# Supplementary material
Source: MDPI journal article supplement (https://www.mdpi.com/2218-0532/90/3/46)
Supplement: s1 [file s1]

**Synthesis and evaluation of (1,4-disubstituted)-1,2,3-triazoles as estrogen receptor beta agonists**

Edward A. Wetzel, Grace C. Corriero, Sandra Brown-Ford, Daniel S. Sem, and William A. Donaldson

|                                                                             |       |
|-----------------------------------------------------------------------------|-------|
| Figure S1. ER $\beta$ TR-FRET displacement assay data                       | S2-S4 |
| <sup>1</sup> H NMR spectrum of <b>5</b> (400 MHz, CD <sub>3</sub> OD)       | S5    |
| <sup>1</sup> H NMR spectrum of <b>5</b> (400 MHz, d <sub>6</sub> -acetone)  | S6    |
| <sup>13</sup> C NMR spectrum of <b>5</b> (100 MHz, d <sub>6</sub> -acetone) | S7    |
| <sup>1</sup> H NMR spectrum of <b>6</b> (400 MHz, CD <sub>3</sub> OD)       | S8    |
| <sup>13</sup> C NMR spectrum of <b>6</b> (100 MHz, CD <sub>3</sub> OD)      | S9    |
| <sup>1</sup> H NMR spectrum of <b>7</b> (400 MHz, d <sub>6</sub> -acetone)  | S10   |
| <sup>13</sup> C NMR spectrum of <b>7</b> (75 MHz, d <sub>6</sub> -acetone)  | S11   |
| <sup>1</sup> H NMR spectrum of <b>8</b> (400 MHz, d <sub>6</sub> -DMSO)     | S12   |
| <sup>1</sup> H NMR spectrum of <b>8</b> (300 MHz, CD <sub>3</sub> OD)       | S13   |
| <sup>13</sup> C NMR spectrum of <b>8</b> (100 MHz, d <sub>6</sub> -DMSO)    | S14   |
| <sup>1</sup> H NMR spectrum of <b>9</b> (400 MHz, CD <sub>3</sub> OD)       | S15   |
| <sup>13</sup> C NMR spectrum of <b>9</b> (100 MHz, d <sub>6</sub> -acetone) | S16   |
| <sup>1</sup> H NMR spectrum of <b>10</b> (400 MHz, CD <sub>3</sub> OD)      | S17   |
| <sup>13</sup> C NMR spectrum of <b>10</b> (100 MHz, d <sub>6</sub> -DMSO)   | S18   |
| <sup>1</sup> H NMR spectrum of <b>11</b> (400 MHz, CD <sub>3</sub> OD)      | S19   |
| <sup>13</sup> C NMR spectrum of <b>11</b> (100 MHz, CD <sub>3</sub> OD)     | S20   |
| <sup>19</sup> F NMR spectrum of <b>11</b> (376 MHz, CD <sub>3</sub> OD)     | S21   |
| <sup>1</sup> H NMR spectrum of <b>12</b> (400 MHz, CD <sub>3</sub> OD)      | S22   |
| <sup>13</sup> C NMR spectrum of <b>12</b> (100 MHz, CD <sub>3</sub> OD)     | S23   |
| <sup>1</sup> H NMR spectrum of <b>13</b> (300 MHz, CD <sub>3</sub> OD)      | S24   |
| <sup>13</sup> C NMR spectrum of <b>13</b> (75 MHz, CD <sub>3</sub> OD)      | S25   |
| <sup>1</sup> H NMR spectrum of <b>14</b> (400 MHz, CD <sub>3</sub> OD)      | S26   |
| <sup>13</sup> C NMR spectrum of <b>14</b> (100 MHz, CD <sub>3</sub> OD)     | S27   |
| <sup>1</sup> H NMR spectrum of <b>15</b> (400 MHz, CD <sub>3</sub> OD)      | S28   |
| <sup>13</sup> C NMR spectrum of <b>15</b> (75 MHz, CD <sub>3</sub> OD)      | S29   |
| <sup>1</sup> H NMR spectrum of <b>16</b> (400 MHz, CD <sub>3</sub> OD)      | S30   |
| <sup>13</sup> C NMR spectrum of <b>16</b> (100 MHz, CD <sub>3</sub> OD)     | S31   |
| <sup>19</sup> F NMR spectrum of <b>16</b> (376 MHz, CD <sub>3</sub> OD)     | S32   |
| <sup>1</sup> H NMR spectrum of <b>17</b> (400 MHz, CD <sub>3</sub> OD)      | S33   |
| <sup>13</sup> C NMR spectrum of <b>17</b> (100 MHz, CD <sub>3</sub> OD)     | S34   |
| <sup>1</sup> H NMR spectrum of <b>18</b> (300 MHz, CD <sub>3</sub> OD)      | S35   |
| <sup>13</sup> C NMR spectrum of <b>18</b> (75 MHz, CD <sub>3</sub> OD)      | S36   |
| <sup>1</sup> H NMR spectrum of <b>19</b> (300 MHz, CD <sub>3</sub> OD)      | S37   |
| <sup>13</sup> C NMR spectrum of <b>19</b> (75 MHz, CD <sub>3</sub> OD)      | S38   |
| <sup>1</sup> H NMR spectrum of <b>20</b> (300 MHz, CD <sub>3</sub> OD)      | S39   |
| <sup>13</sup> C NMR spectrum of <b>20</b> (75 MHz, CD <sub>3</sub> OD)      | S40   |
| <sup>1</sup> H NMR spectrum of <b>21</b> (400 MHz, CD <sub>3</sub> OD)      | S41   |
| <sup>13</sup> C NMR spectrum of <b>21</b> (100 MHz, CD <sub>3</sub> OD)     | S42   |

**Figure S1.** ER $\beta$  TR-FRET displacement assay data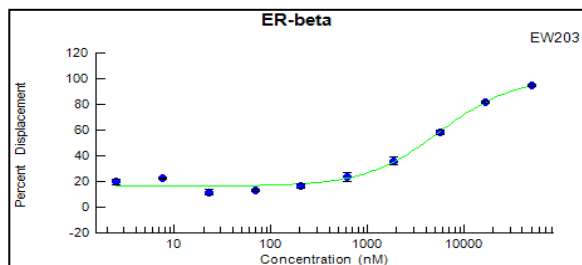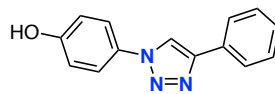**5**  $EC_{50} = 5.53 \mu M$ 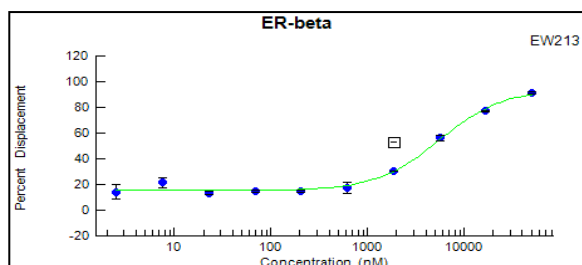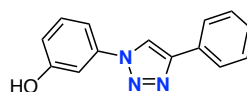**6**  $EC_{50} = 5.51 \mu M$ 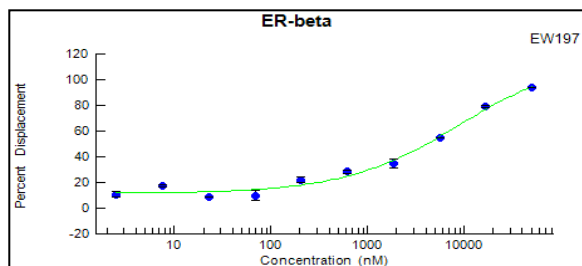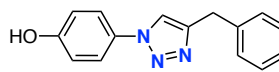**7**  $EC_{50} = 9.04 \mu M$ 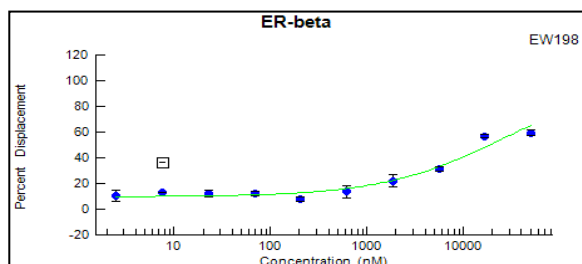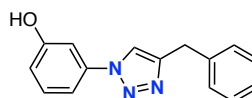**8**  $EC_{50} = 25.8 \mu M$ 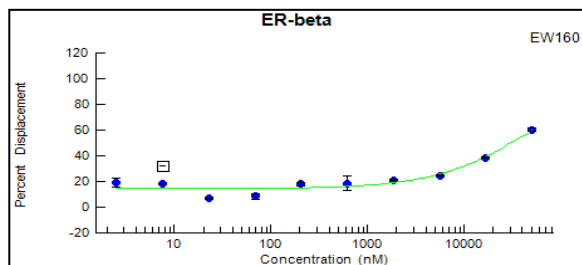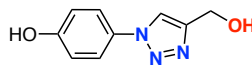**9**  $EC_{50} = 44.6 \mu M$

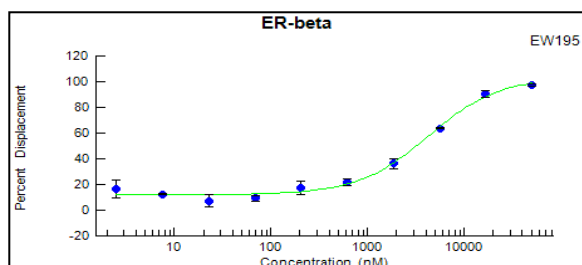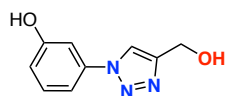

**10**  $EC_{50} = 4.28 \mu M$

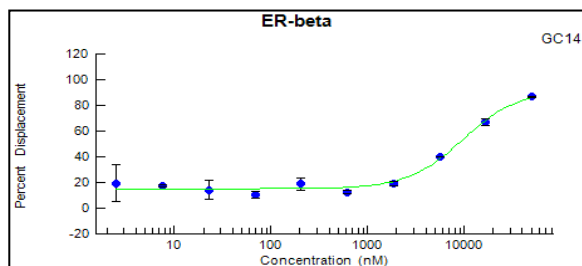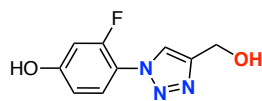

**11**  $EC_{50} = 9.69 \mu M$

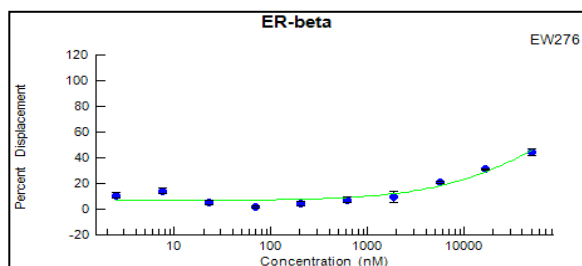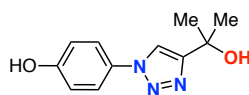

**12**  $EC_{50} = >50 \mu M$

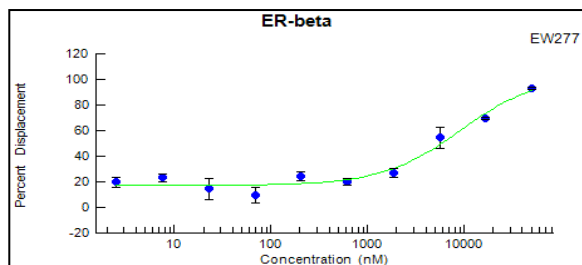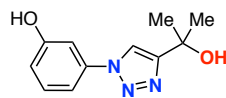

**13**  $EC_{50} = 9.15 \mu M$

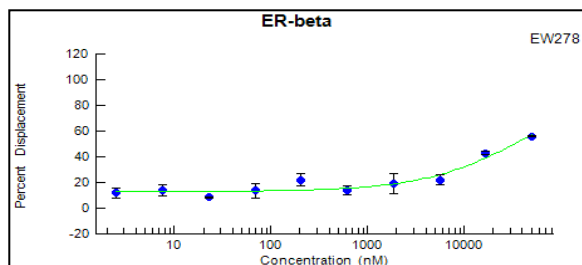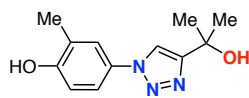

**14**  $EC_{50} = 48.1 \mu M$

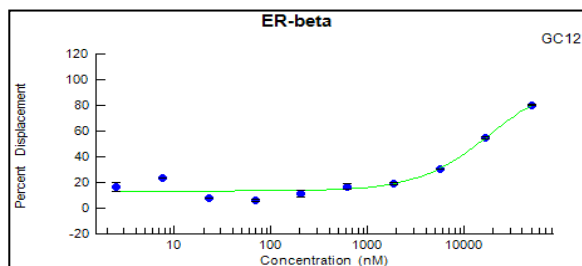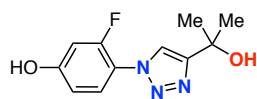

**16**  $EC_{50} = 18.2 \mu M$

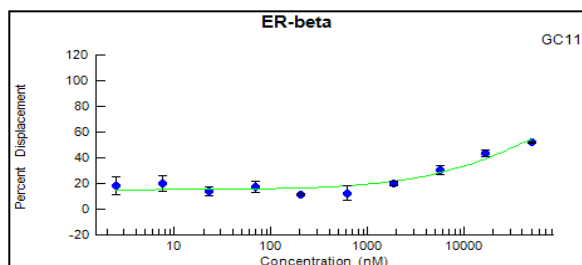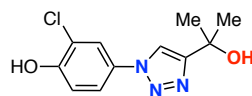

**17**  $EC_{50} = >50 \mu M$

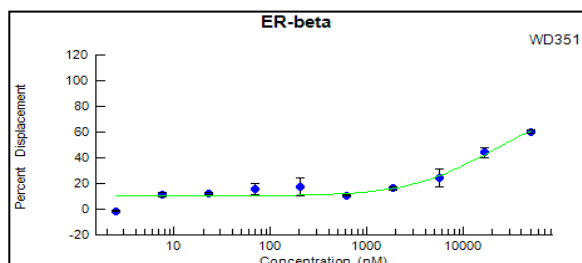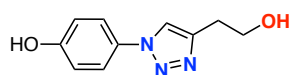

**18**  $EC_{50} = 18.2 \mu M$

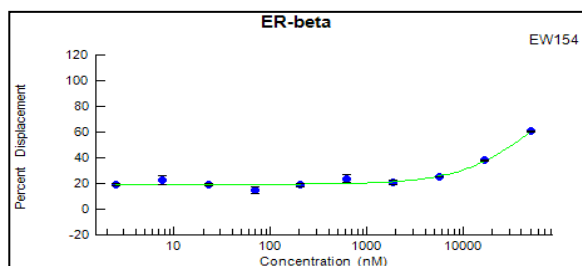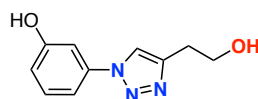

**19**  $EC_{50} = >50 \mu M$

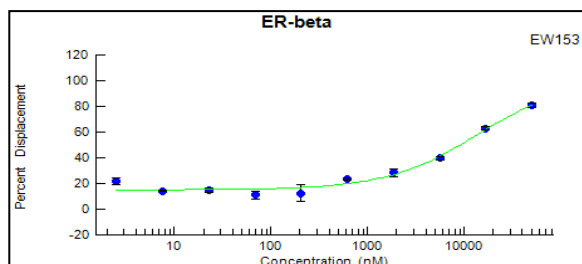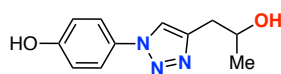

**(±)-20**  $EC_{50} = 13.6 \mu M$

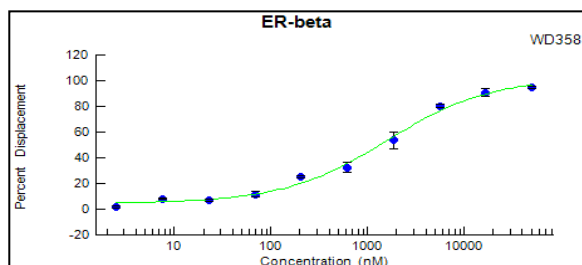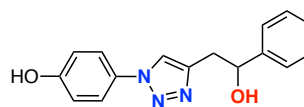

**(±)-21**  $EC_{50} = 1.59 \mu M$

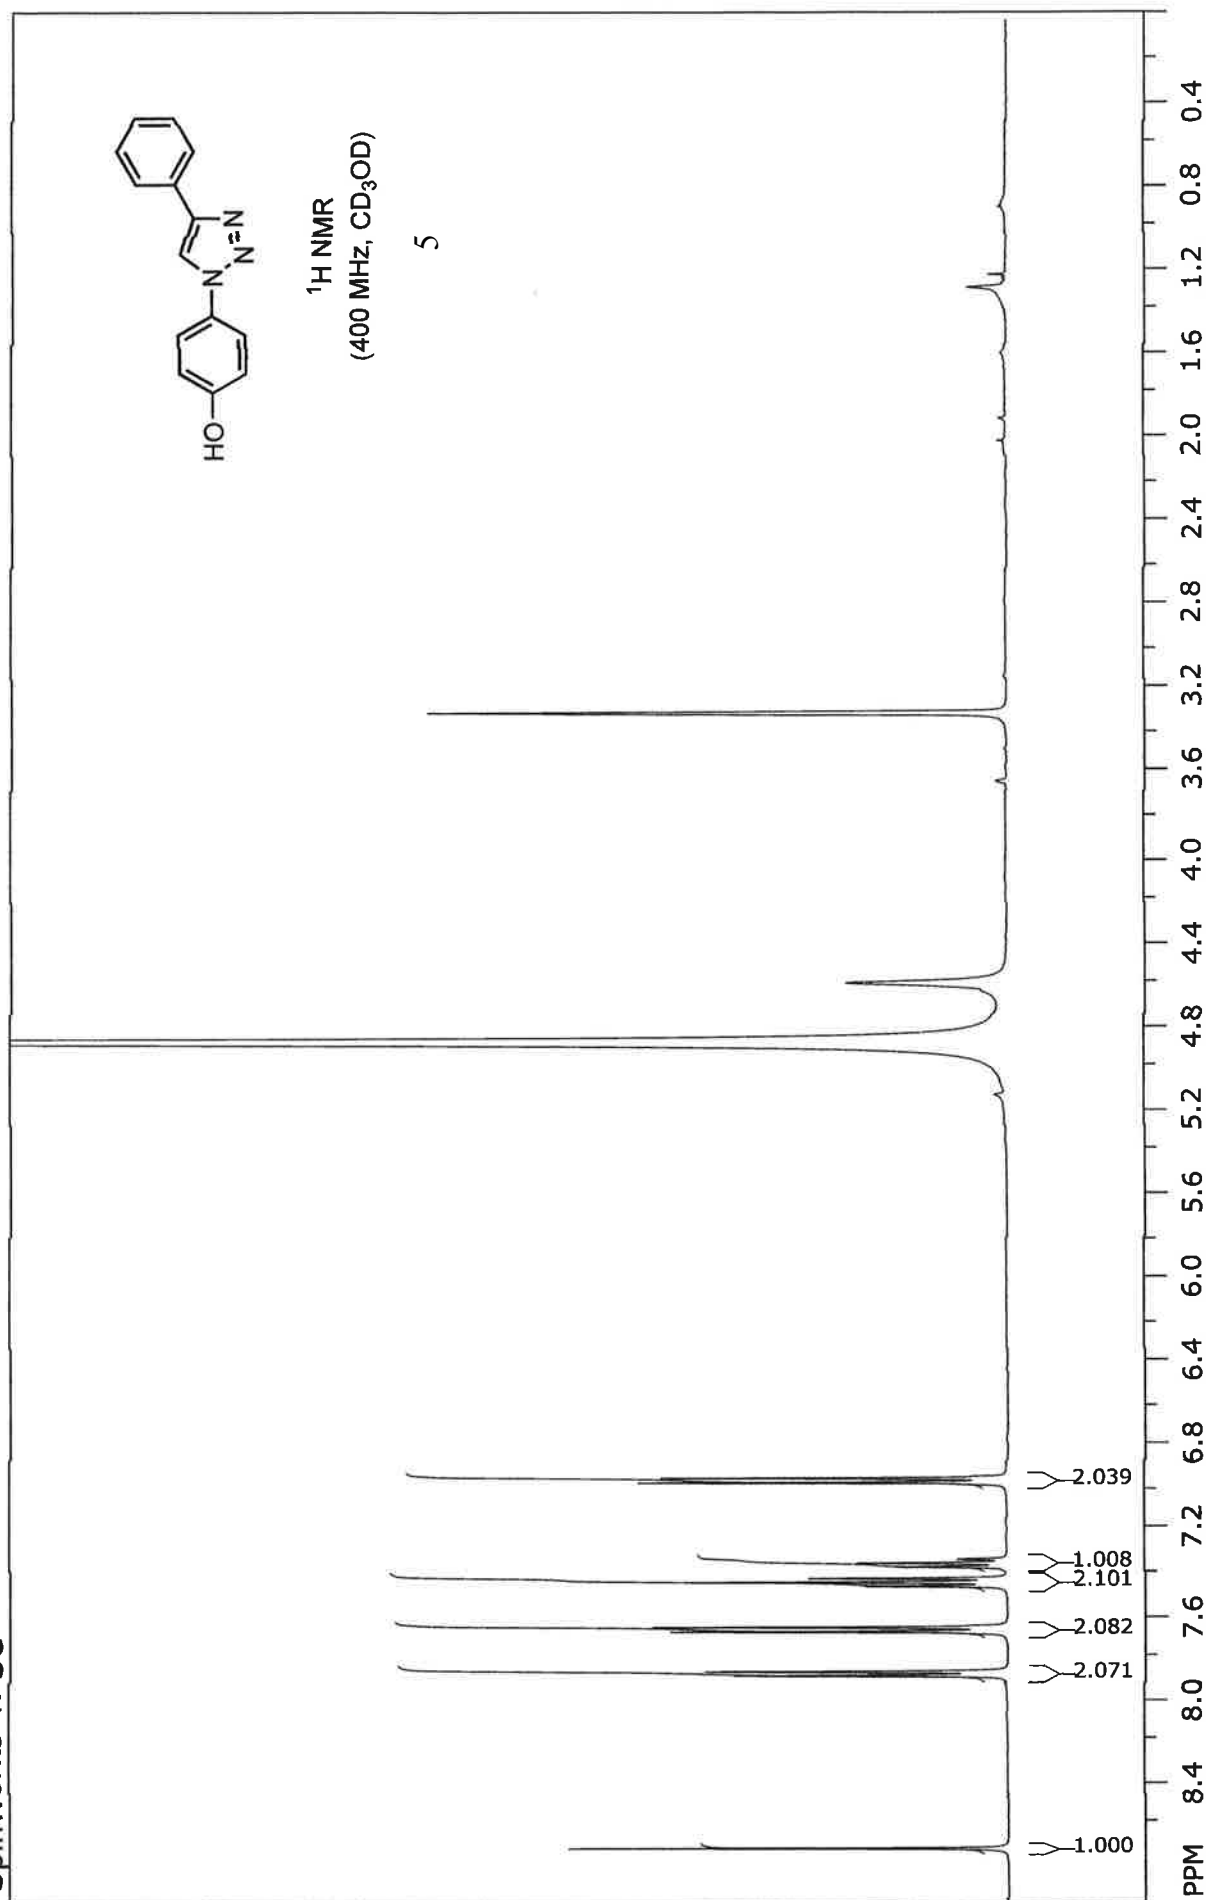

file: ...\\Desktop\\EAW-203-H-MeOH-d4.fid\\fid block# 1 expt: "s2pul"  
transmitter freq.: 399.731815 MHz  
time domain size: 32768 points  
width: 6410.26 Hz = 16.0364 ppm = 0.195626 Hz/pt  
number of scans: 8

freq. of 0 ppm: 399.729414 MHz  
processed size: 32768 complex points  
LB: 0.500 GF: 0.0000  
Hz/cm: 143.875 ppm/cm: 0.35993

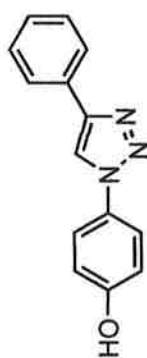

<sup>1</sup>H NMR  
(400 MHz, d<sub>6</sub>-acetone)

5

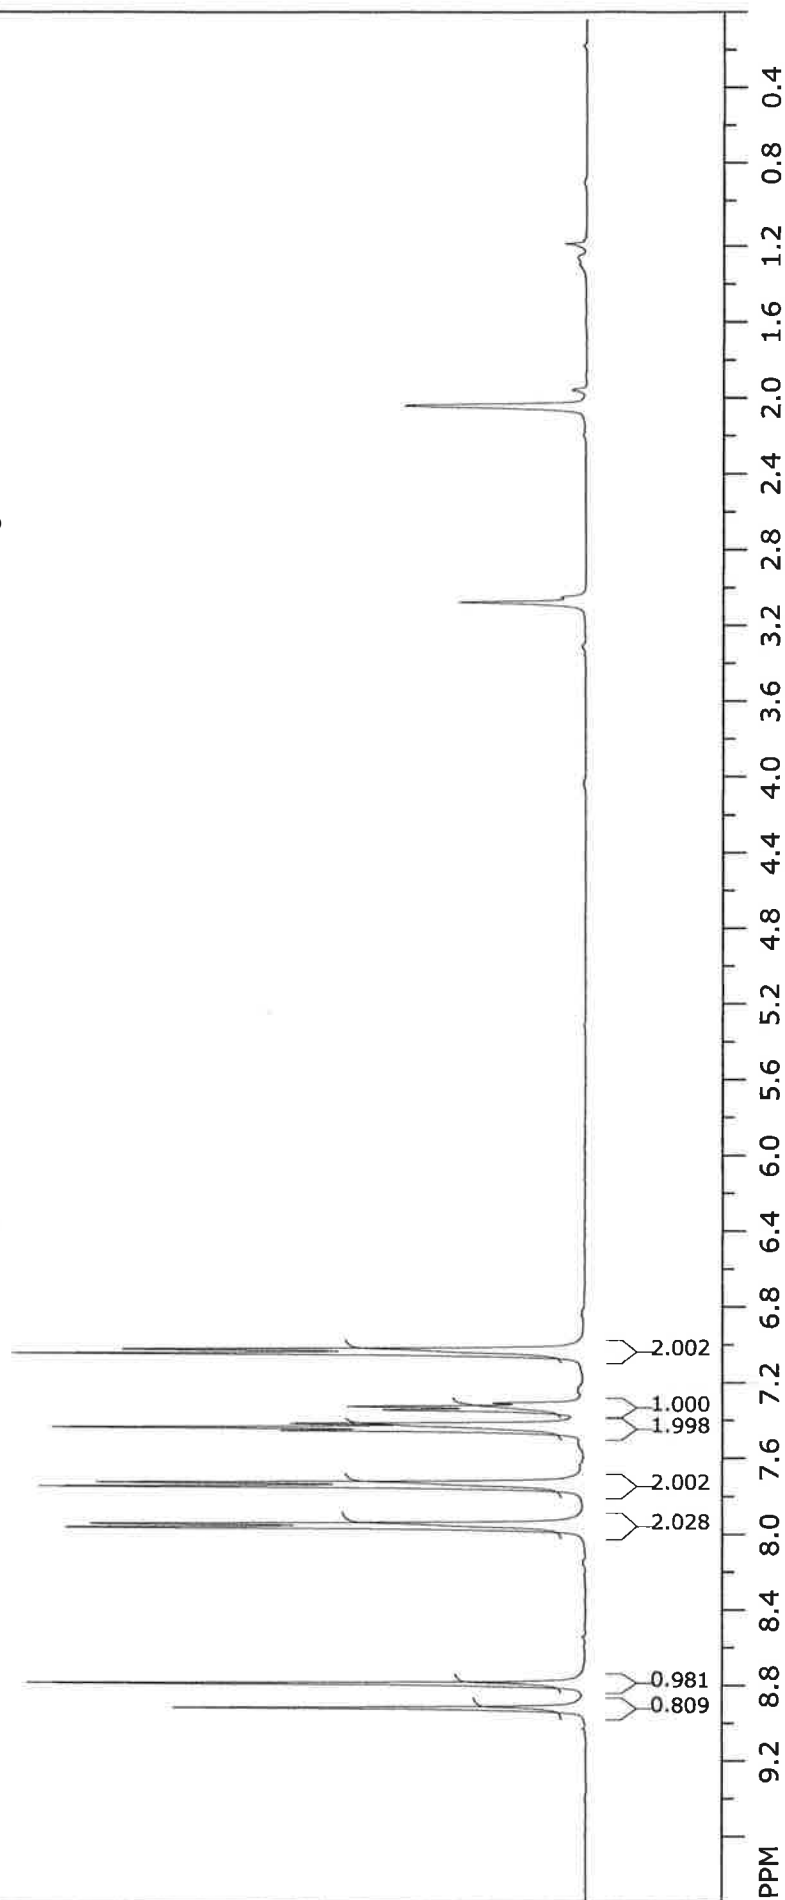

file: ...Compounds\1\_14\_18\_FirstNMR.fid\fid block# 1 expt: "s2pul"

transmitter freq.: 399.736224 MHz

time domain size: 32768 points

width: 6410.26 Hz = 16.0362 ppm = 0.195626 Hz/pt

number of scans: 8

freq. of 0 ppm: 399.733820 MHz

processed size: 32768 complex points

LB: 1.500 GF: 0.0000

Hz/cm: 159.829 ppm/cm: 0.39984

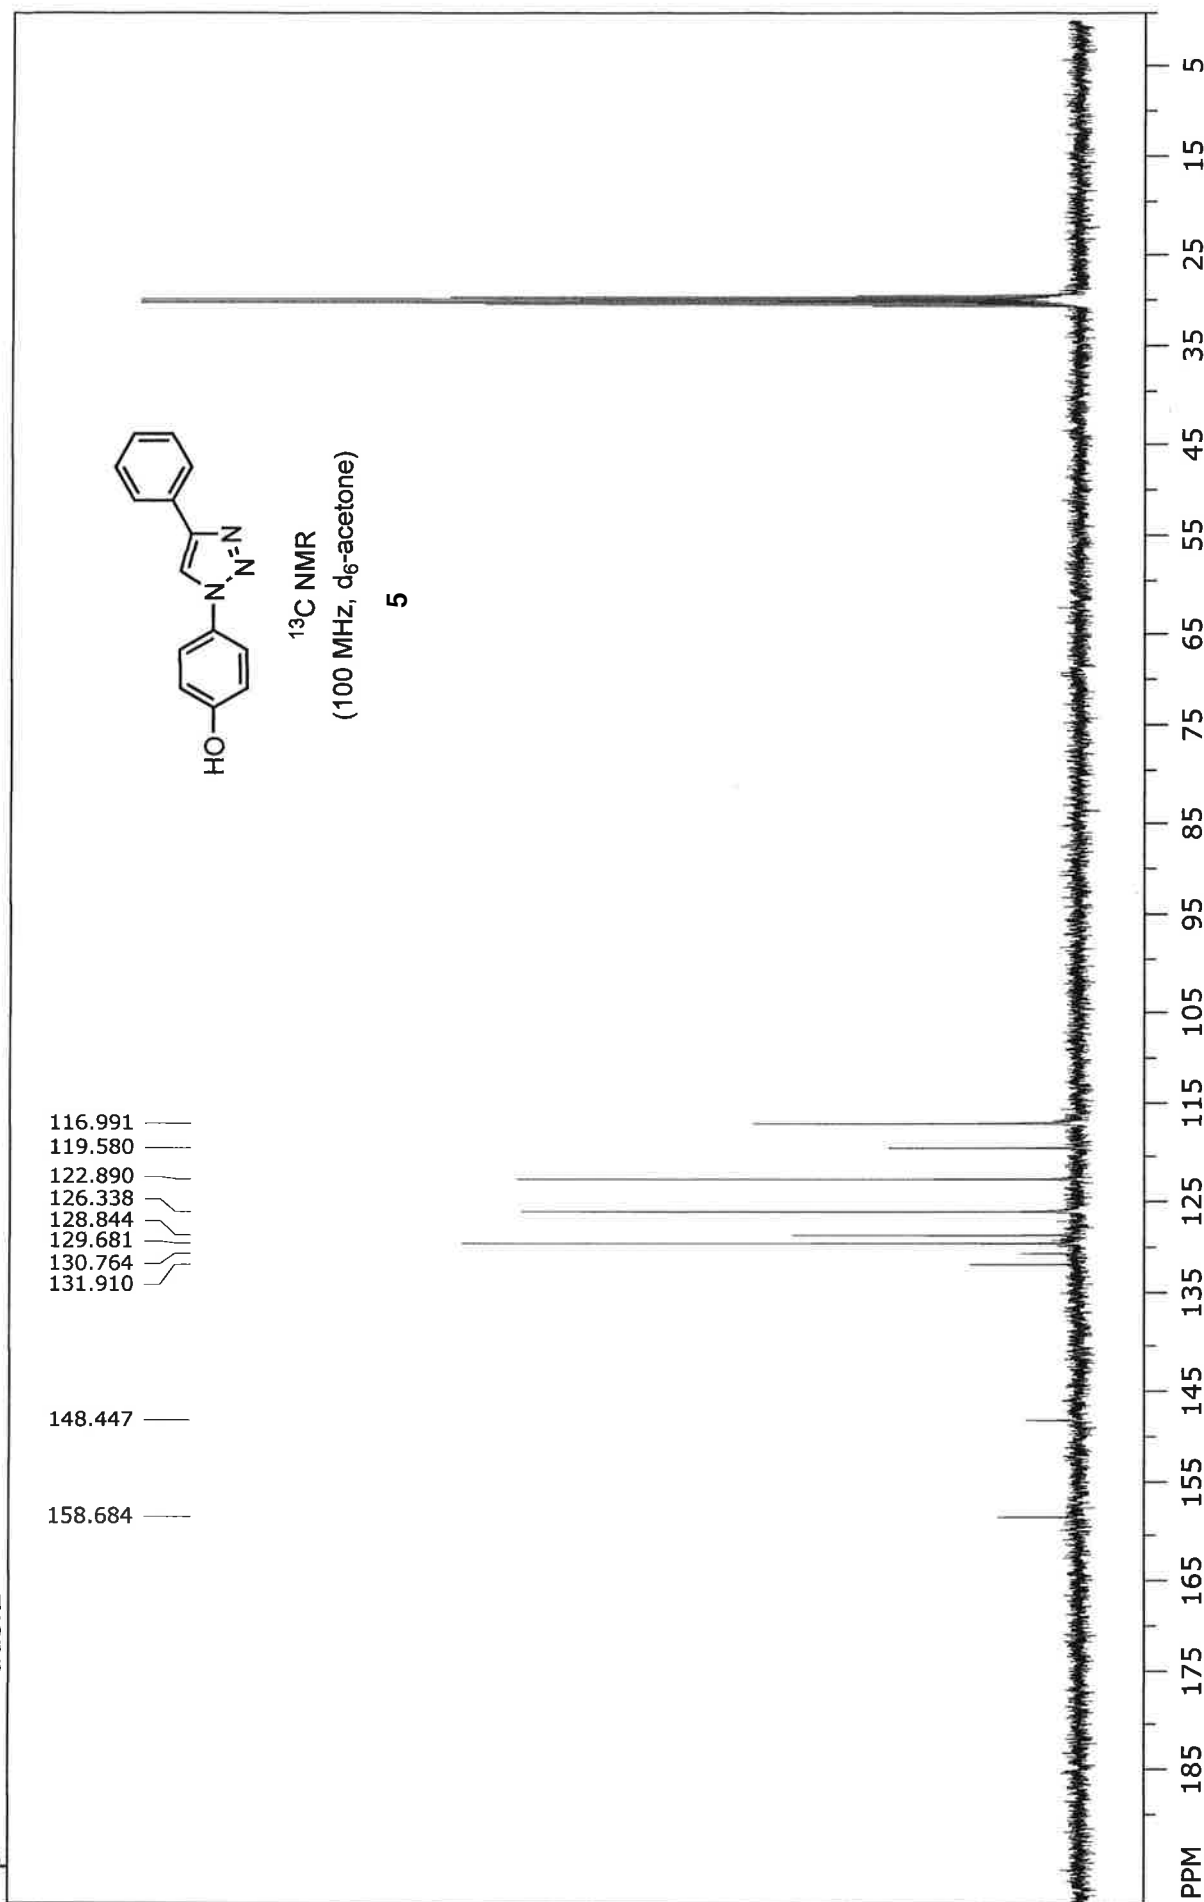

file: ...nds\1\_14\_18\_FirstNMRCARBON.fid\fid block# 1 expt: "s2pul"  
transmitter freq.: 100.524207 MHz  
time domain size: 65536 points  
width: 25000.00 Hz = 248.6963 ppm = 0.381470 Hz/pt  
number of scans: 256

freq. of 0 ppm: 100.513061 MHz  
processed size: 65536 complex points  
LB: 1.500 GF: 0.0000  
Hz/cm: 803.371 ppm/cm: 7.99181

# SpinWorks 4: STANDARD 1H OBSERVE - profile

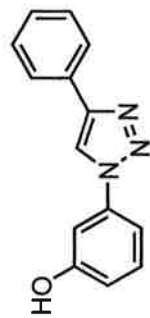

<sup>1</sup>H NMR  
(400 MHz, CD<sub>3</sub>OD)

6

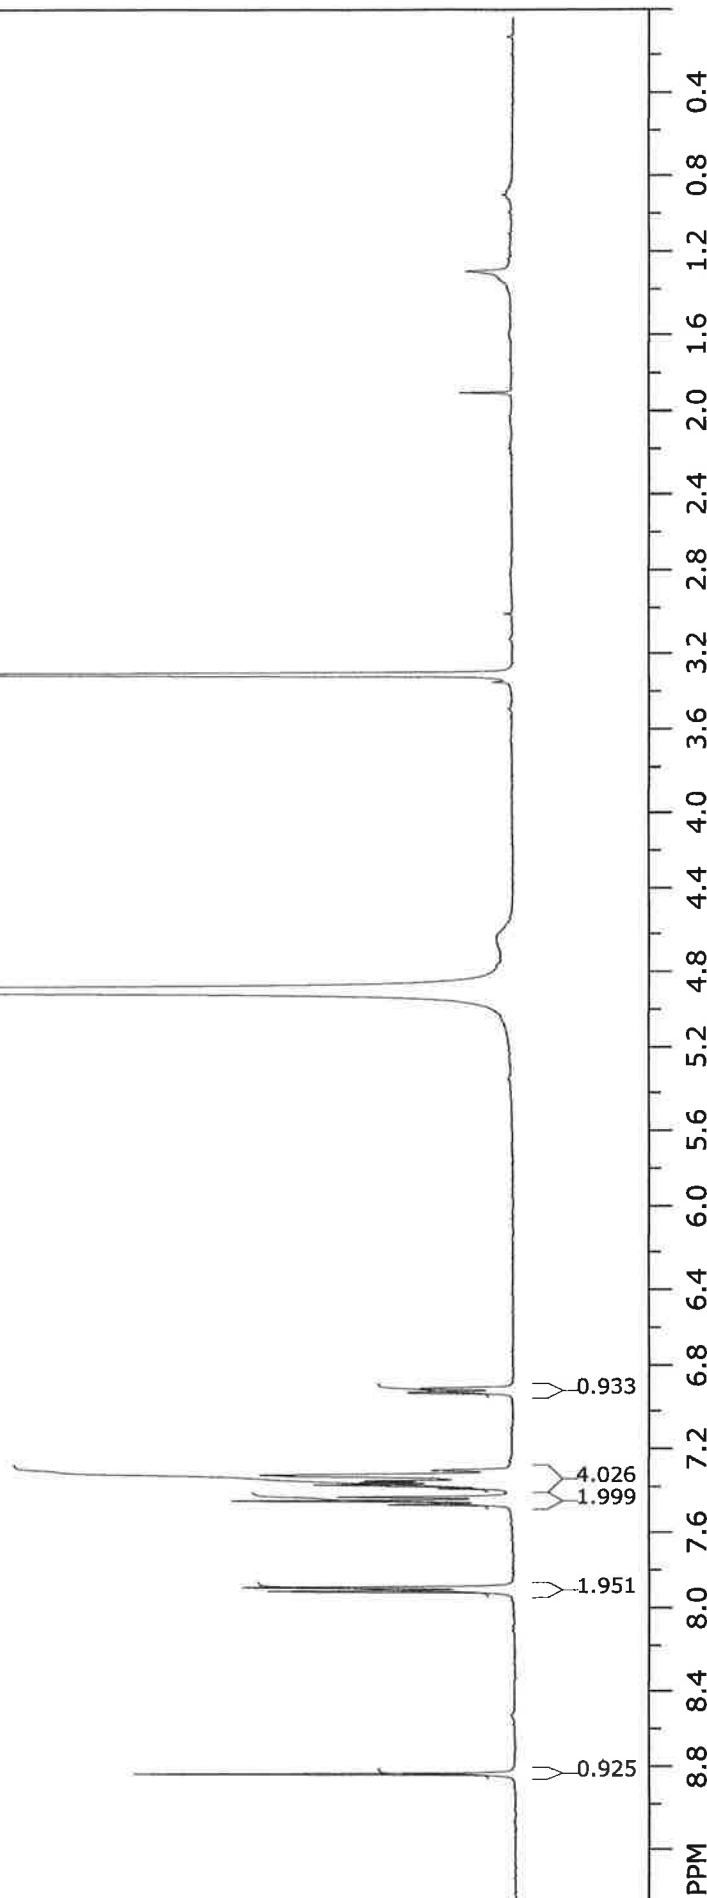

file: ...riazole Compounds\EAOW204-H.fid\fid block# 1 expt: "s2pul"

transmitter freq.: 399.731815 MHz

time domain size: 32768 points

width: 6410.26 Hz = 16.0364 ppm = 0.195626 Hz/pt

number of scans: 8

freq. of 0 ppm: 399.729414 MHz

processed size: 32768 complex points

LB: 0.561 GF: 0.0000

Hz/cm: 151.852 ppm/cm: 0.37988



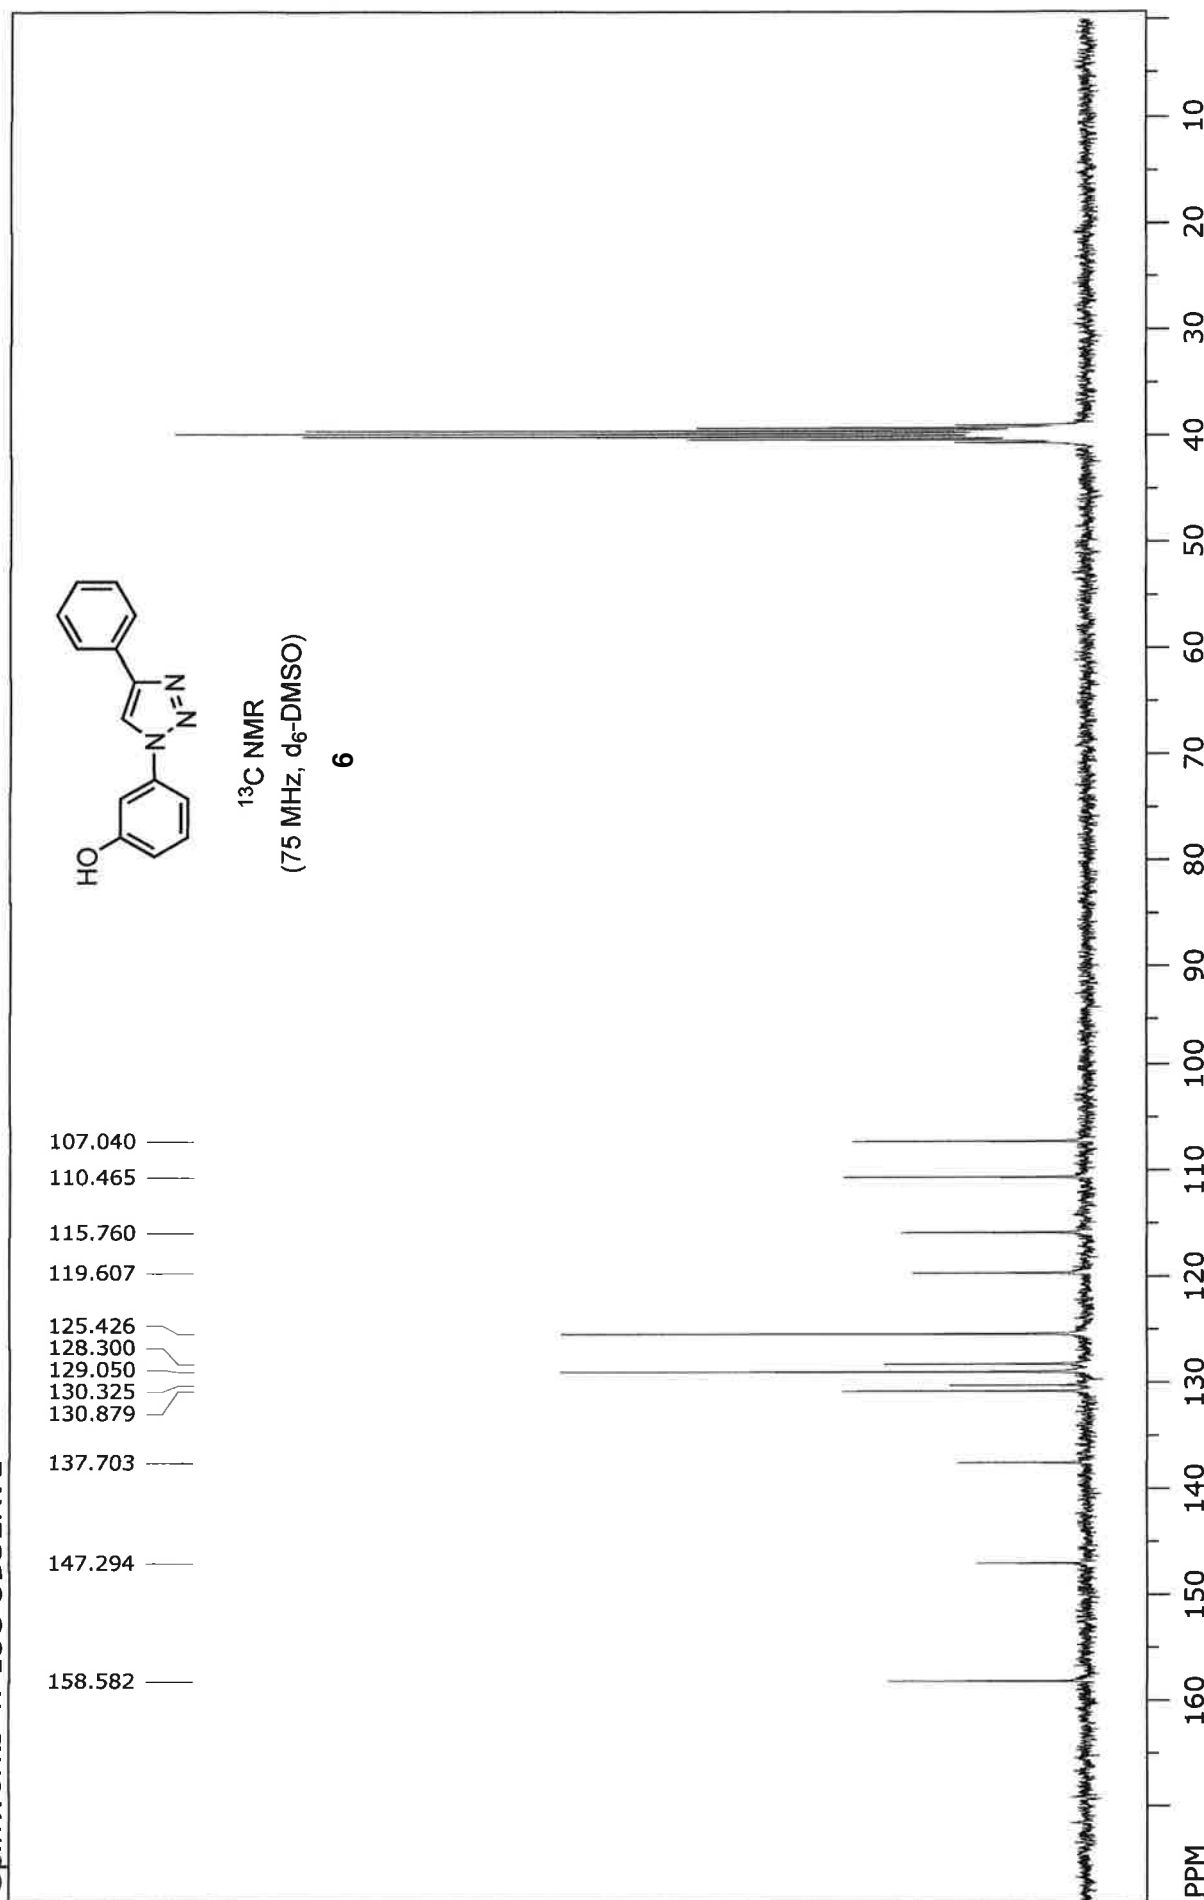

file: ...unds\12\_7\_18\_EAW418\_Carbon.fid\fid block# 1 expt: "s2pul"  
transmitter freq.: 75.476694 MHz  
time domain size: 68492 points  
width: 18867.92 Hz = 249.9835 ppm = 0.275476 Hz/pt  
number of scans: 256

freq. of 0 ppm: 75.468438 MHz  
processed size: 131072 complex points  
LB: 1.500 GF: 0.0000  
Hz/cm: 543.396 ppm/cm: 7.19952

SpinWorks 4: ghkj1111

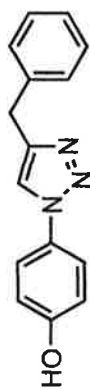

<sup>1</sup>H NMR  
(400 MHz, d<sub>6</sub>-acetone)

7

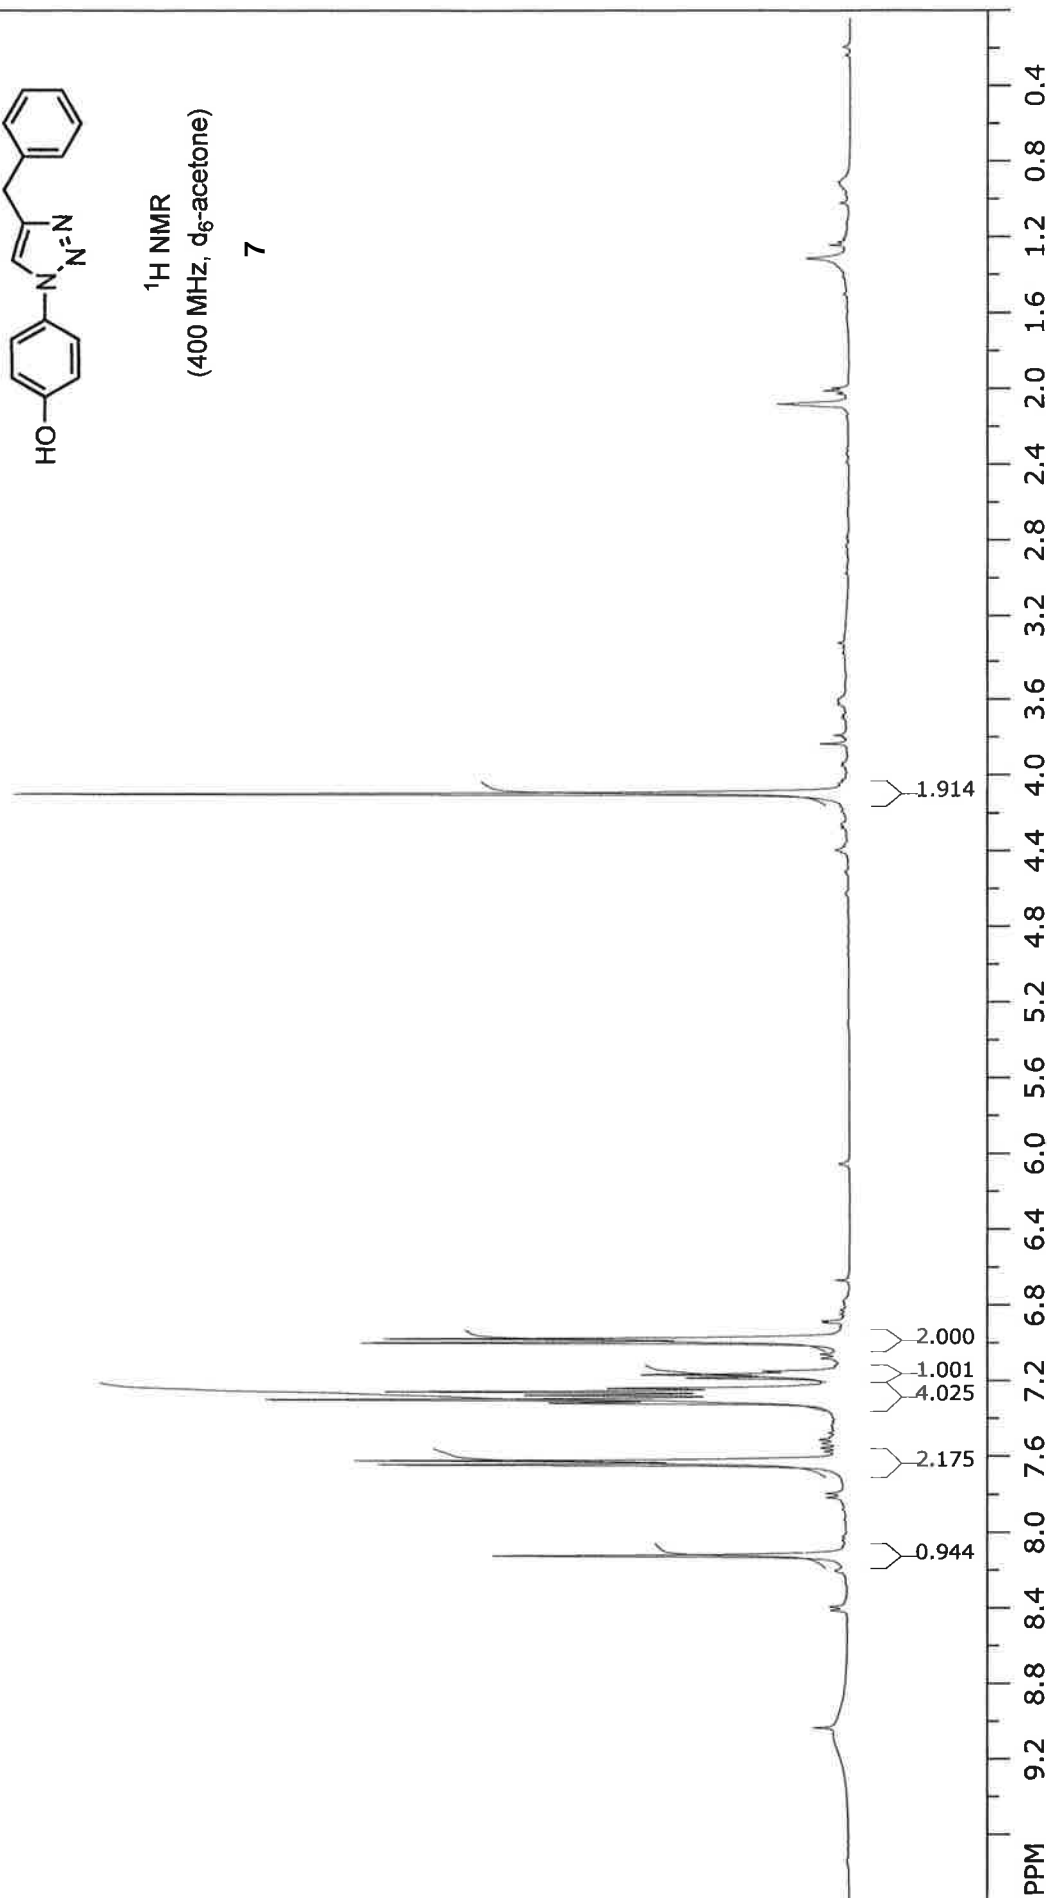

file: ...15\_18\_Naphthalenecompound.fid\fid block# 1 expt: "s2pul"  
 transmitter freq.: 399.736224 MHz  
 time domain size: 32768 points  
 width: 6410.26 Hz = 16.0362 ppm = 0.195626 Hz/pt  
 number of scans: 8  
 freq. of 0 ppm: 399.733819 MHz  
 processed size: 32768 complex points  
 LB: 1.500 GF: 0.0000  
 Hz/cm: 159.829 ppm/cm: 0.39984

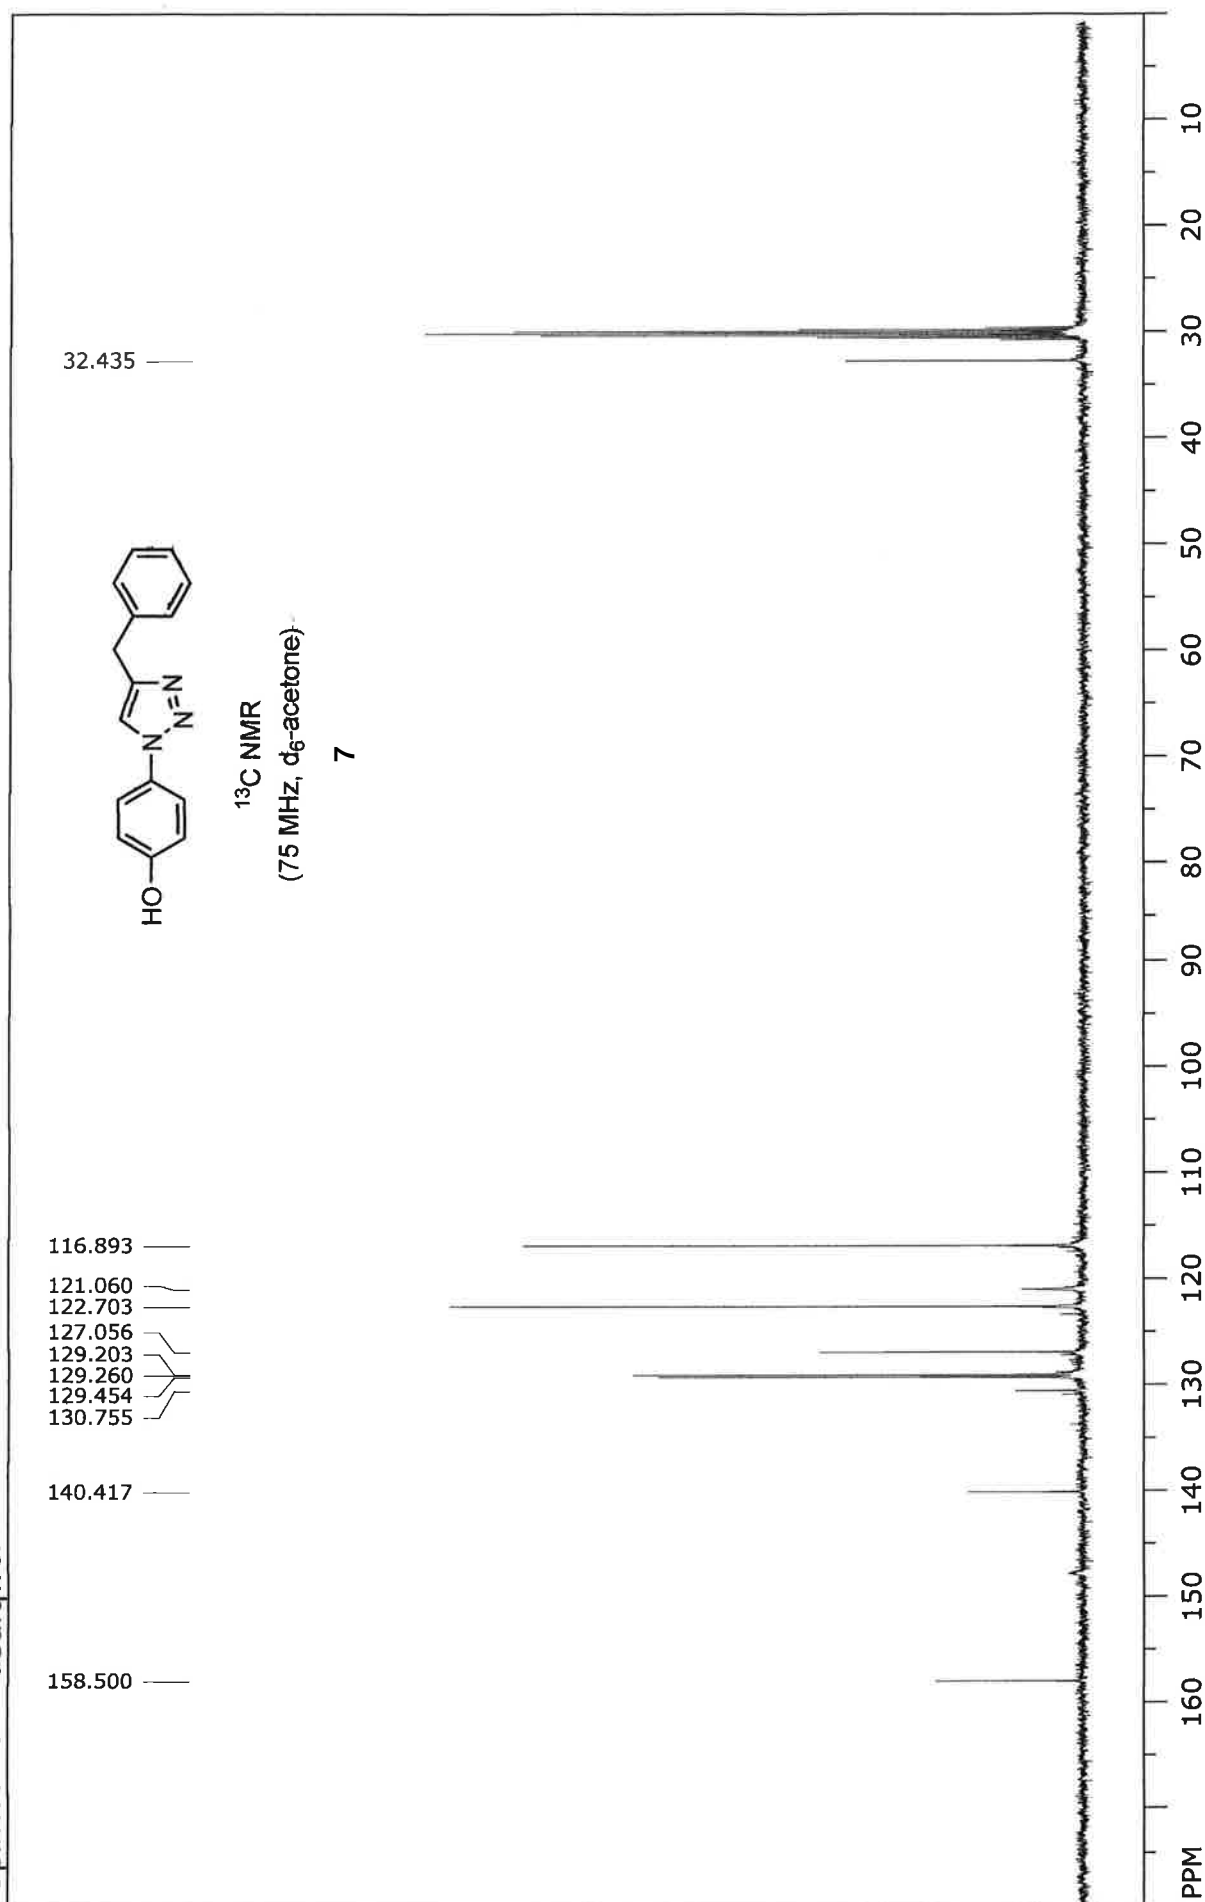

file: ...\_NaphthalenecompoundCARBON.fid\fid block# 1 expt: "s2pul"  
transmitter freq.: 100.524207 MHz  
time domain size: 65536 points  
width: 25000.00 Hz = 248.6963 ppm = 0.381470 Hz/pt  
number of scans: 256

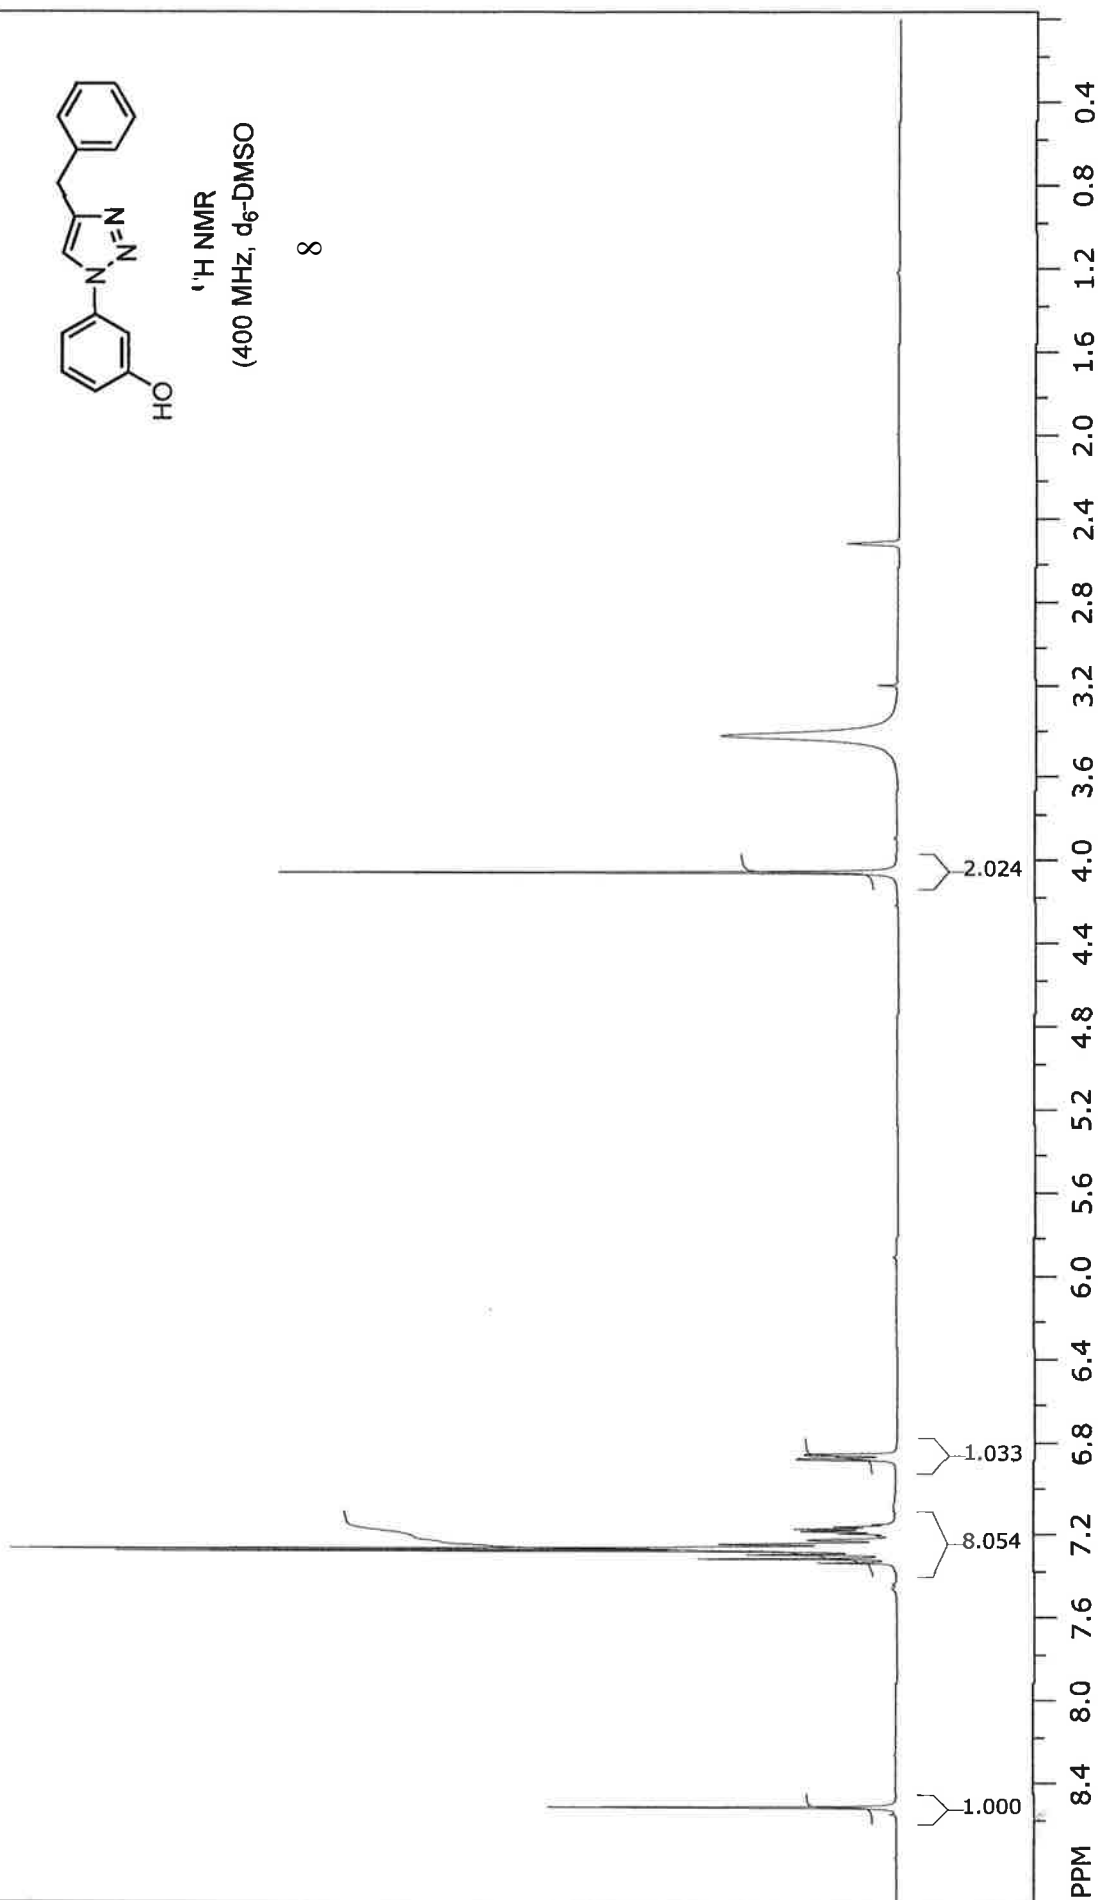

file: ...naldsonw\Desktop\EAW-198-H.fid\fid block# 1 expt: "s2pul"

transmitter freq.: 399.732139 MHz

time domain size: 32768 points

width: 6410.26 Hz = 16.0364 ppm = 0.195626 Hz/pt

number of scans: 8

freq. of 0 ppm: 399.729735 MHz  
processed size: 32768 complex points  
LB: 0.500 GF: 0.0000  
Hz/cm: 143.875 ppm/cm: 0.35993

# SpinWorks 4: STANDARD 1H OBSERVE

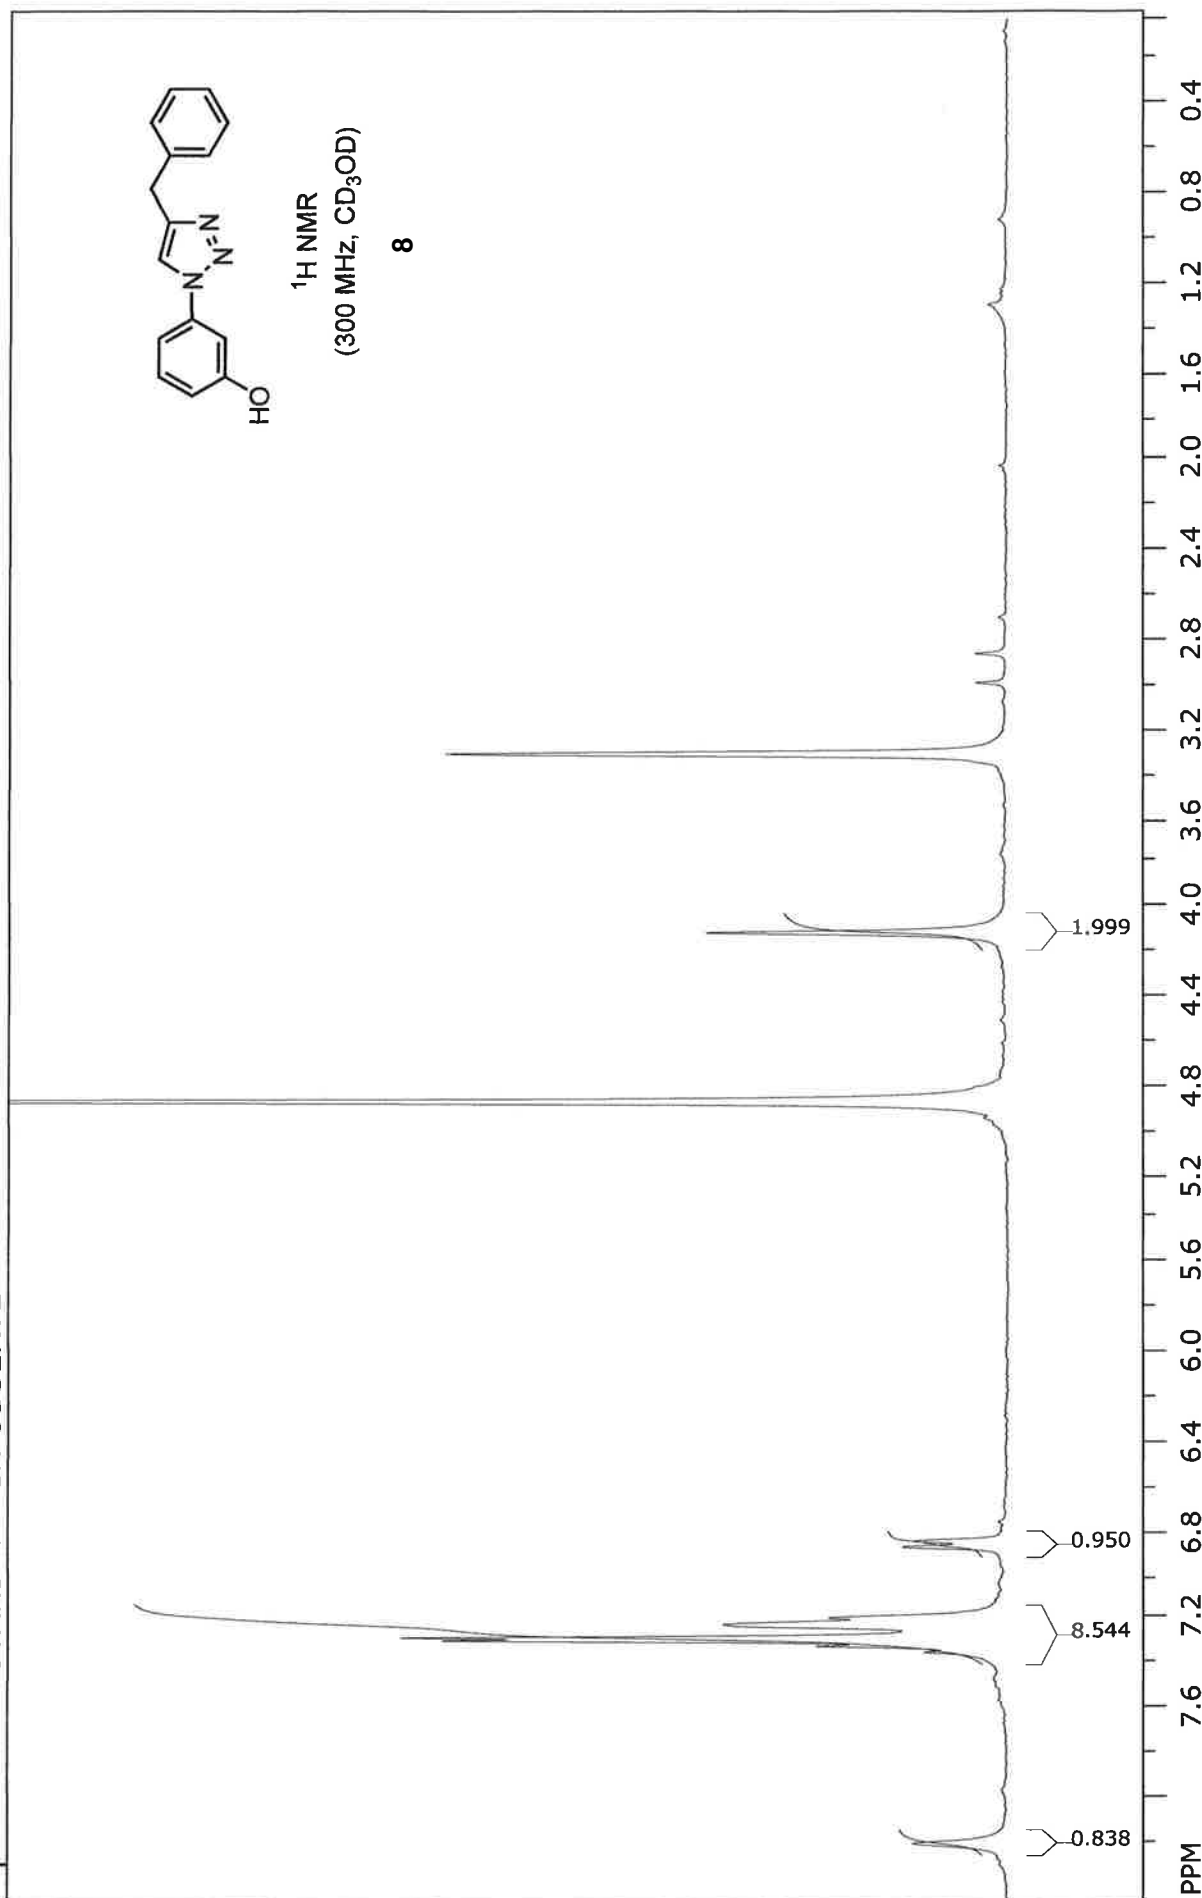

file: ...azole Compounds\1\_18\_18\_2W.fid block# 1 expt: "s2pul"  
 transmitter freq.: 300.134191 MHz  
 time domain size: 19192 points  
 width: 4803.07 Hz = 16.0031 ppm = 0.250264 Hz/pt  
 number of scans: 8

freq. of 0 ppm: 300.132388 MHz  
 processed size: 32768 complex points  
 LB: 1.500 GF: 0.0000  
 Hz/cm: 102.039 ppm/cm: 0.33998

## SpinWorks 4: SC

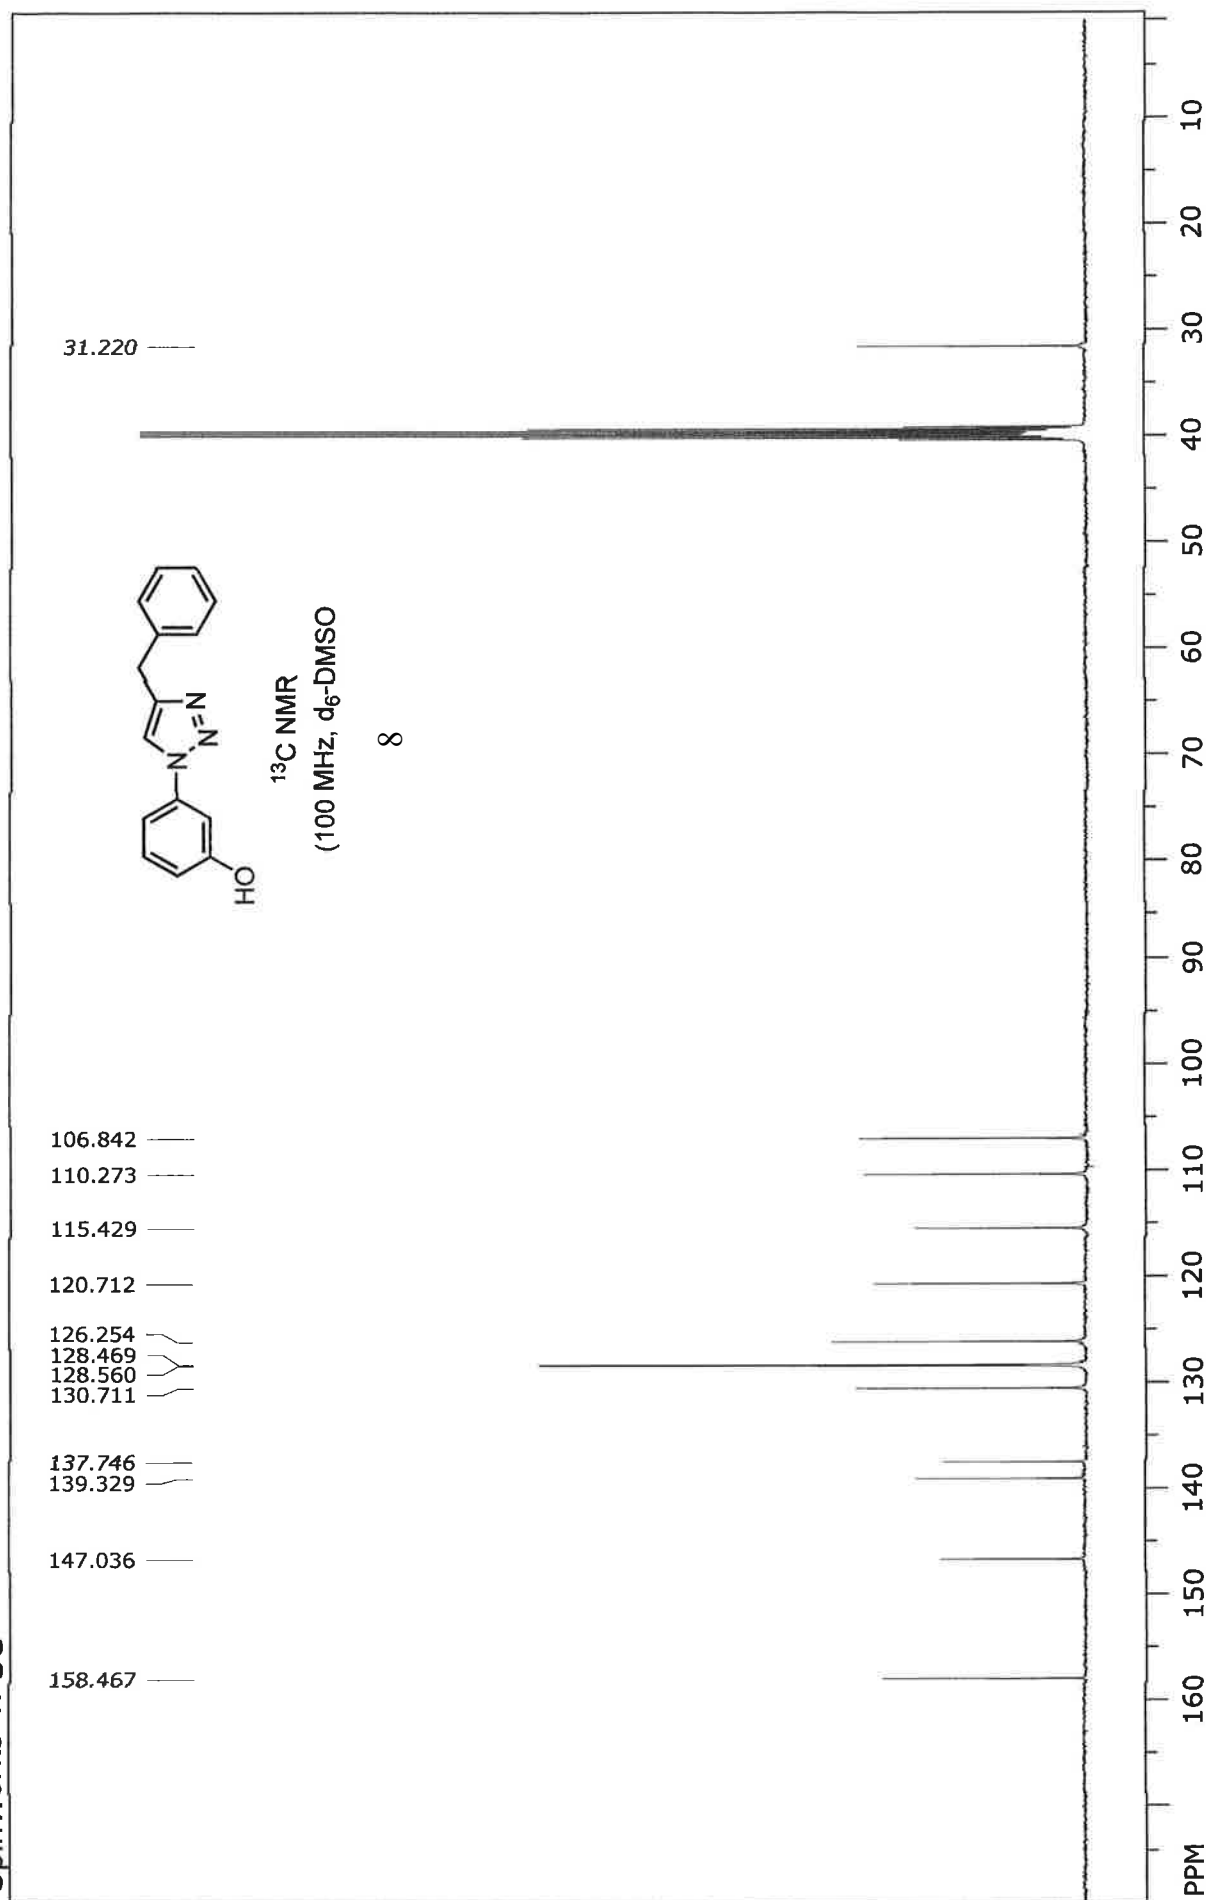

file: ...dsonw\Desktop\EAW-198-C-II.fid\fid block# 1 expt: "s2pul"  
transmitter freq.: 100.523180 MHz  
time domain size: 65536 points  
width: 25000.00 Hz = 248.6989 ppm = 0.381470 Hz/pt  
number of scans: 10000

freq. of 0 ppm: 100.512165 MHz  
processed size: 65536 complex points  
LB: 1.500 GF: 0.0000  
Hz/cm: 723.889 ppm/cm: 7.20121

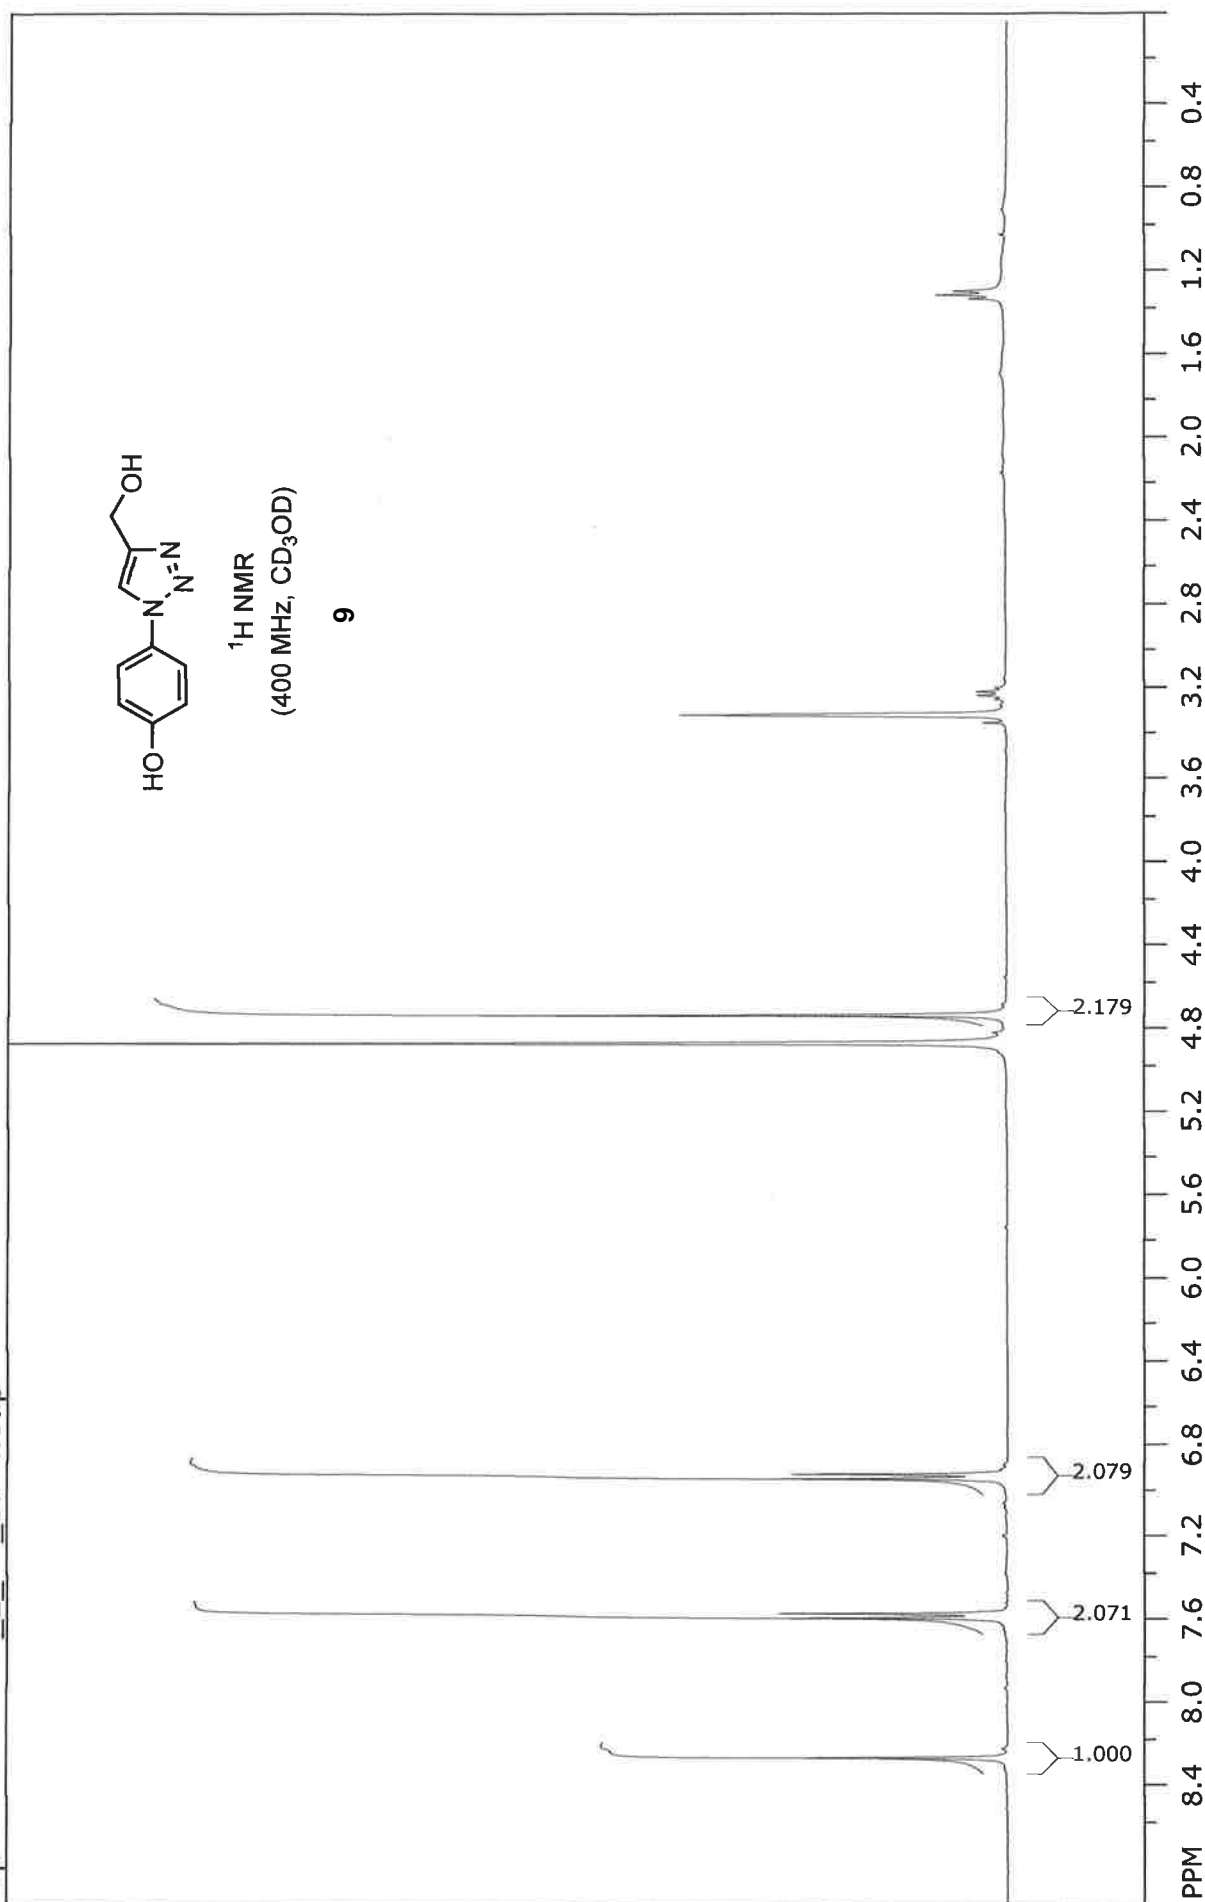

file: ...Compounds\11\_2\_18\_blackCap.fid block# 1 expt: "s2pul"  
transmitter freq.: 399.735724 MHz  
time domain size: 32768 points  
width: 6410.26 Hz = 16.0362 ppm = 0.195626 Hz/pt  
number of scans: 8  
freq. of 0 ppm: 399.733317 MHz  
processed size: 32768 complex points  
LB: 1.500 GF: 0.0000  
Hz/cm: 143.875 ppm/cm: 0.35992

## SpinWorks 4: 12\_18\_17\_4-azidophenol\_propargylalcoholCARBON

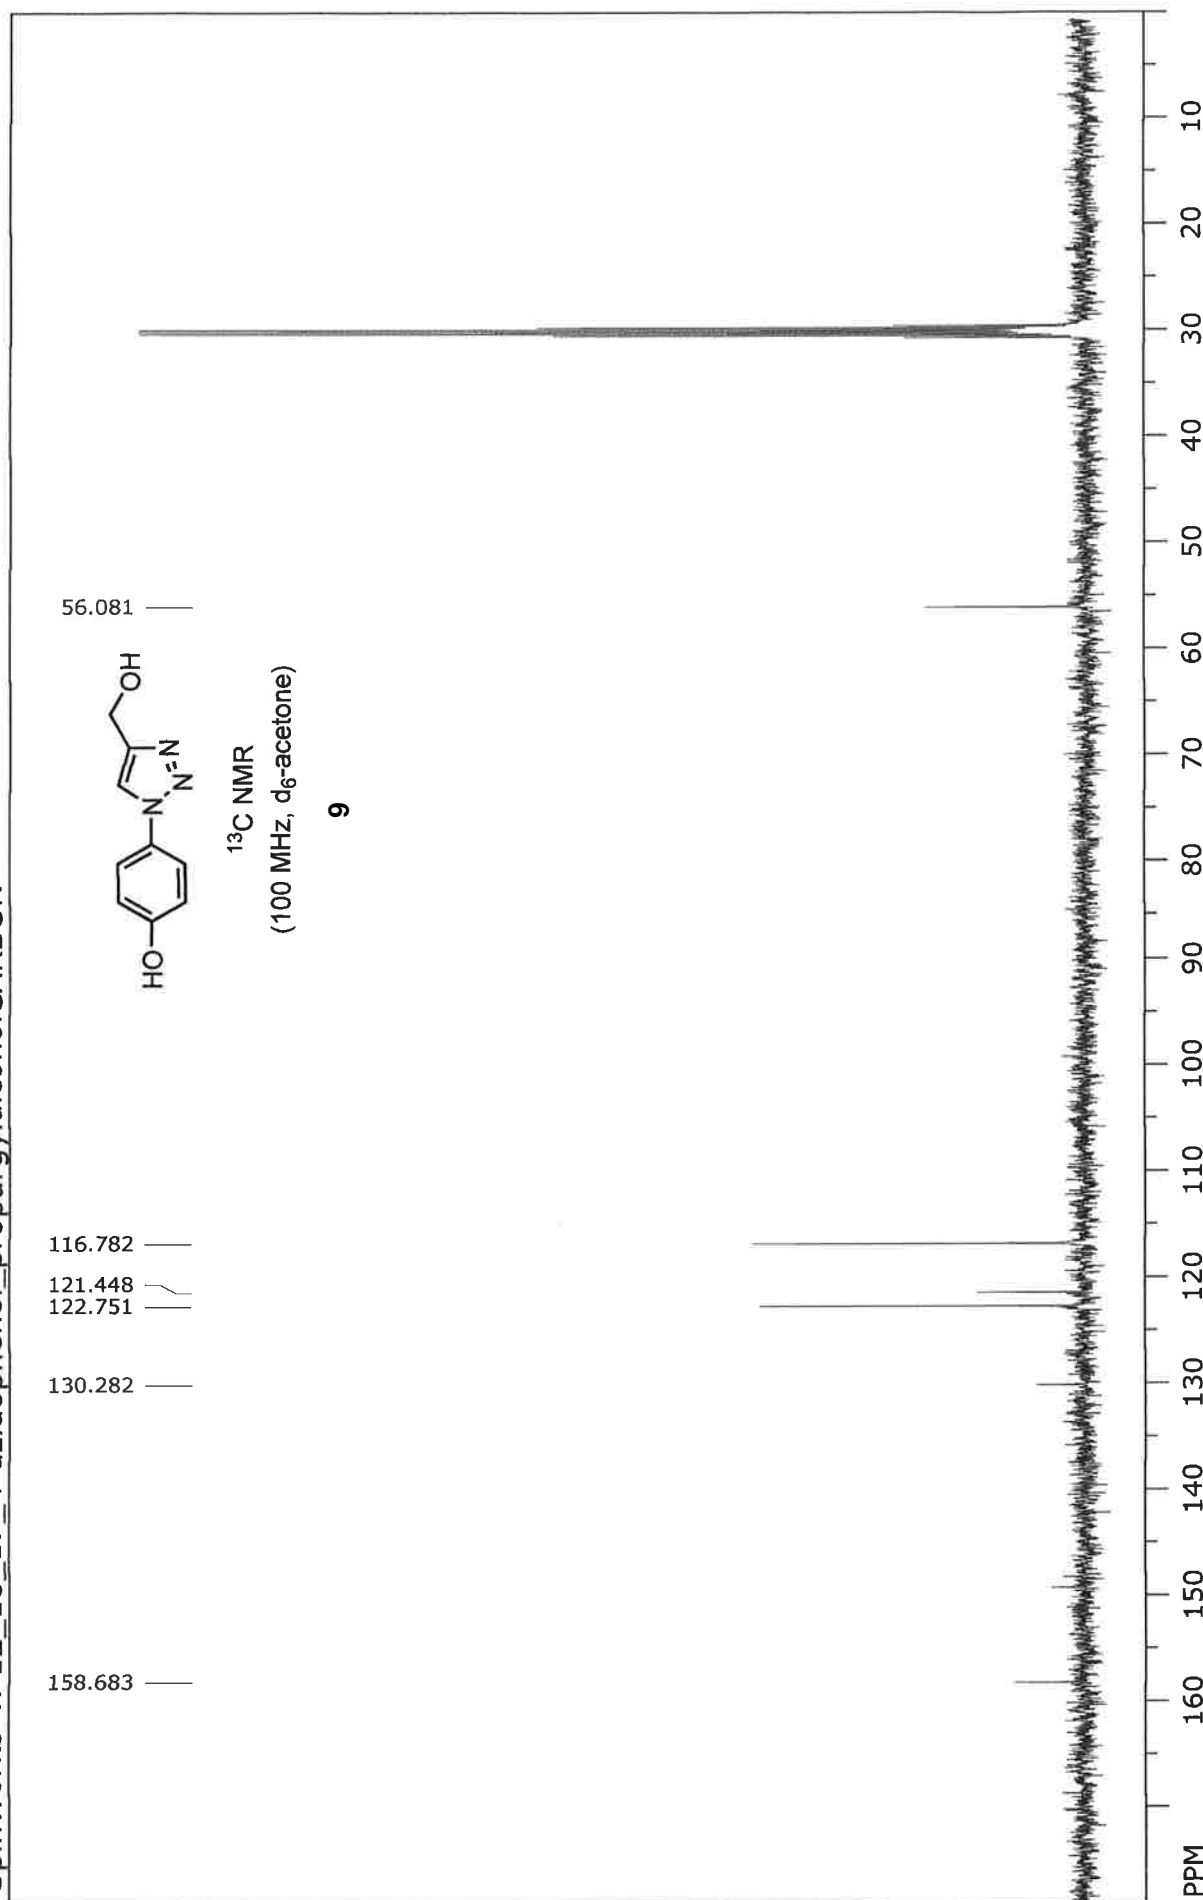

file: ...nol\_propargylalcoholCARBON.fid block# 1 expt: "s2pul"  
transmitter freq.: 100.524163 MHz  
time domain size: 65536 points  
width: 25000.00 Hz = 248.6964 ppm = 0.381470 Hz/pt  
number of scans: 256

freq. of 0 ppm: 100.513072 MHz  
processed size: 65536 complex points  
LB: 2.500 GF: 0.0000  
Hz/cm: 723.333 ppm/cm: 7.19562



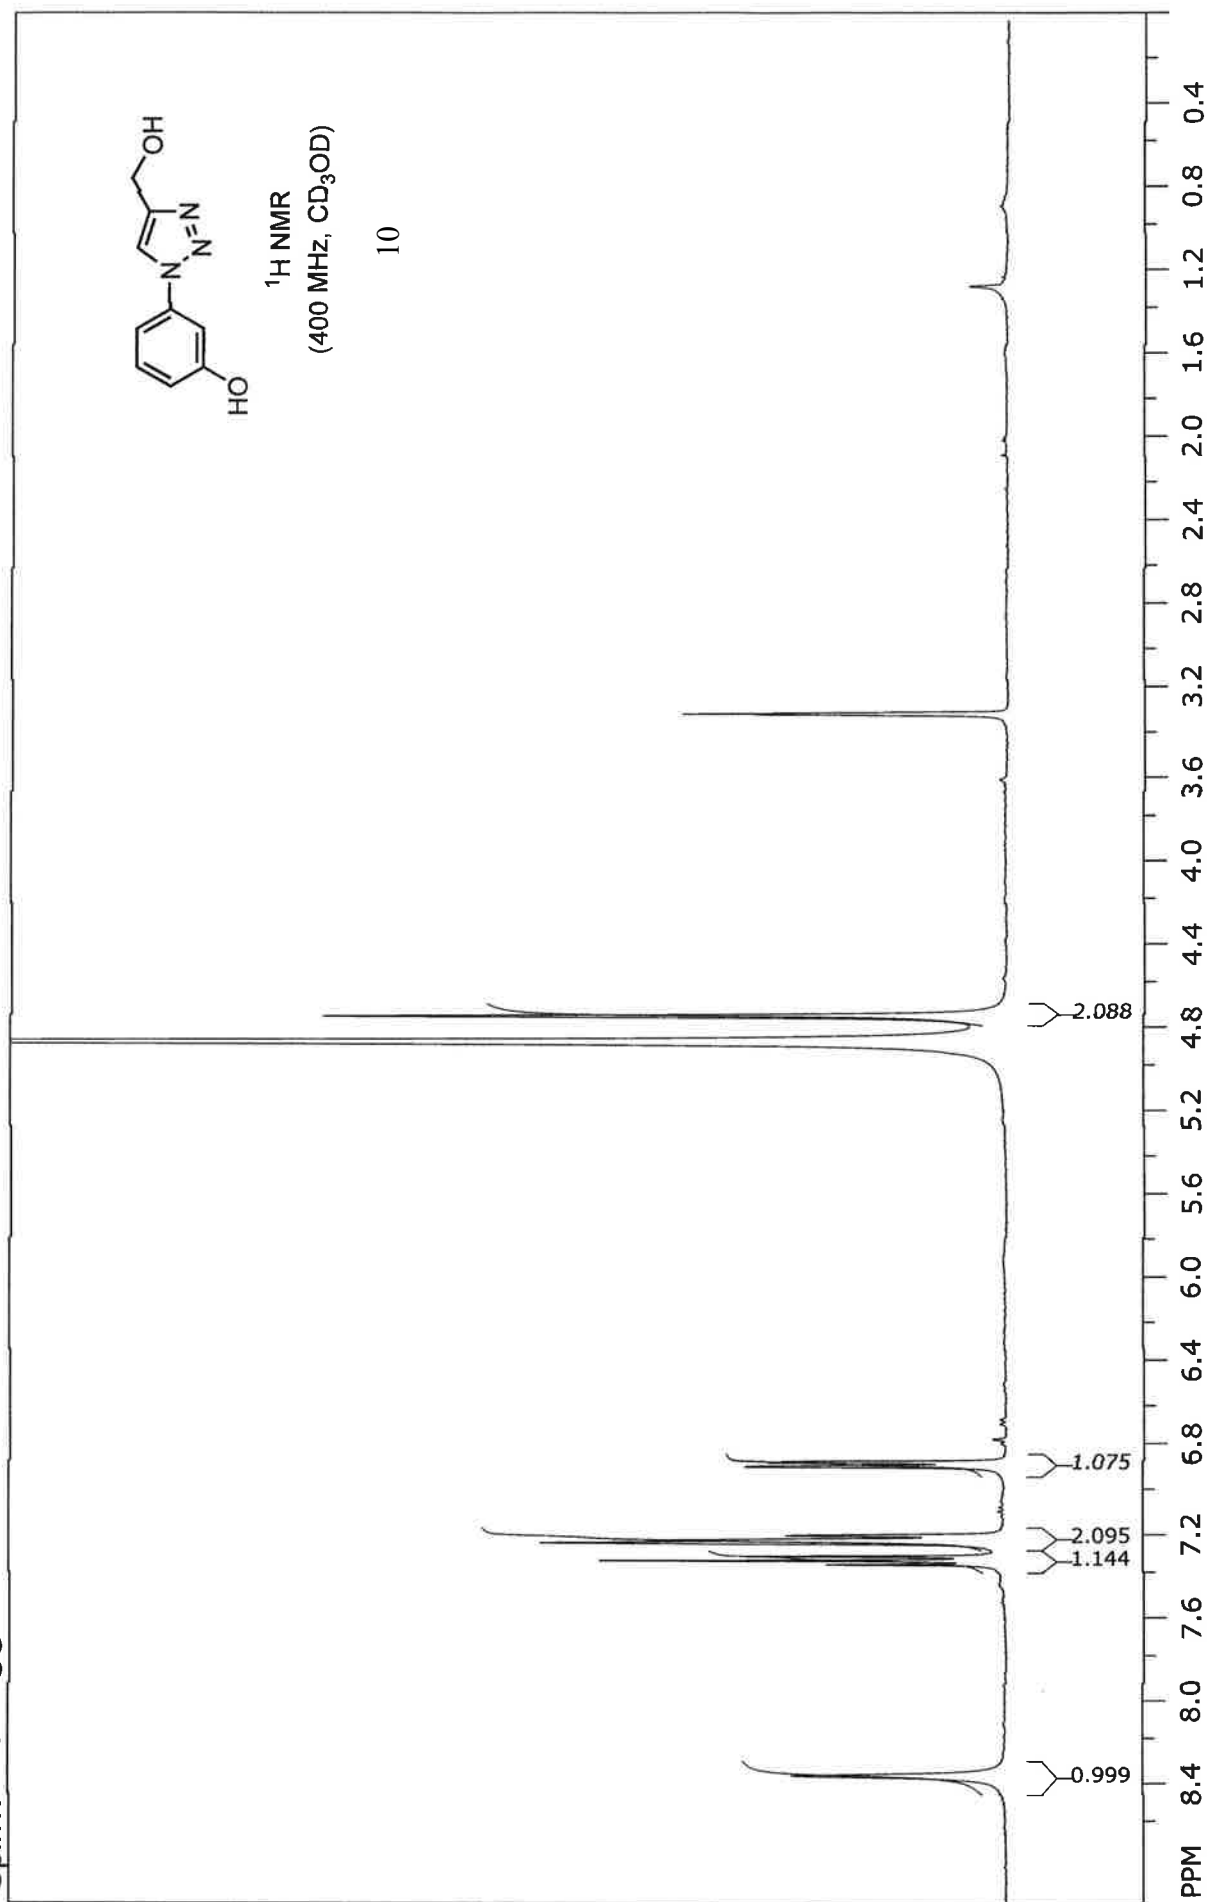

file: ...naldsonw\Desktop\EAW-195-H.fid\fid block# 1 expt: "s2pul"  
transmitter freq.: 399.731815 MHz  
time domain size: 32768 points  
width: 6410.26 Hz = 16.0364 ppm = 0.195626 Hz/pt  
number of scans: 8  
freq. of 0 ppm: 399.729415 MHz  
processed size: 32768 complex points  
LB: 0.500 GF: 0.0000  
Hz/cm: 143.875 ppm/cm: 0.35993

## SpinWorks 4: 13C OBSERVE

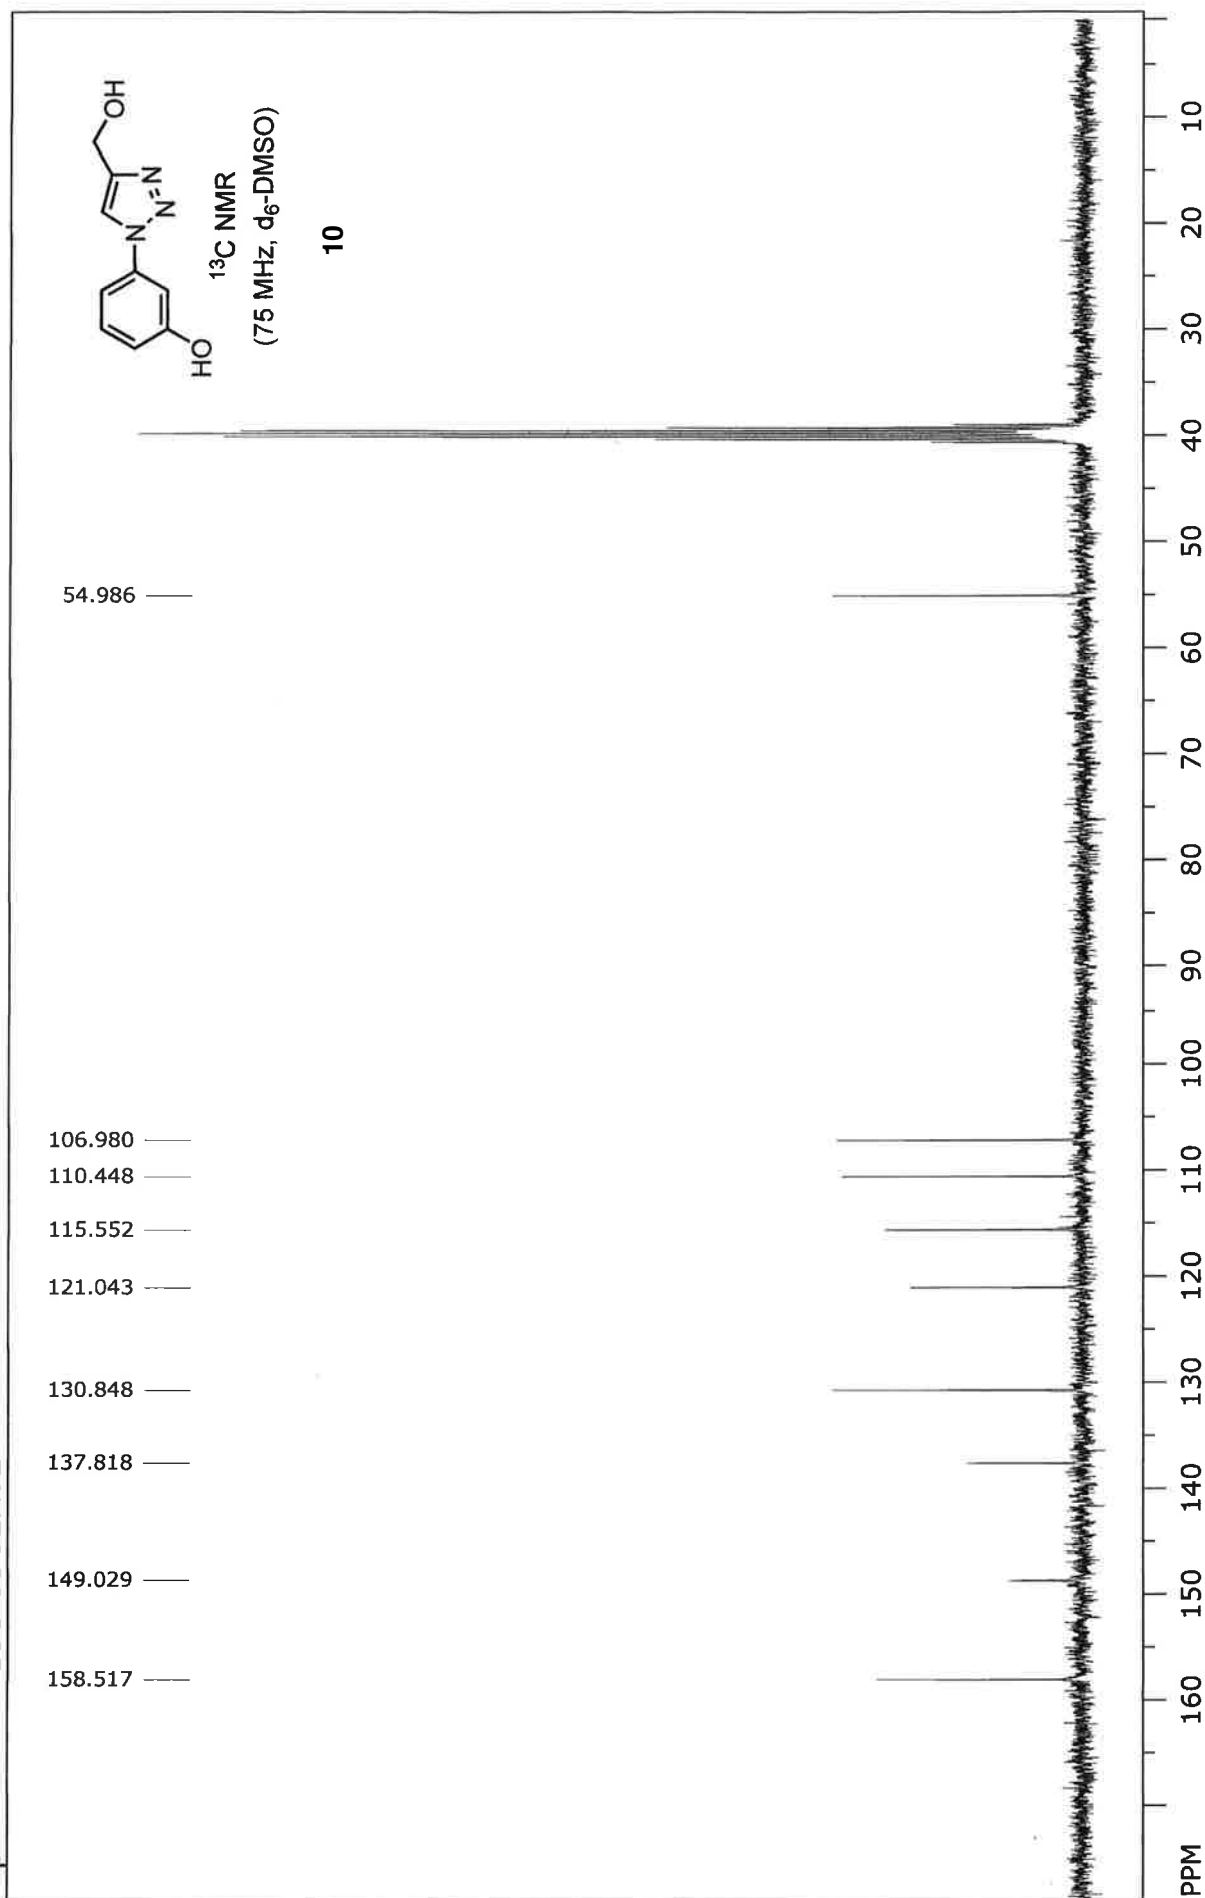

freq. of 0 ppm: 75.468436 MHz  
processed size: 131072 complex points  
LB: 1.500 GF: 0.0000  
Hz/cm: 543.396 ppm/cm: 7.19952

file: ...unds\12\_7\_18\_EAW416\_Carbon.fid\fid block# 1 expt: "s2pul"  
transmitter freq.: 75.476694 MHz  
time domain size: 68492 points  
width: 18867.92 Hz = 249.9835 ppm = 0.275476 Hz/pt  
number of scans: 256

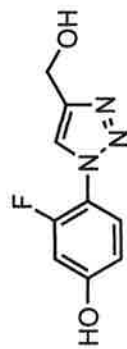

<sup>1</sup>H NMR  
(400 MHz, CD<sub>3</sub>OD)

11

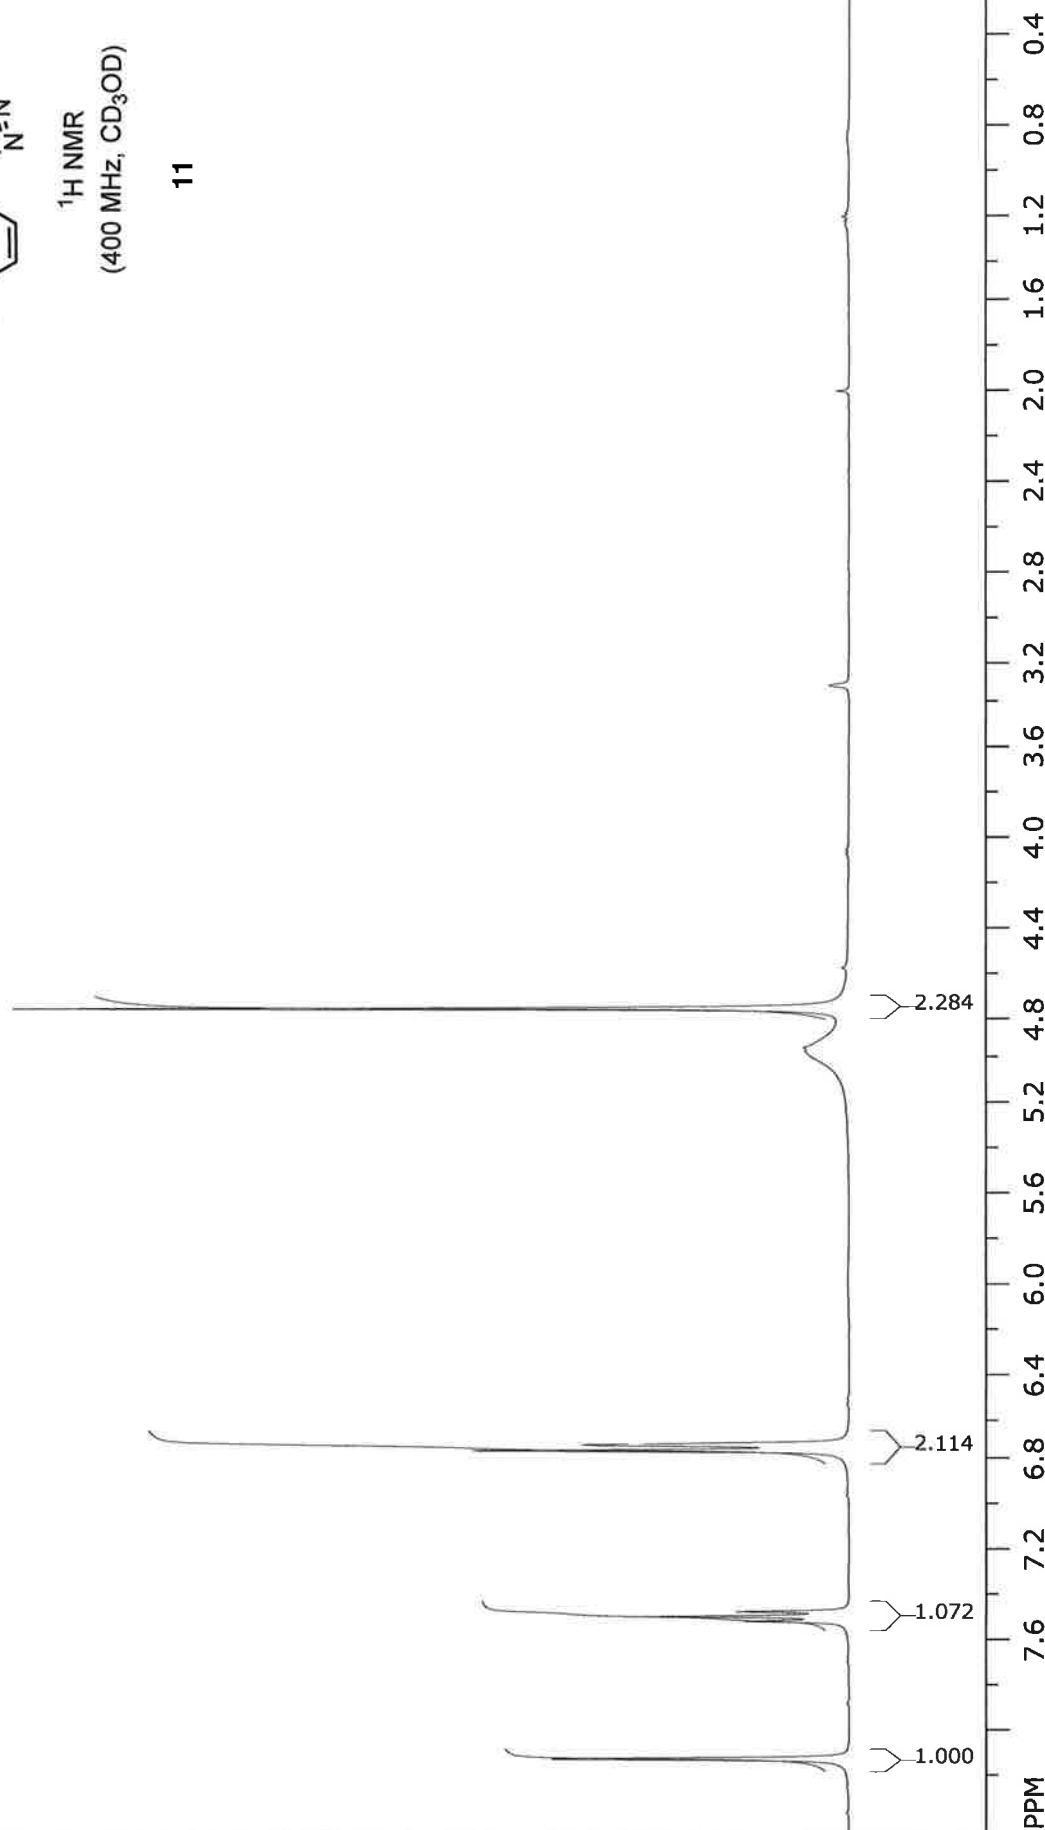

file: ...le Compounds\4\_16\_18\_GCC13.fid\fid block# 1 expt: "s2pul"  
transmitter freq.: 399.735724 MHz  
time domain size: 32768 points  
width: 6410.26 Hz = 16.0362 ppm = 0.195626 Hz/pt  
number of scans: 8  
freq. of 0 ppm: 399.733315 MHz  
processed size: 32768 complex points  
LB: 0.500 GF: 0.0000  
Hz/cm: 135.897 ppm/cm: 0.33997

## SpinWorks 4: 4\_16\_18\_Gcc13CARBON

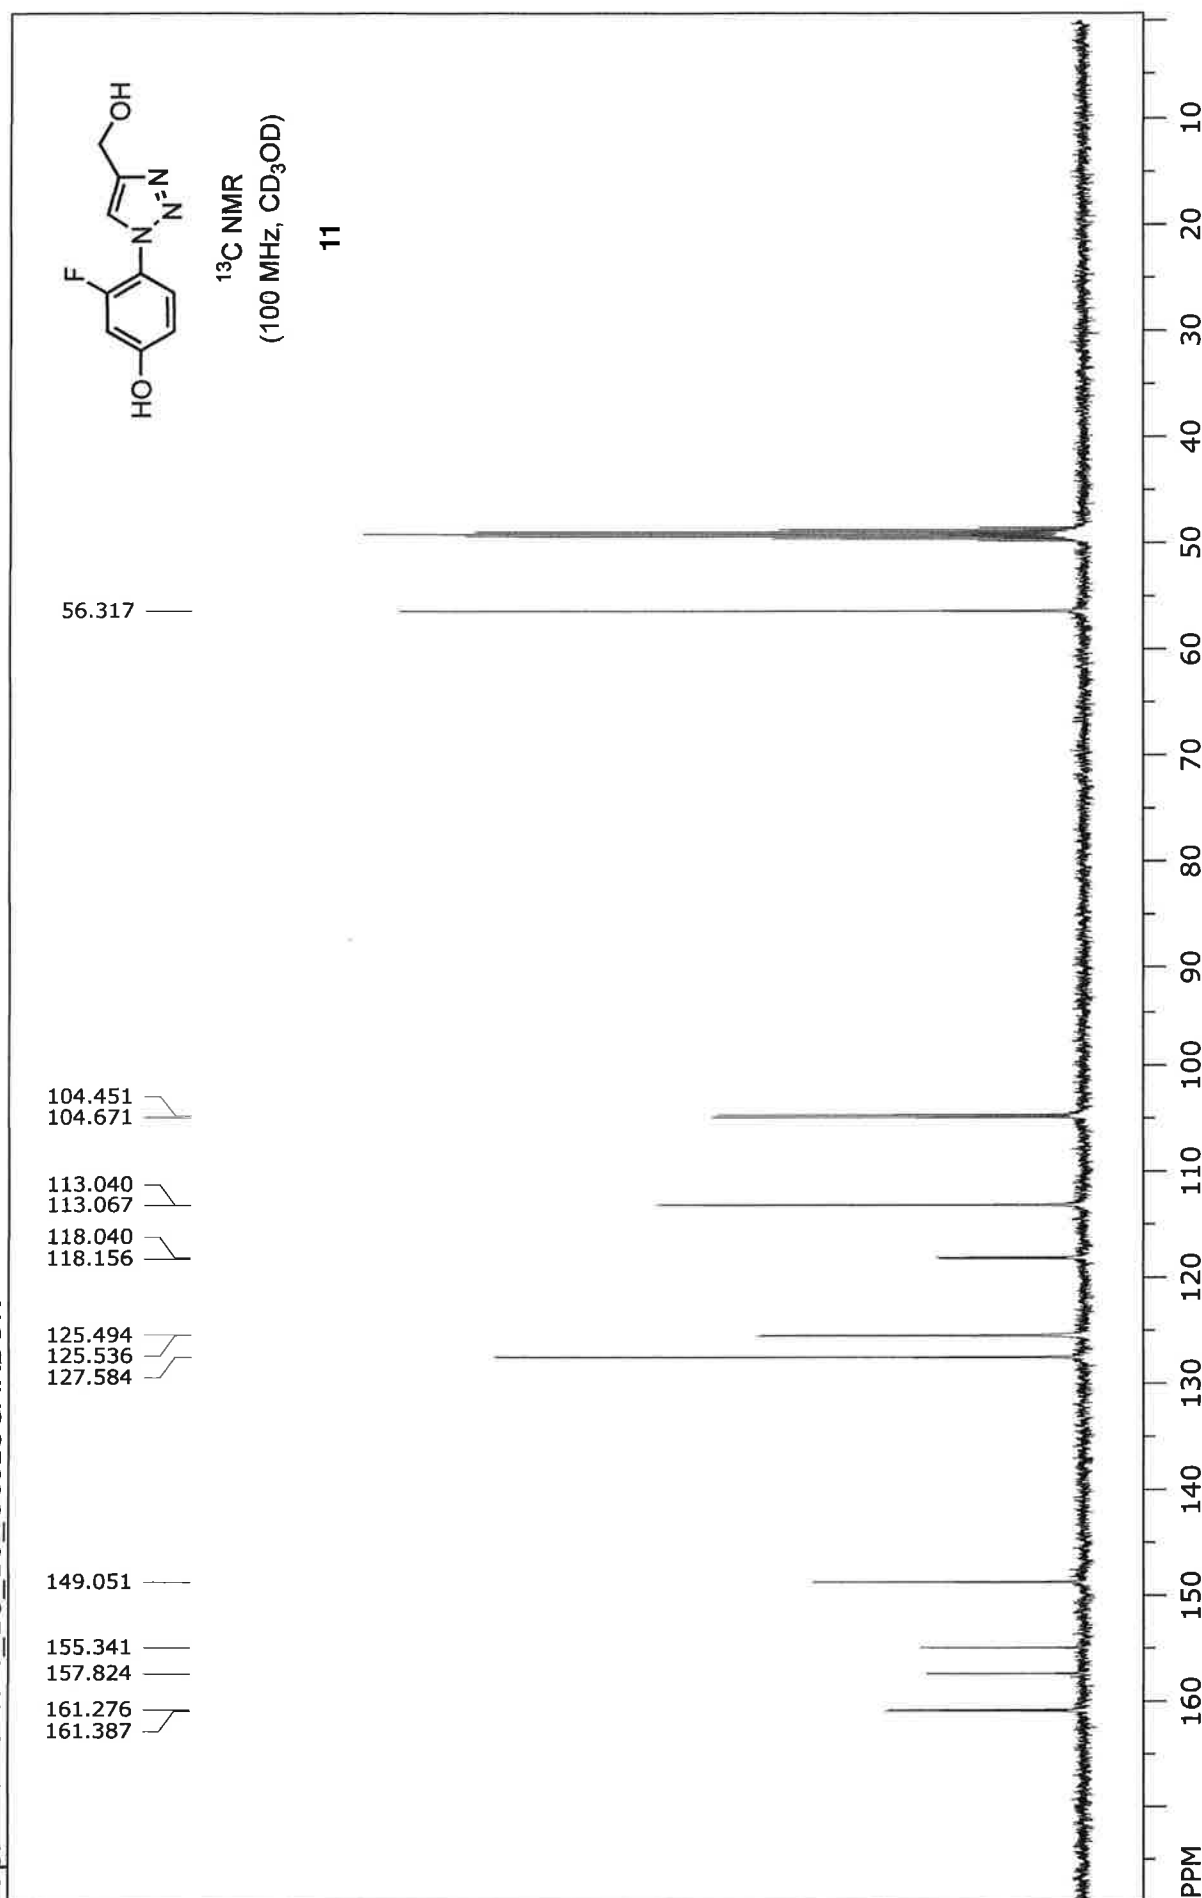

file: ...pounds\4\_16\_18\_GCC13CARBON.fid\fid block# 1 expt: "s2pul"  
transmitter freq.: 100.524081 MHz  
time domain size: 65536 points  
width: 25000.00 Hz = 248.6966 ppm = 0.381470 Hz/pt  
number of scans: 256

freq. of 0 ppm: 100.512889 MHz  
processed size: 65536 complex points  
LB: 1.500 GF: 0.0000  
Hz/cm: 723.889 ppm/cm: 7.20115

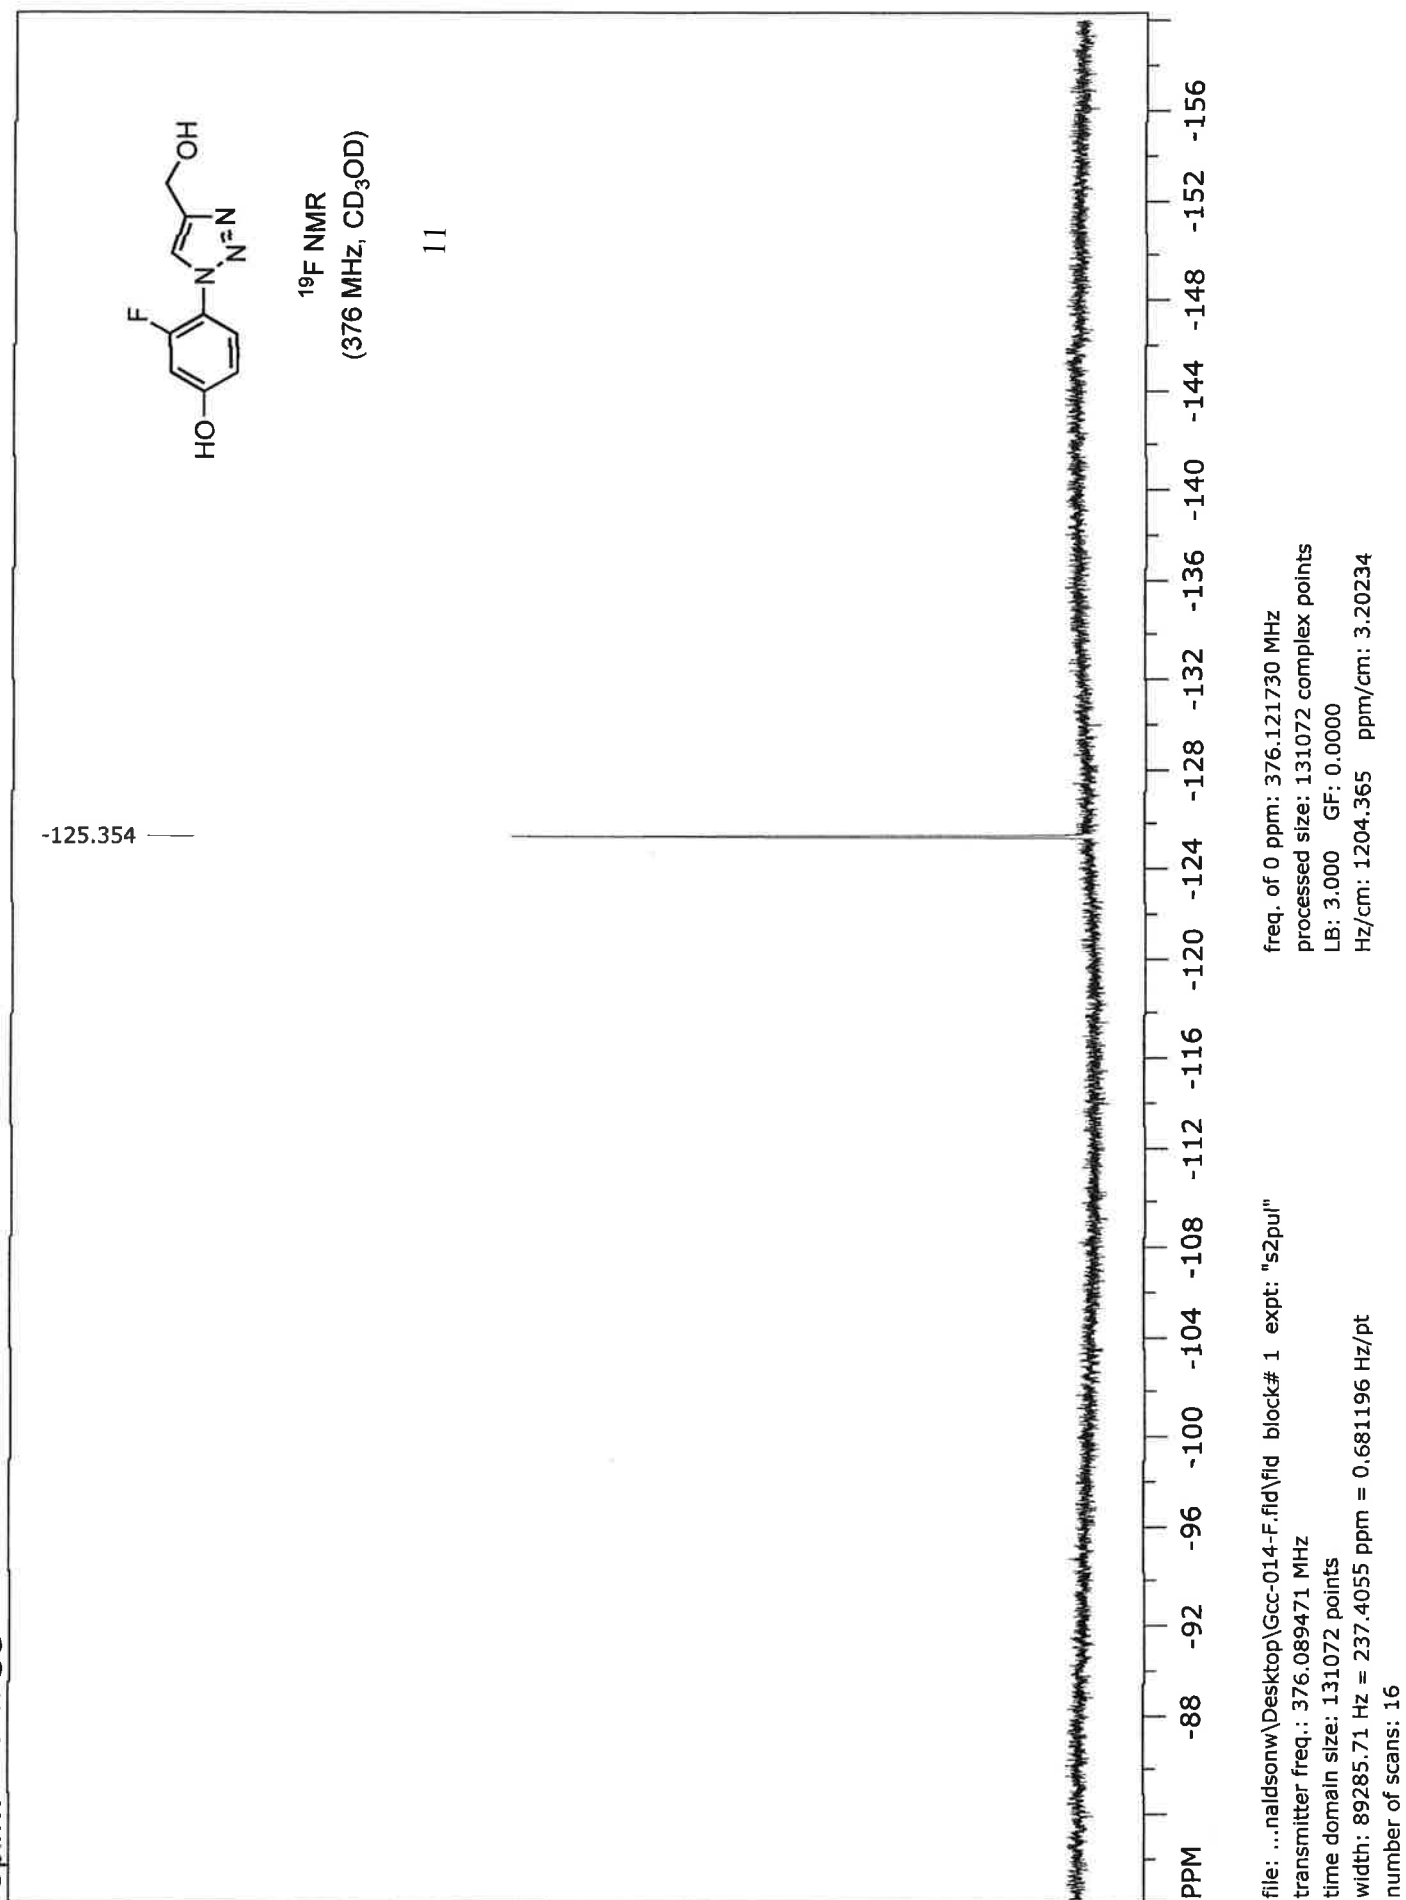

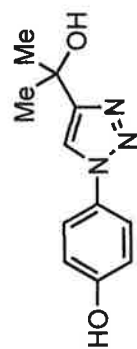

<sup>1</sup>H NMR  
(400 MHz, CD<sub>3</sub>OD)

12

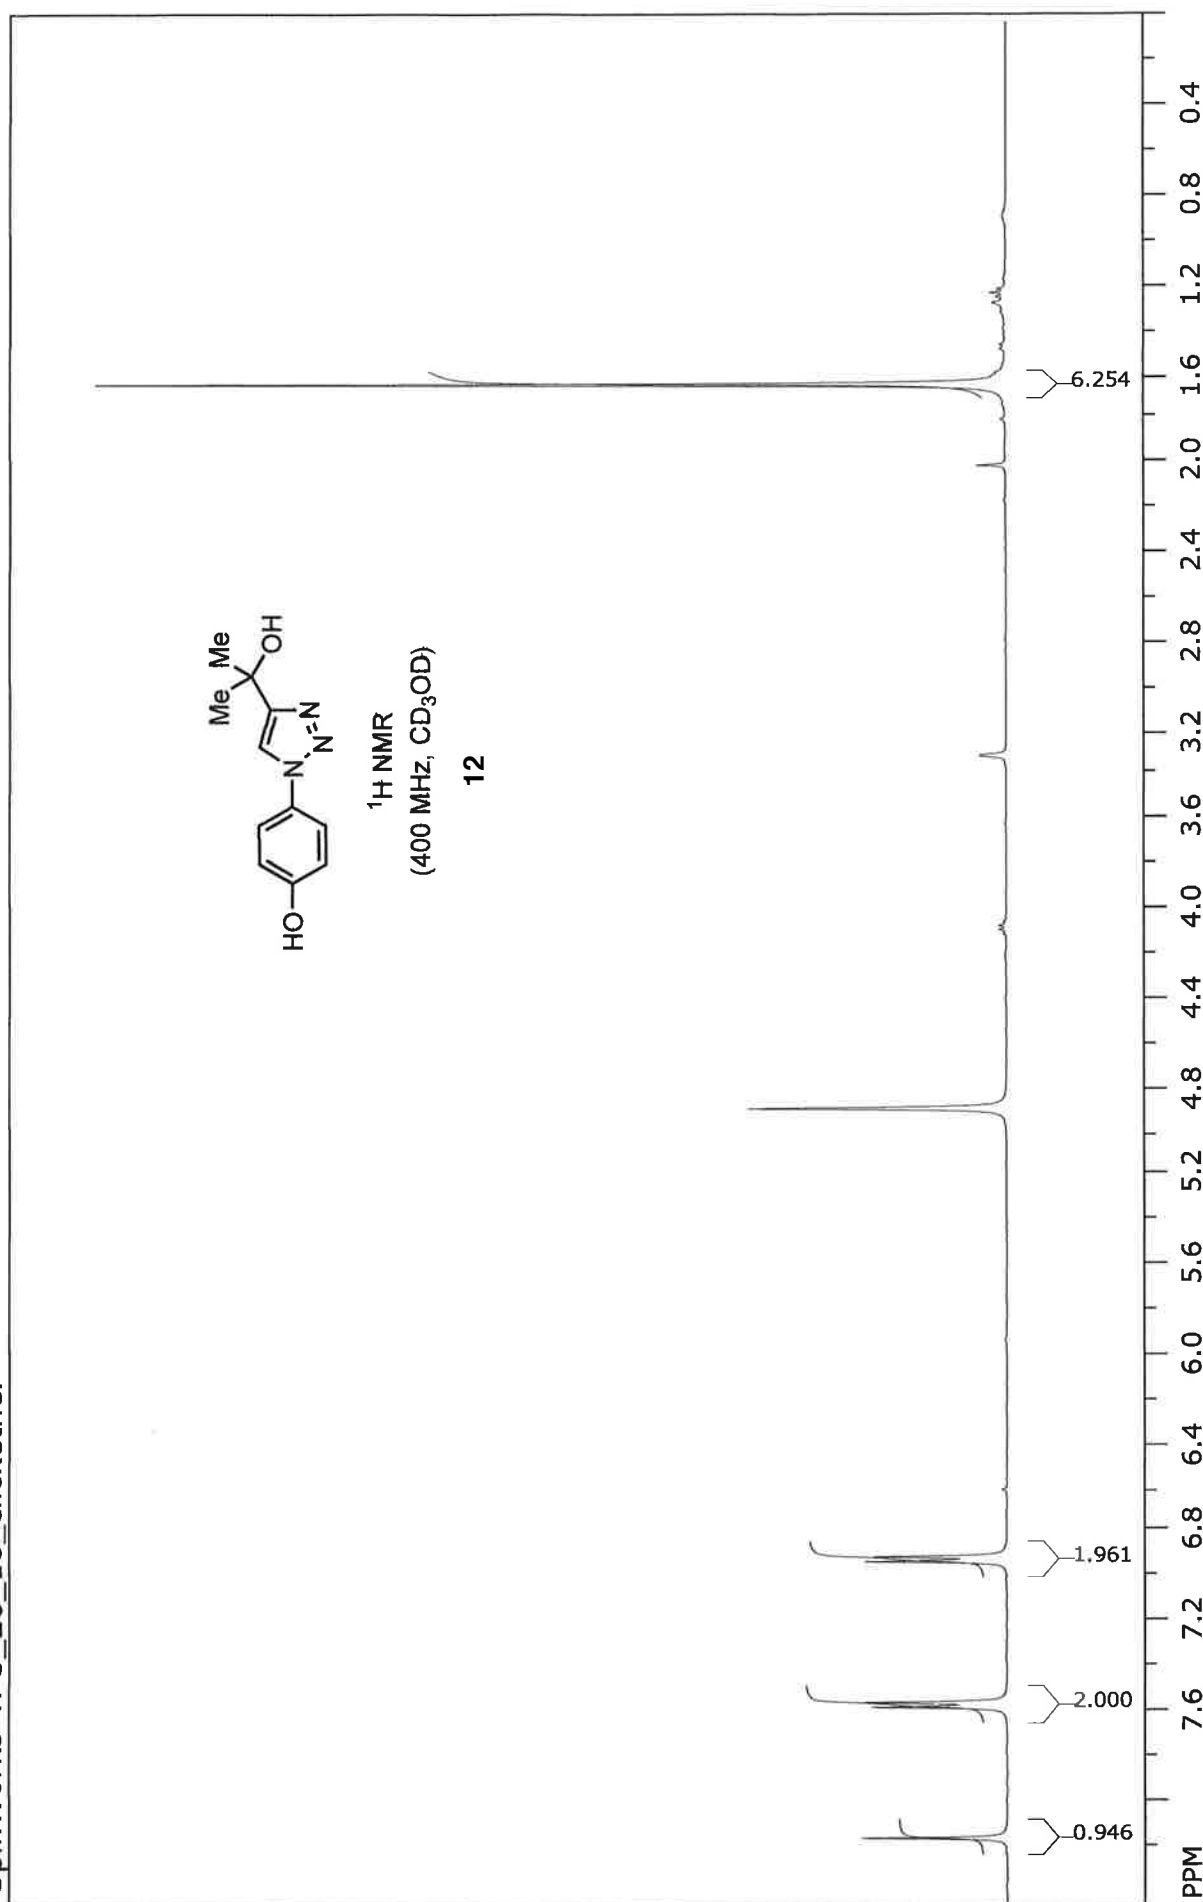

file: ...mpounds\3\_26\_18\_clickether.fid block# 1 expt: "s2pul"  
transmitter freq.: 399.735724 MHz  
time domain size: 32768 points  
width: 6410.26 Hz = 16.0362 ppm = 0.195626 Hz/pt  
number of scans: 8

freq. of 0 ppm: 399.733316 MHz  
processed size: 32768 complex points  
LB: 1.500 GF: 0.0000  
Hz/cm: 135.897 ppm/cm: 0.33997

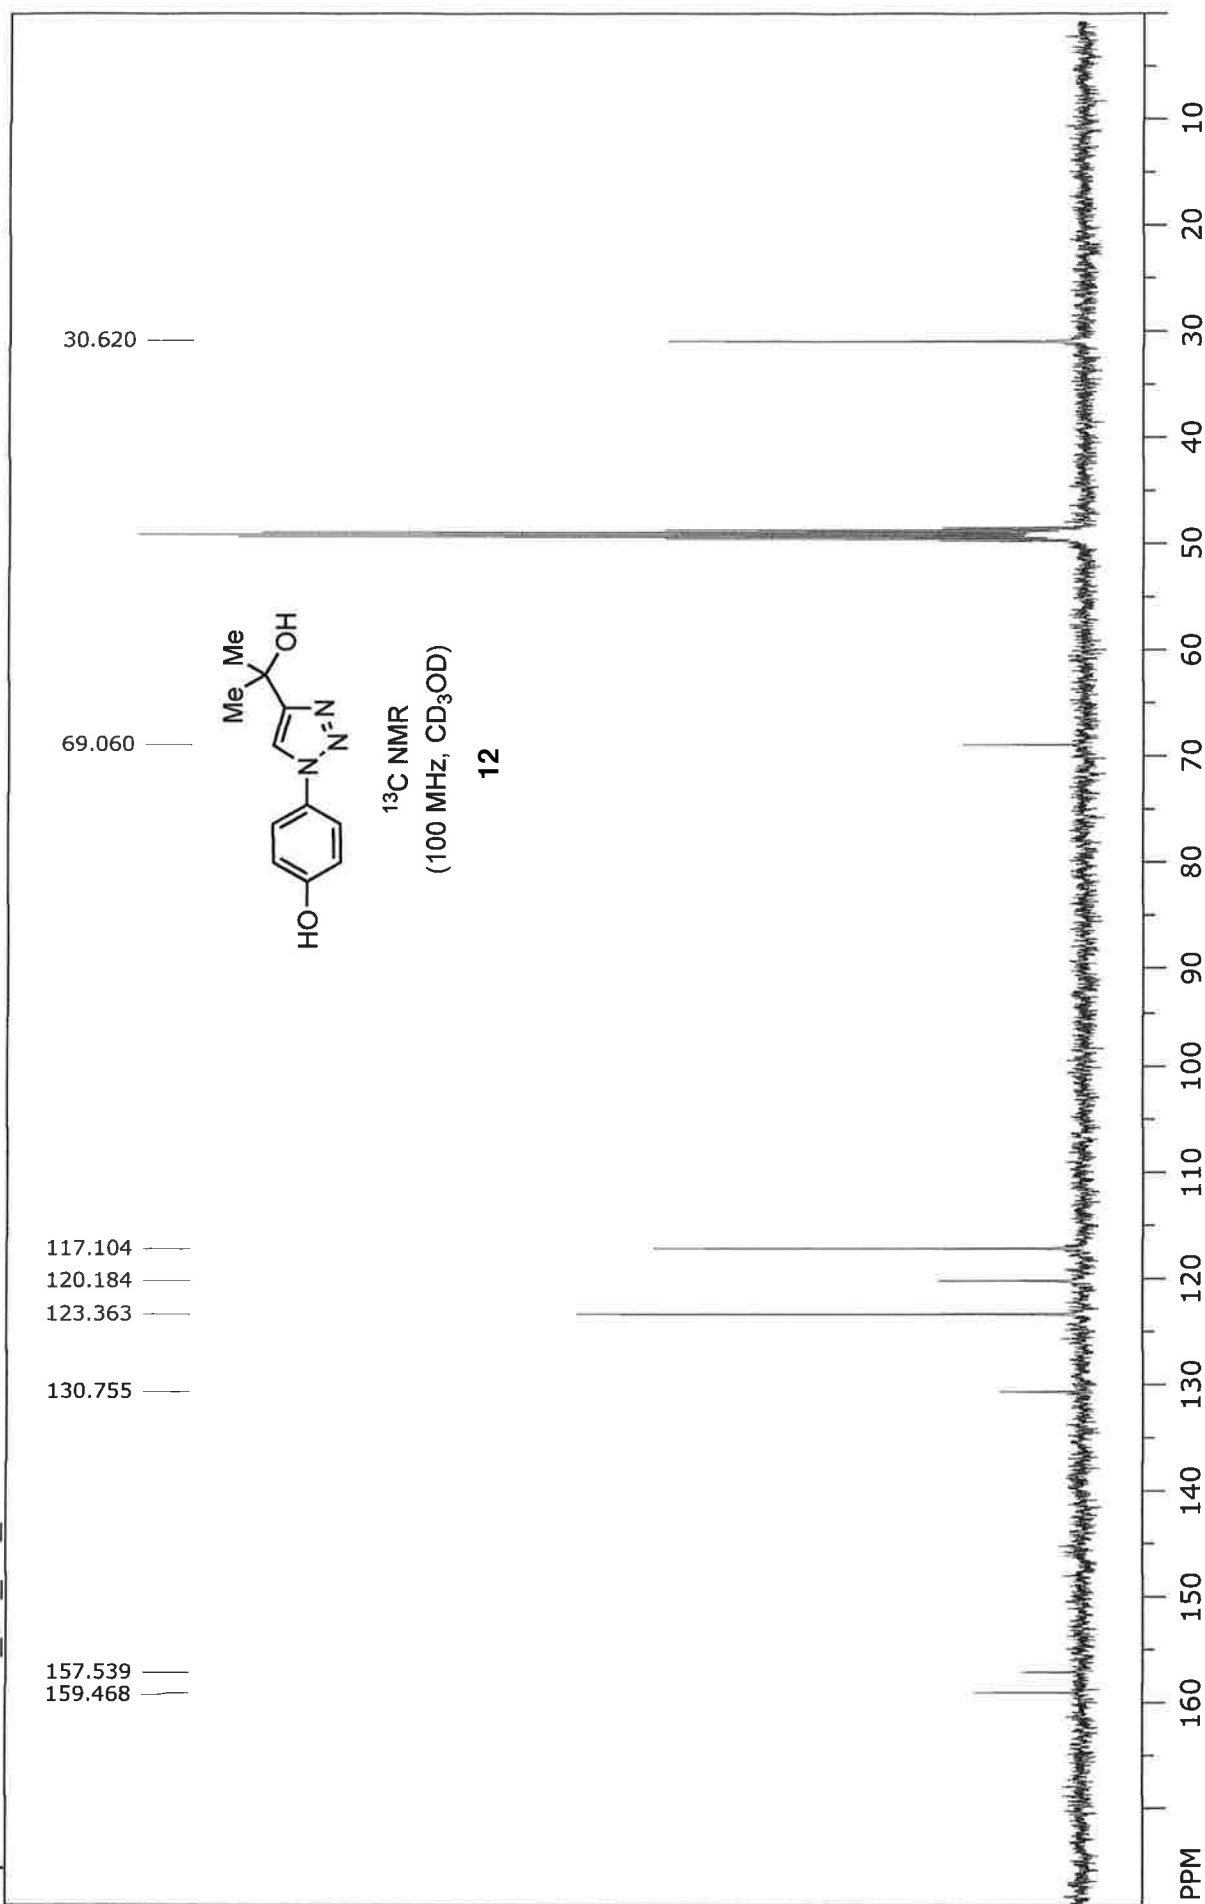

file: ...s\3\_26\_18\_clicketherCARBON.fid\fid block# 1 expt: "s2pul"  
transmitter freq.: 100.524081 MHz  
time domain size: 65536 points  
width: 25000.00 Hz = 248.6966 ppm = 0.381470 Hz/pt  
number of scans: 256  
freq. of 0 ppm: 100.512882 MHz  
processed size: 65536 complex points  
LB: 2.500 GF: 0.0000  
Hz/cm: 723.333 ppm/cm: 7.19562

# SpinWorks 4: STANDARD 1H OBSERVE

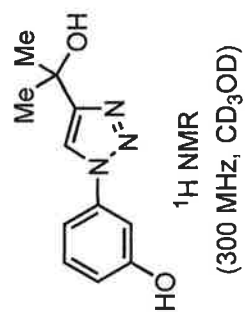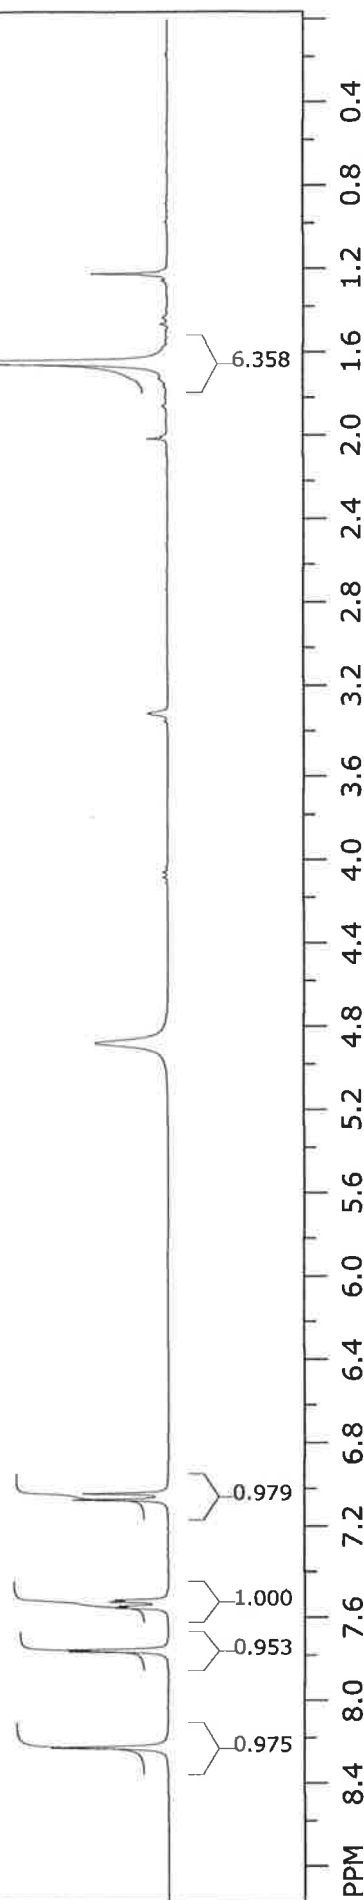

file: ...e Compounds\4\_5\_18\_Sample1.fid\fid block# 1 expt: "s2pul"  
 transmitter freq.: 300.134191 MHz  
 time domain size: 19192 points  
 width: 4803.07 Hz = 16.0031 ppm = 0.250264 Hz/pt  
 number of scans: 8

freq. of 0 ppm: 300.132388 MHz  
 processed size: 32768 complex points  
 LB: 1.500 GF: 0.0000  
 Hz/cm: 108.123 ppm/cm: 0.36025



## SpinWorks 4: 13C OBSERVE

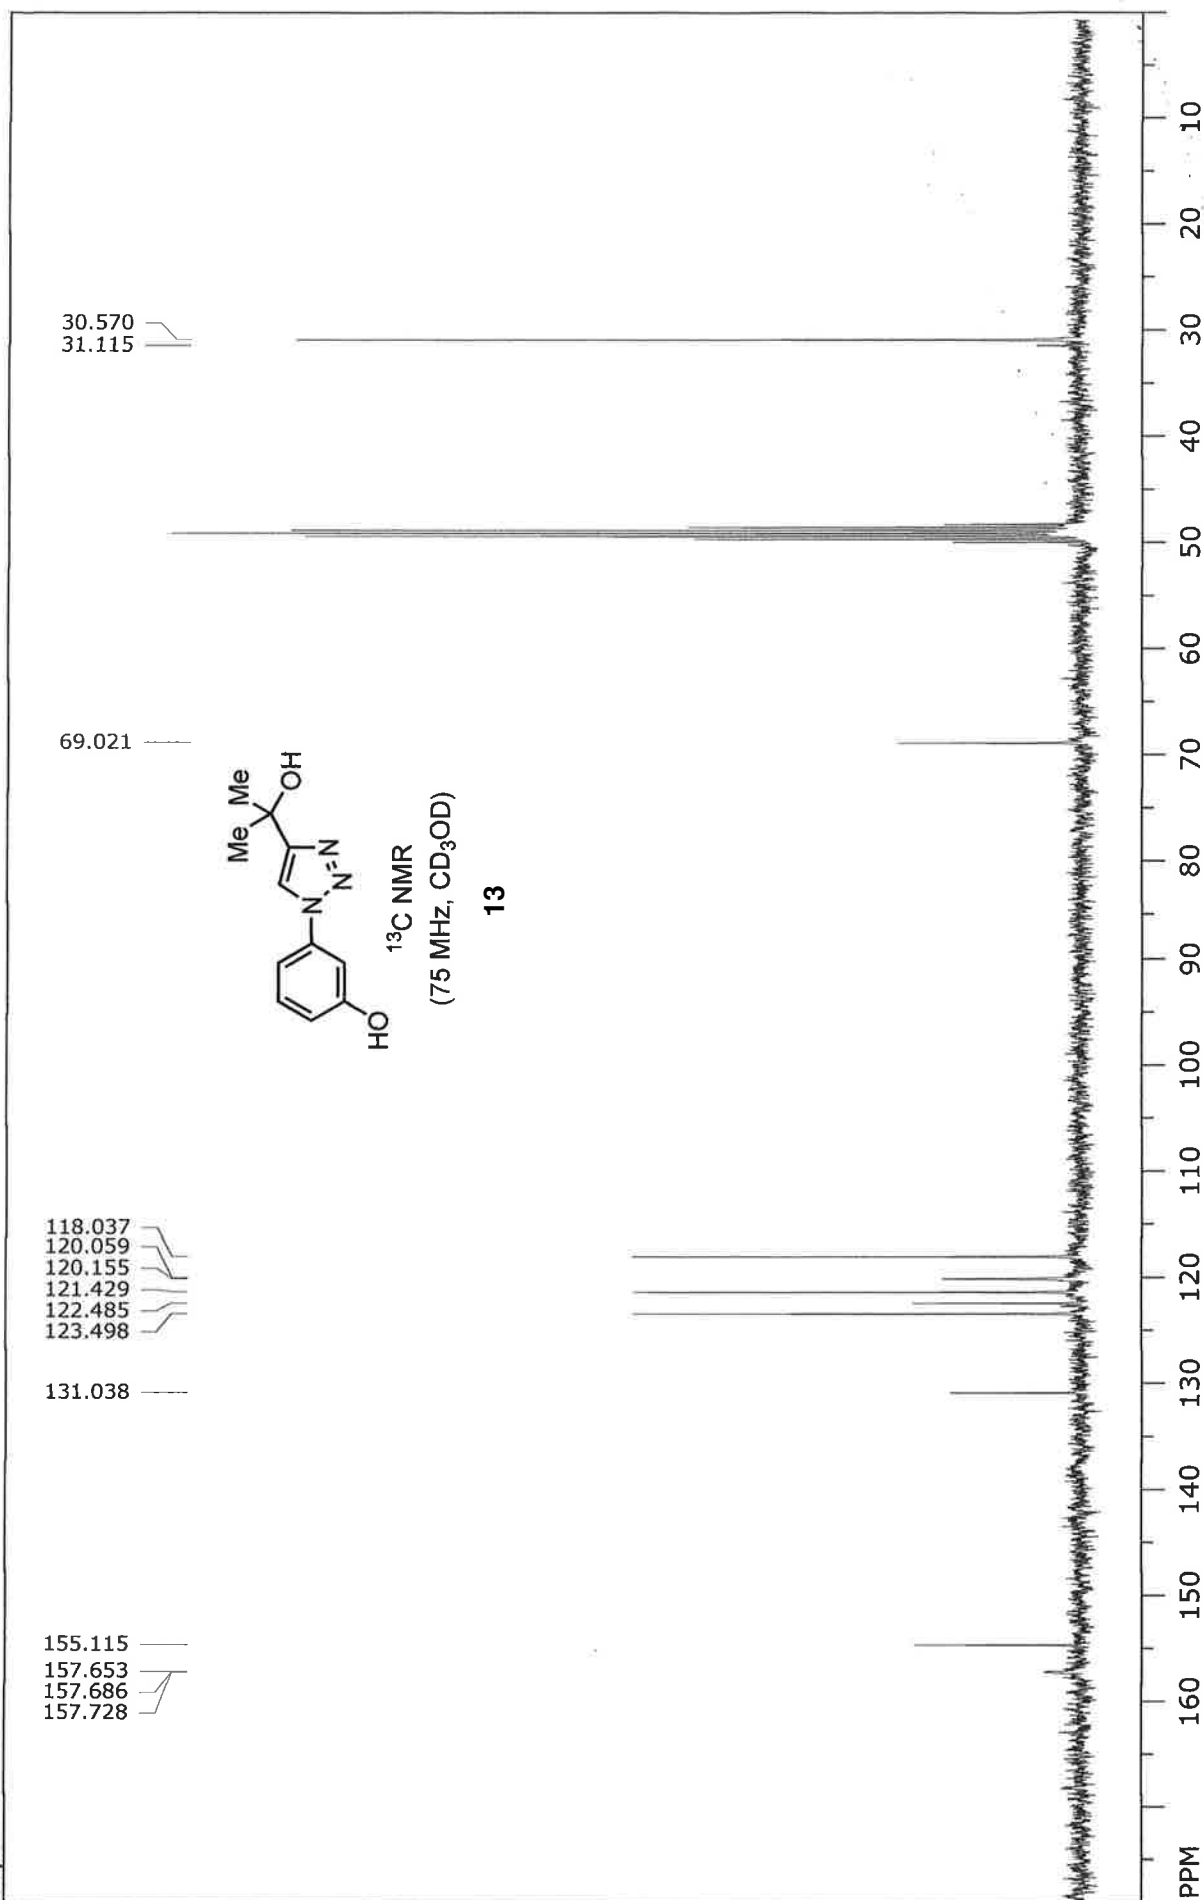

file: ...ounds\4\_5\_18\_sample1\CARBON.fid\fid block# 1 expt: "s2pul"  
transmitter freq.: 75.476633 MHz  
time domain size: 68492 points  
width: 18867.92 Hz = 249.9837 ppm = 0.275476 Hz/pt  
number of scans: 64  
freq. of 0 ppm: 75.468245 MHz  
processed size: 131072 complex points  
LB: 2.000 GF: 0.0000  
Hz/cm: 543.396 ppm/cm: 7.19953

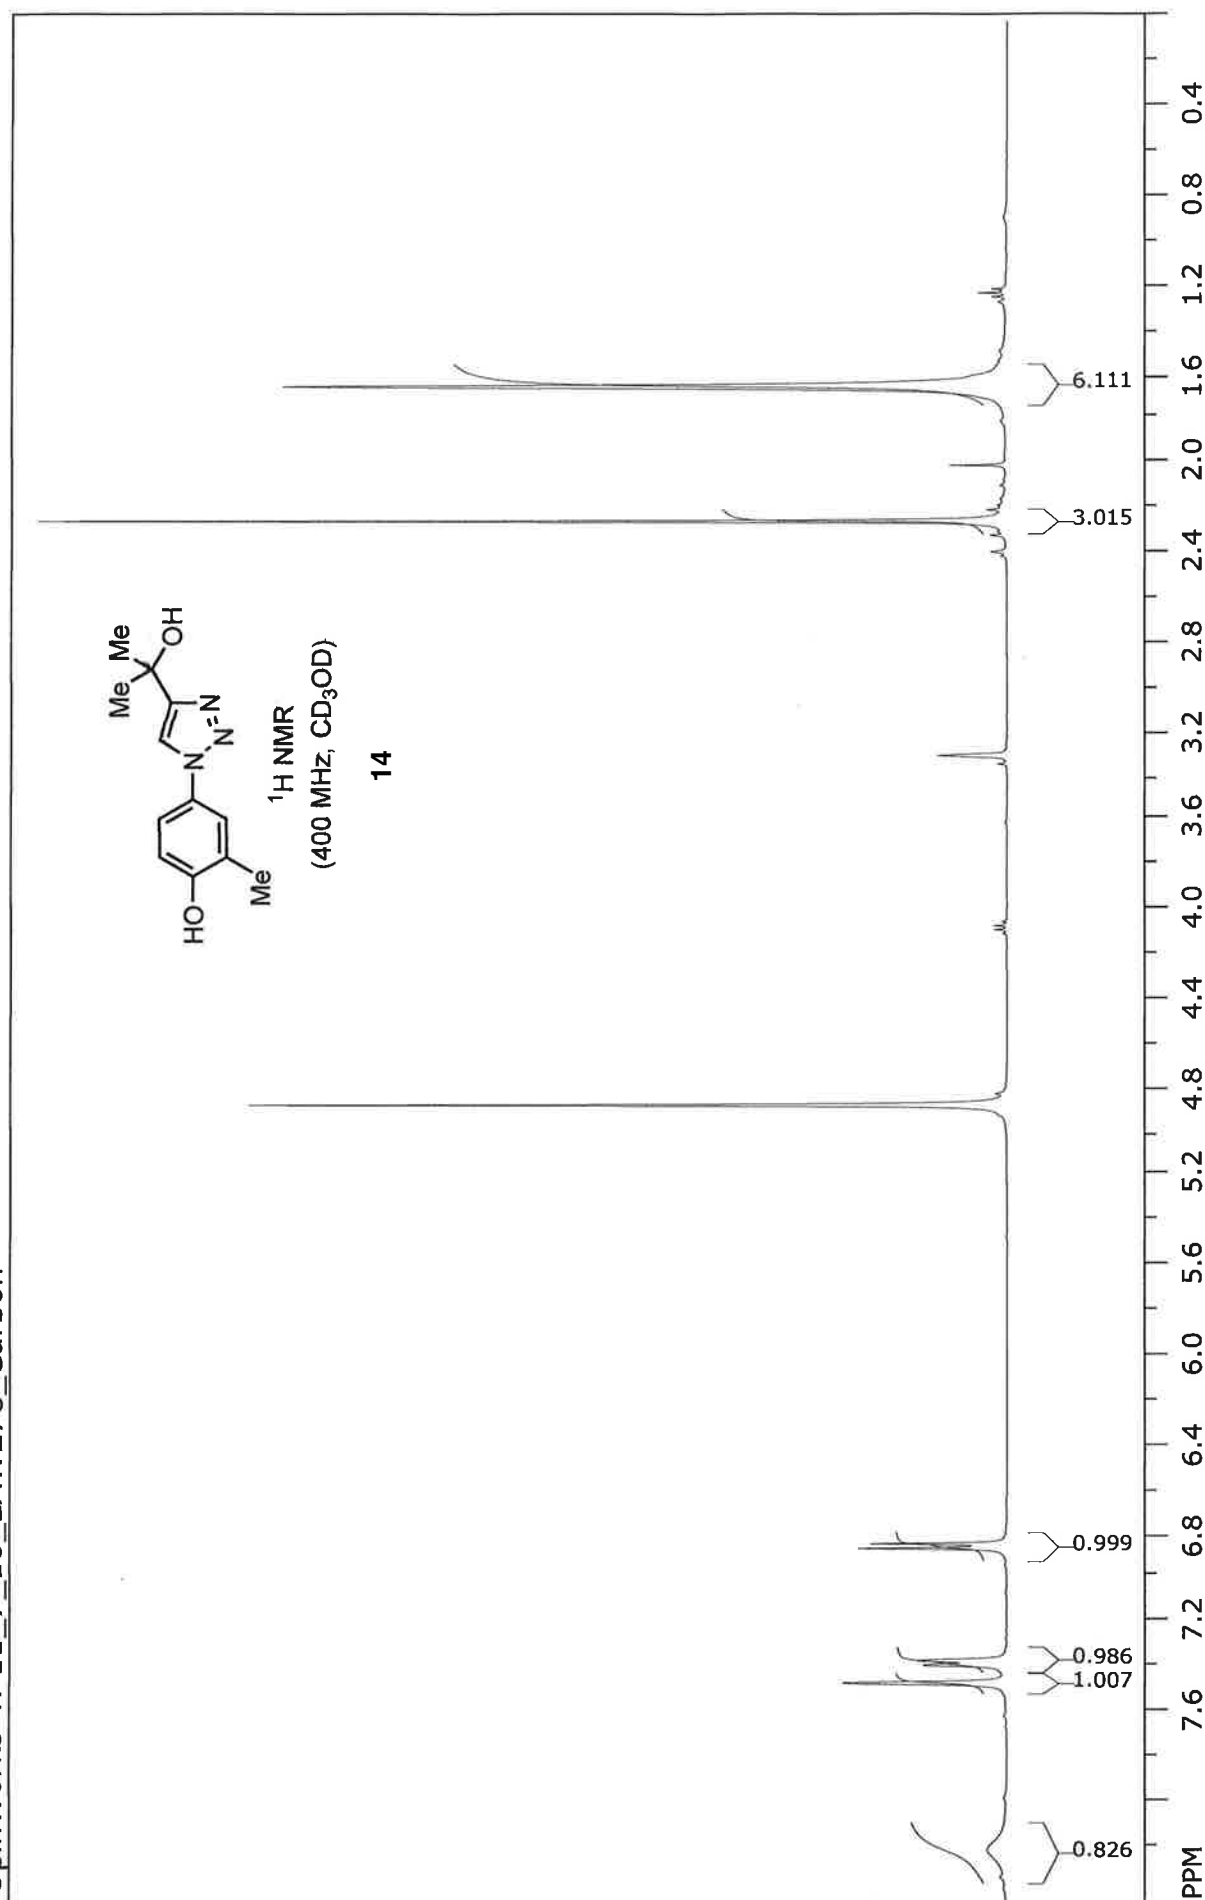

file: ...unds\10\_7\_18\_EAW278\_Proton.fid\fid block# 1 expt: "s2pul"  
transmitter freq.: 399.735724 MHz  
time domain size: 32768 points  
width: 6410.26 Hz = 16.0362 ppm = 0.195626 Hz/pt  
number of scans: 8

freq. of 0 ppm: 399.733317 MHz  
processed size: 32768 complex points  
LB: 1.500 GF: 0.0000  
Hz/cm: 135.897 ppm/cm: 0.33997

## SpinWorks 4: 11\_7\_18\_Eaw2878Carbon

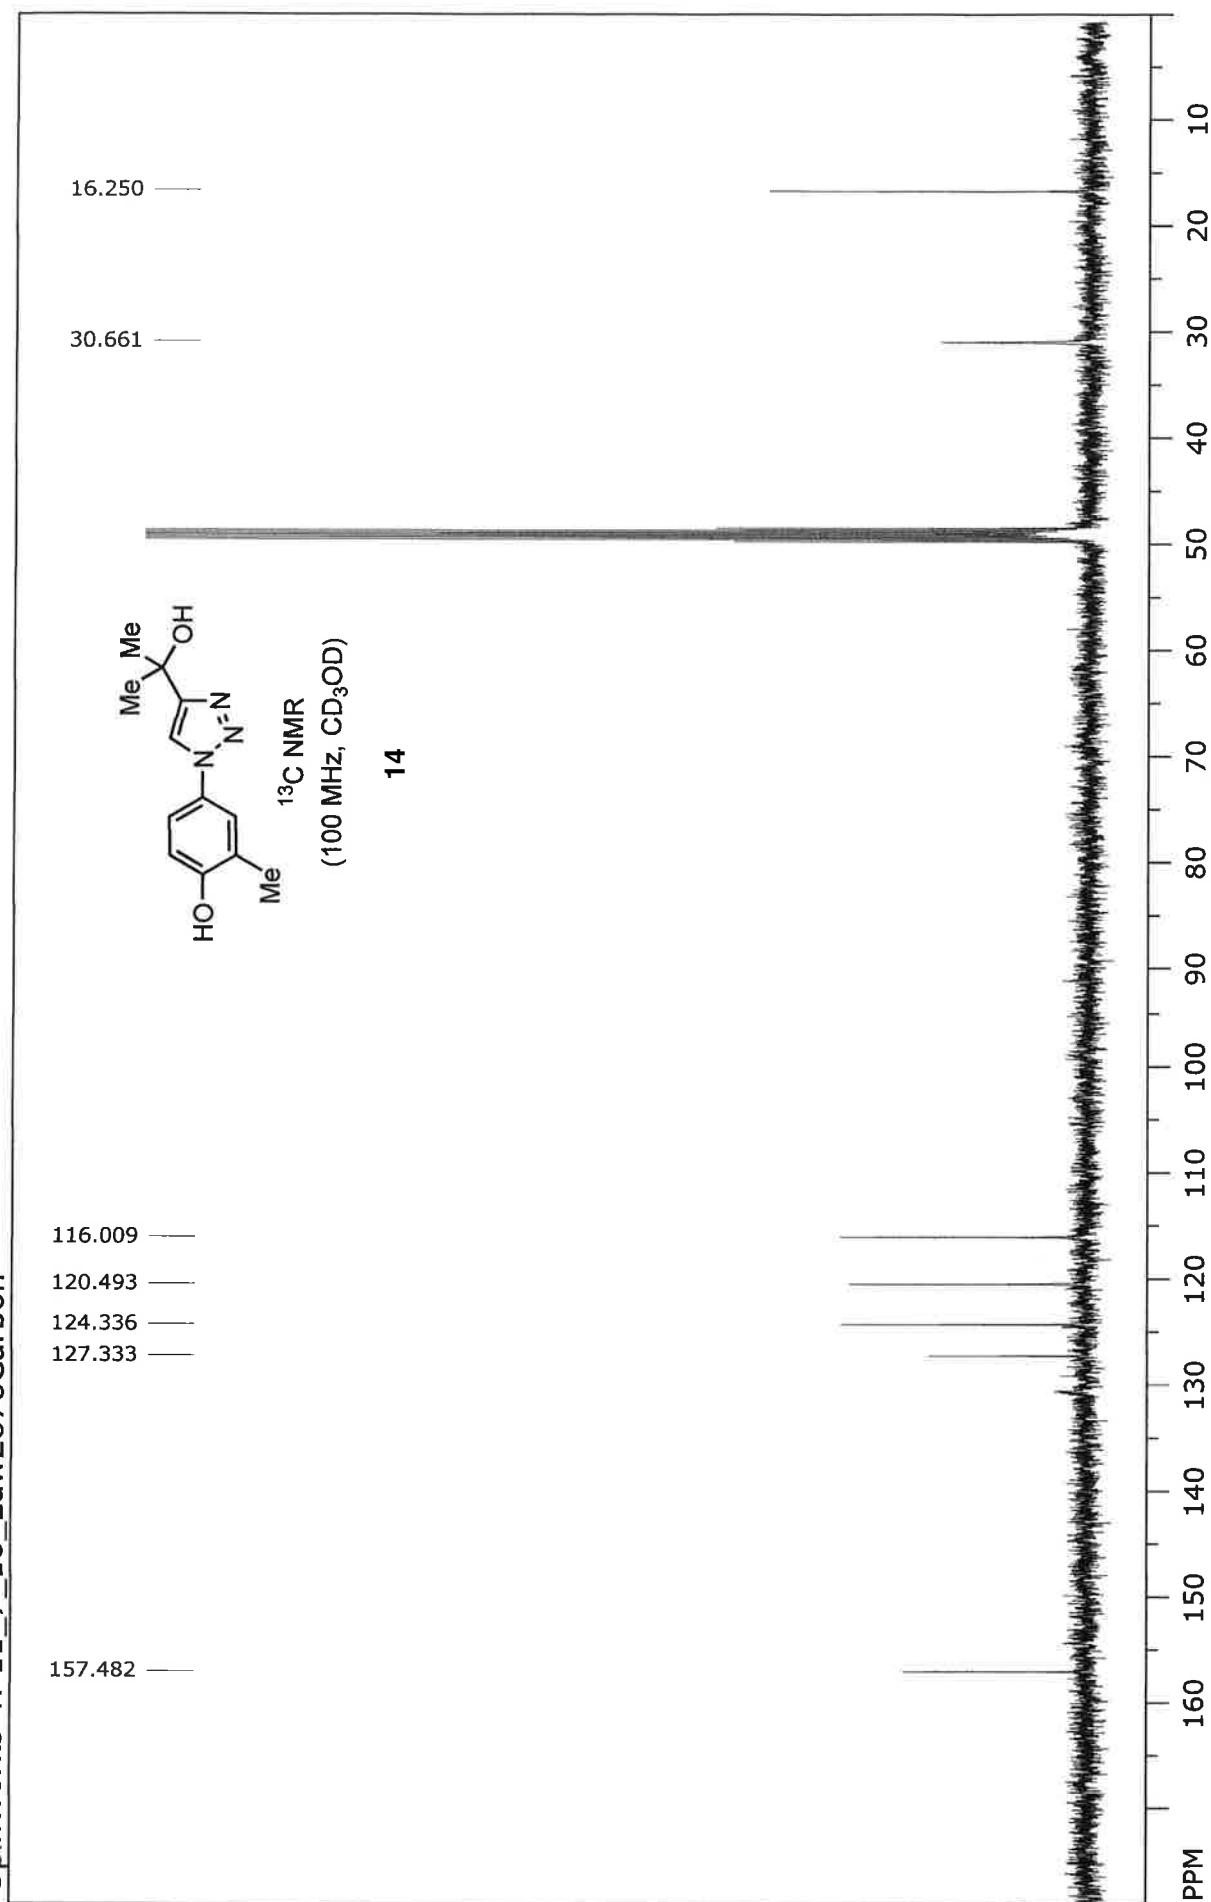

file: ...unds\10\_7\_18\_EAW278\_Carbon.fid\fid block# 1 expt: "s2pul"  
transmitter freq.: 100.524081 MHz  
time domain size: 65536 points  
width: 25000.00 Hz = 248.6966 ppm = 0.381470 Hz/pt  
number of scans: 256  
freq. of 0 ppm: 100.512881 MHz  
processed size: 65536 complex points  
LB: 1.500 GF: 0.0000  
Hz/cm: 723.333 ppm/cm: 7.19562

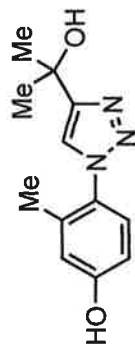

<sup>1</sup>H NMR  
(400 MHz, CD<sub>3</sub>OD)

15

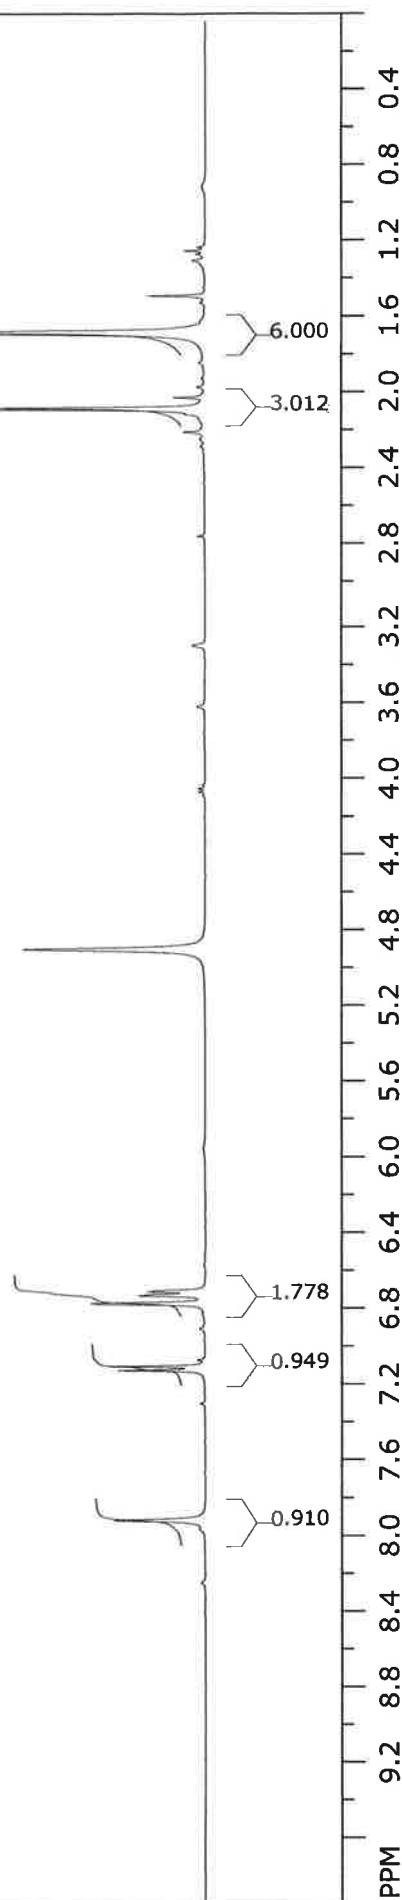

file: ... Compounds\3\_29\_18\_sample1.fid\fid block# 1 expt: "s2pul"  
transmitter freq.: 399.735724 MHz  
time domain size: 32768 points  
width: 6410.26 Hz = 16.0362 ppm = 0.195626 Hz/pt  
number of scans: 8  
freq. of 0 ppm: 399.733316 MHz  
processed size: 32768 complex points  
LB: 1.500 GF: 0.0000  
Hz/cm: 159.829 ppm/cm: 0.39984

## SpinWorks 4: 13C OBSERVE

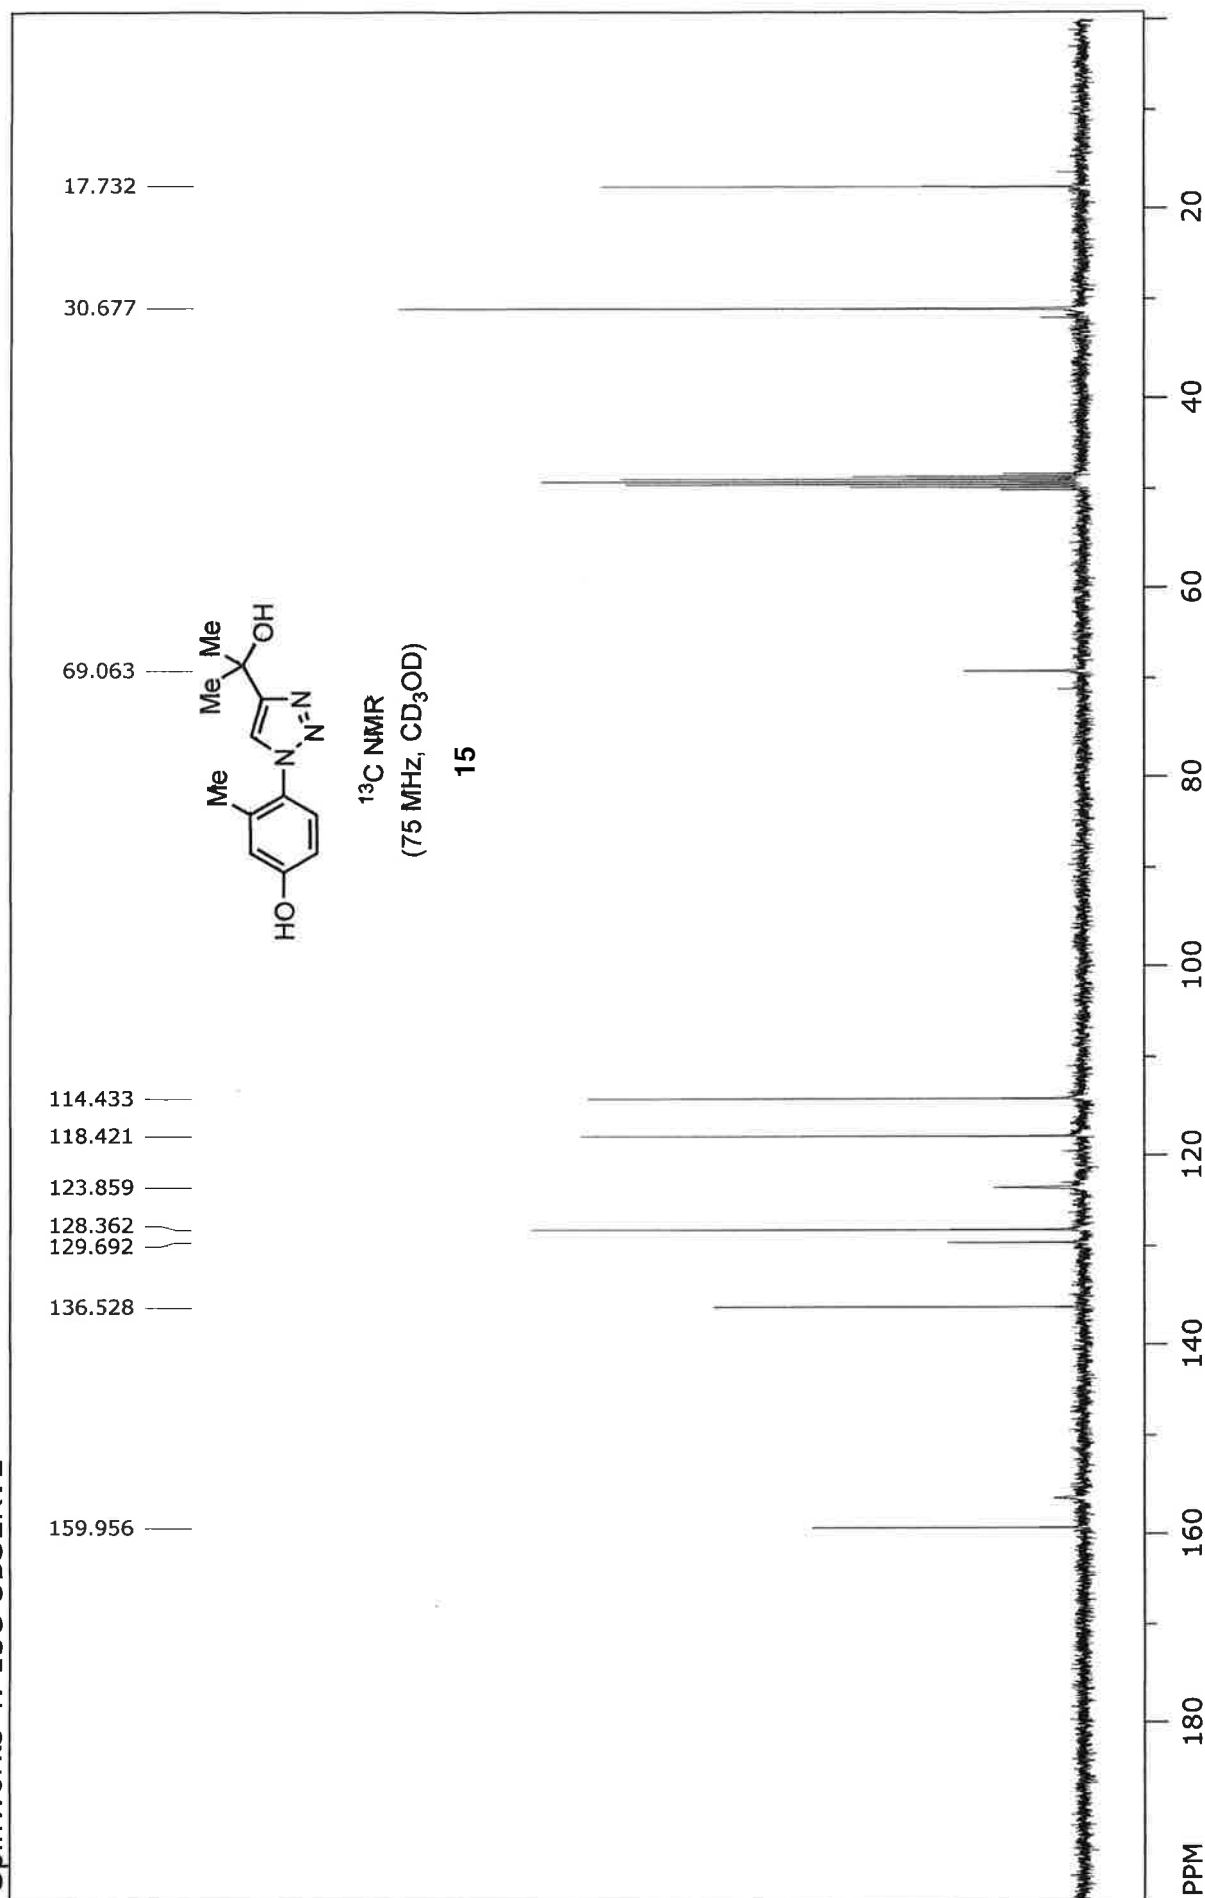

file: ...unds\3\_30\_18\_Sample1\CARBON.fid\fid block# 1 expt: "s2pul"  
 transmitter freq.: 75.476633 MHz  
 time domain size: 68492 points  
 width: 18867.92 Hz = 249.9837 ppm = 0.275476 Hz/pt  
 number of scans: 128

freq. of 0 ppm: 75.468249 MHz  
 processed size: 131072 complex points  
 LB: 1.000 GF: 0.0000  
 Hz/cm: 603.774 ppm/cm: 7.99948

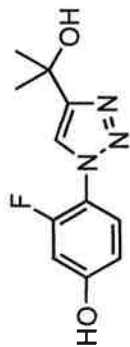

<sup>1</sup>H NMR  
(400 MHz, CD<sub>3</sub>OD)

16

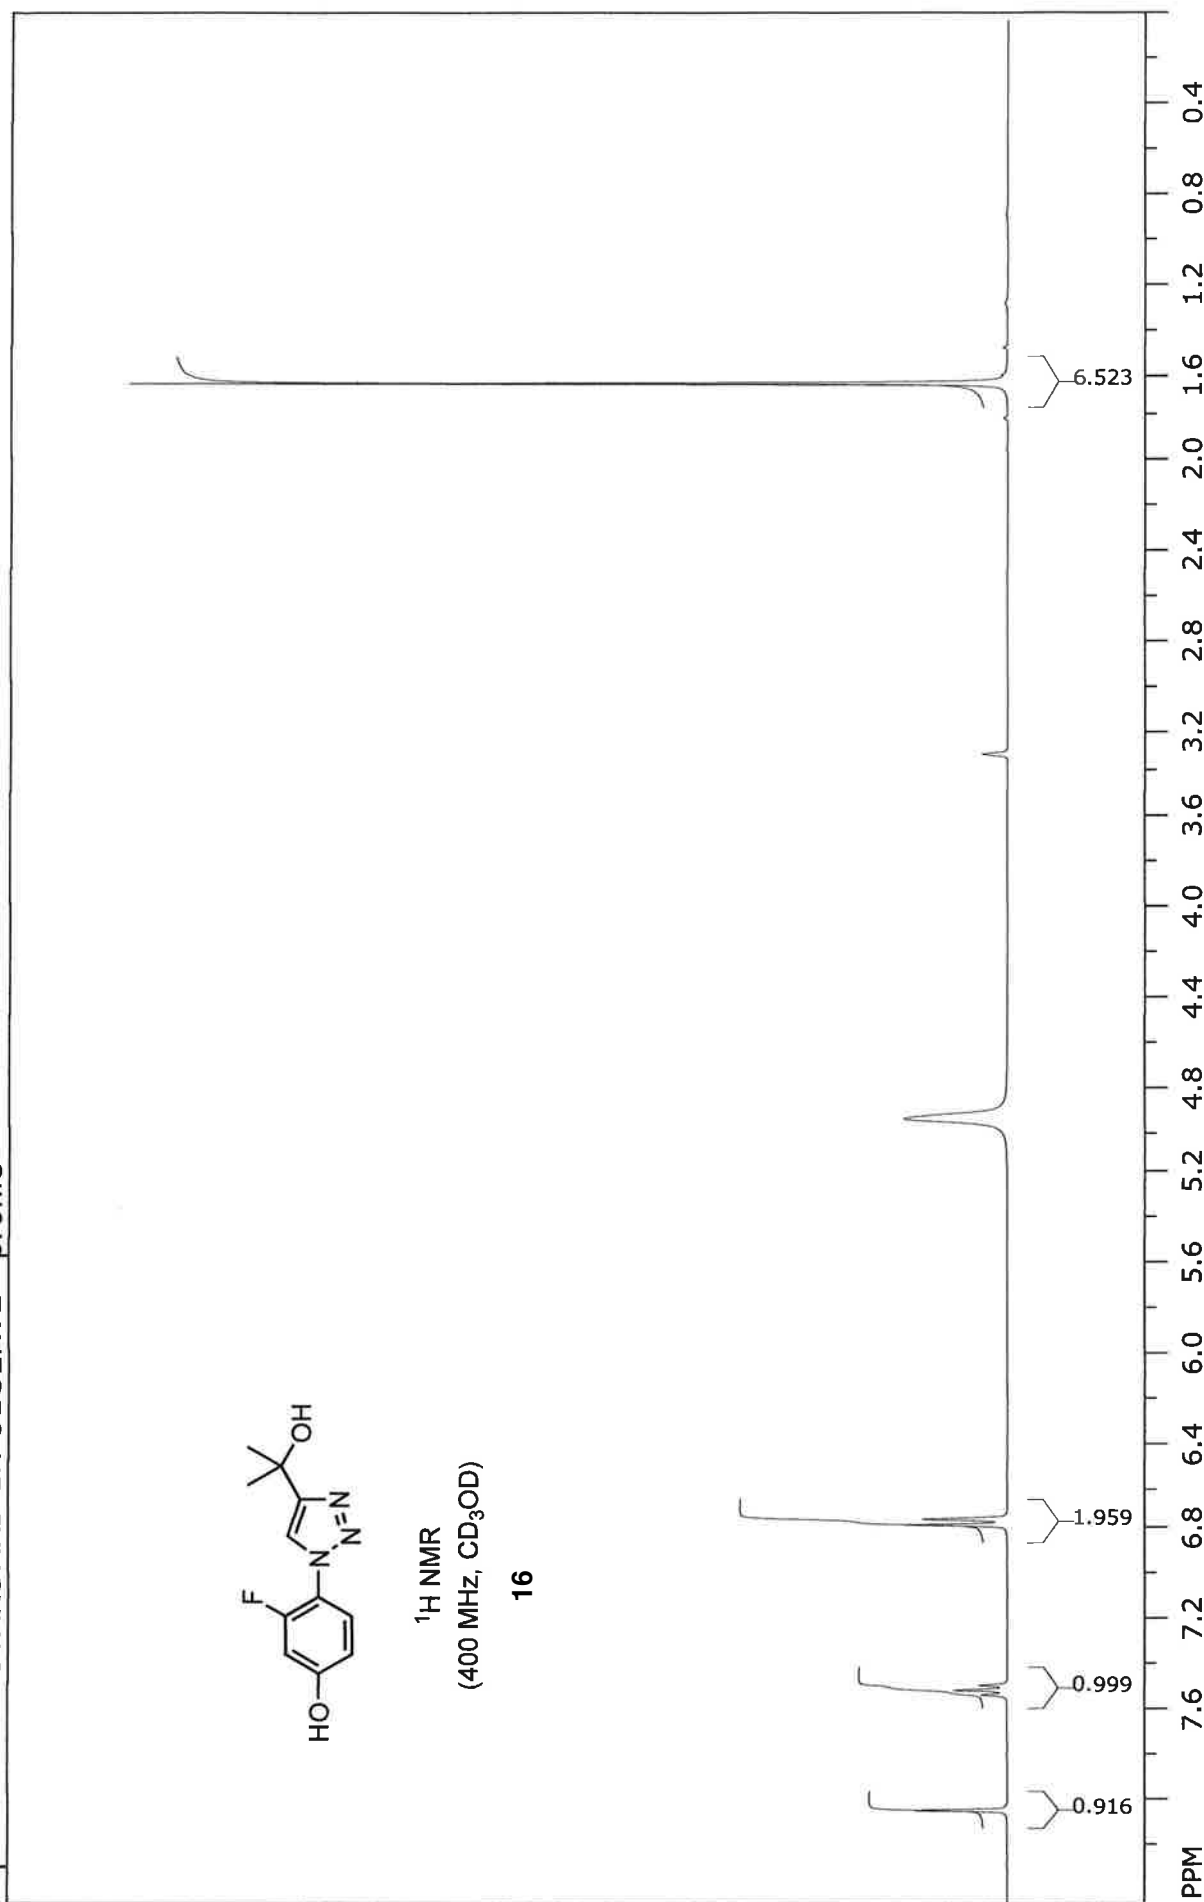

file: ...Triazole Compounds\GCC12-H.fid\fid block# 1 expt: "s2pul"  
transmitter freq.: 399.731815 MHz  
time domain size: 32768 points  
width: 6410.26 Hz = 16.0364 ppm = 0.195626 Hz/pt  
number of scans: 8

freq. of 0 ppm: 399.729414 MHz  
processed size: 32768 complex points  
LB: 0.610 GF: 0.0000  
Hz/cm: 135.897 ppm/cm: 0.33997

## SpinWorks 4: STANDARD 1H OBSERVE - profile

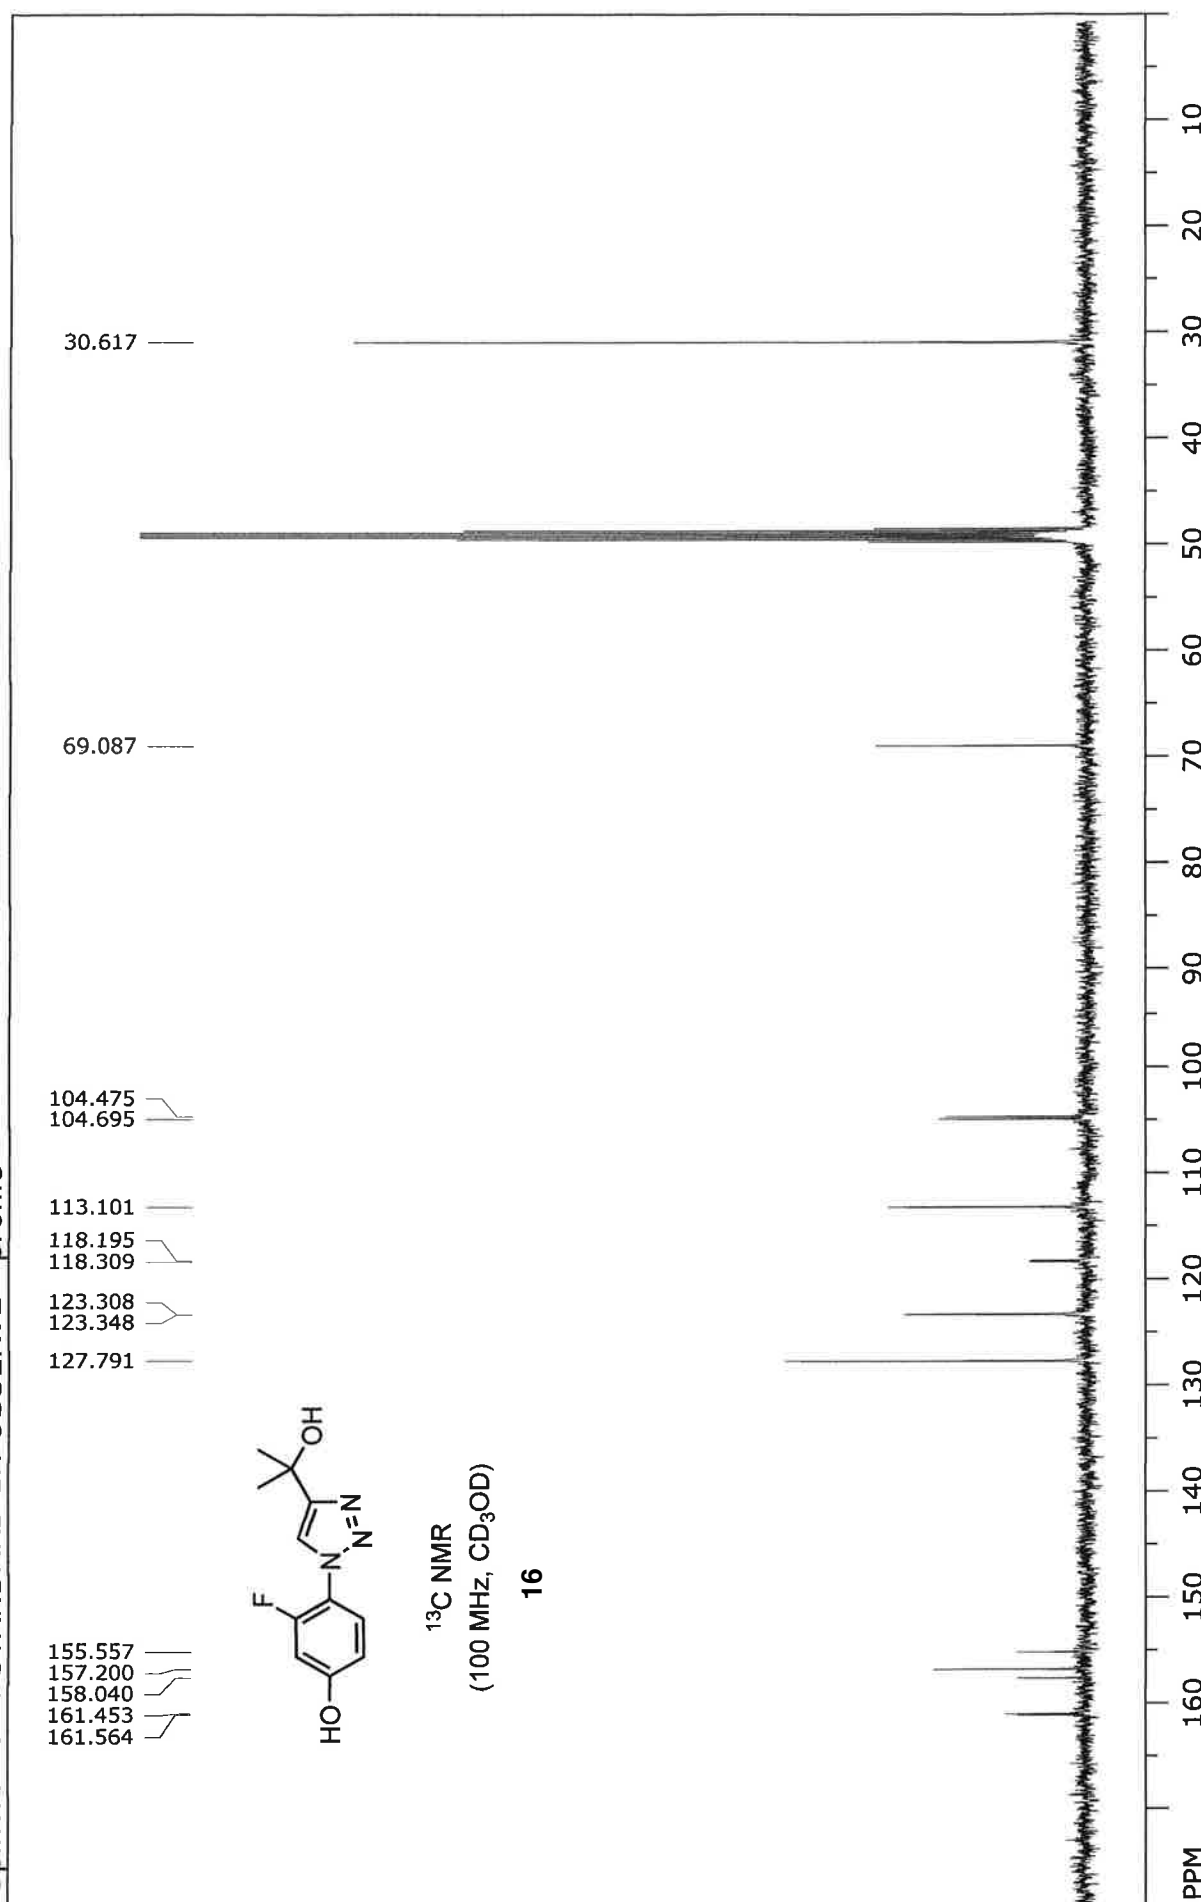

file: ...Triazole Compounds\GCC12-C.fid\fid block# 1 expt: "s2pul"

transmitter freq.: 100.523098 MHz

time domain size: 65536 points

width: 25000.00 Hz = 248.6991 ppm = 0.381470 Hz/pt

number of scans: 512

freq. of 0 ppm: 100.511900 MHz

processed size: 65536 complex points

LB: 2.000 GF: 0.0000

Hz/cm: 723.333 ppm/cm: 7.19569

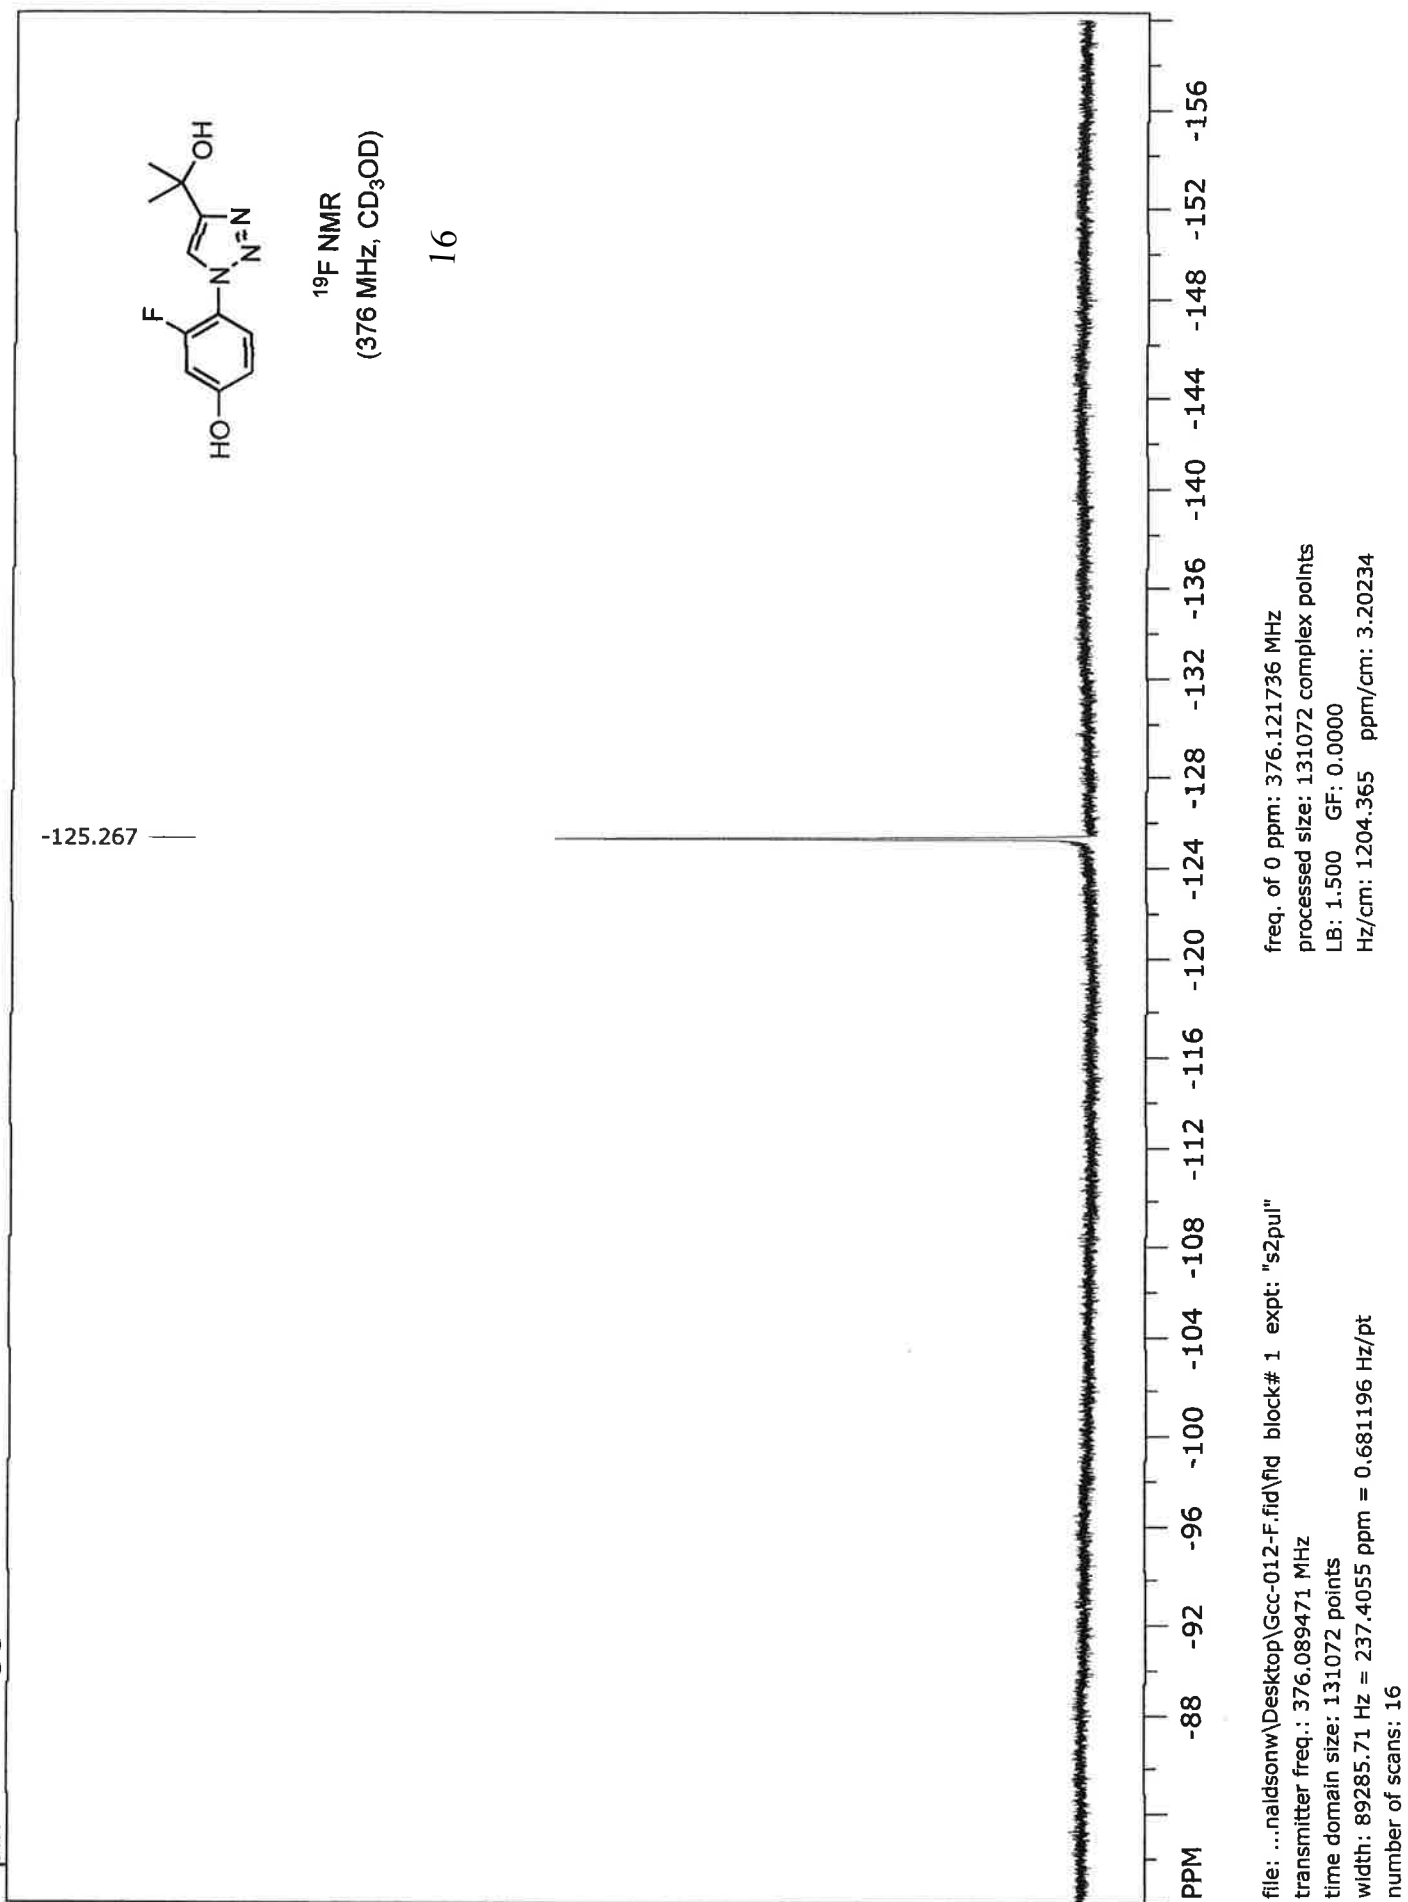



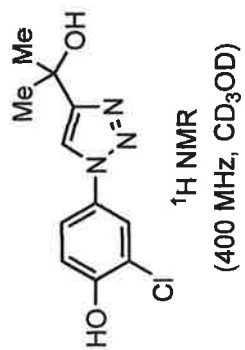

17

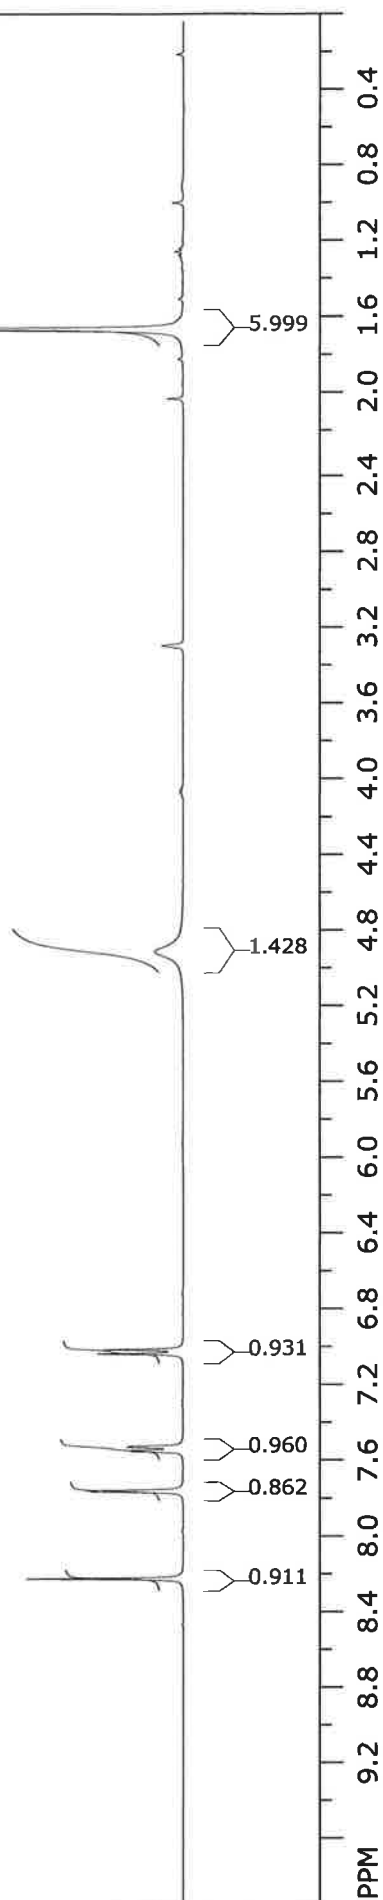

file: ...le Compounds\4\_16\_18\_GCC11.fid\fid block# 1 expt: "s2pul"  
transmitter freq.: 399.735724 MHz  
time domain size: 32768 points  
width: 6410.26 Hz = 16.0362 ppm = 0.195626 Hz/pt  
number of scans: 8  
freq. of 0 ppm: 399.733316 MHz  
processed size: 32768 complex points  
LB: 1.500 GF: 0.0000  
Hz/cm: 159.829 ppm/cm: 0.39984

## SpinWorks 4: 4\_16\_18\_GCC11CARBON

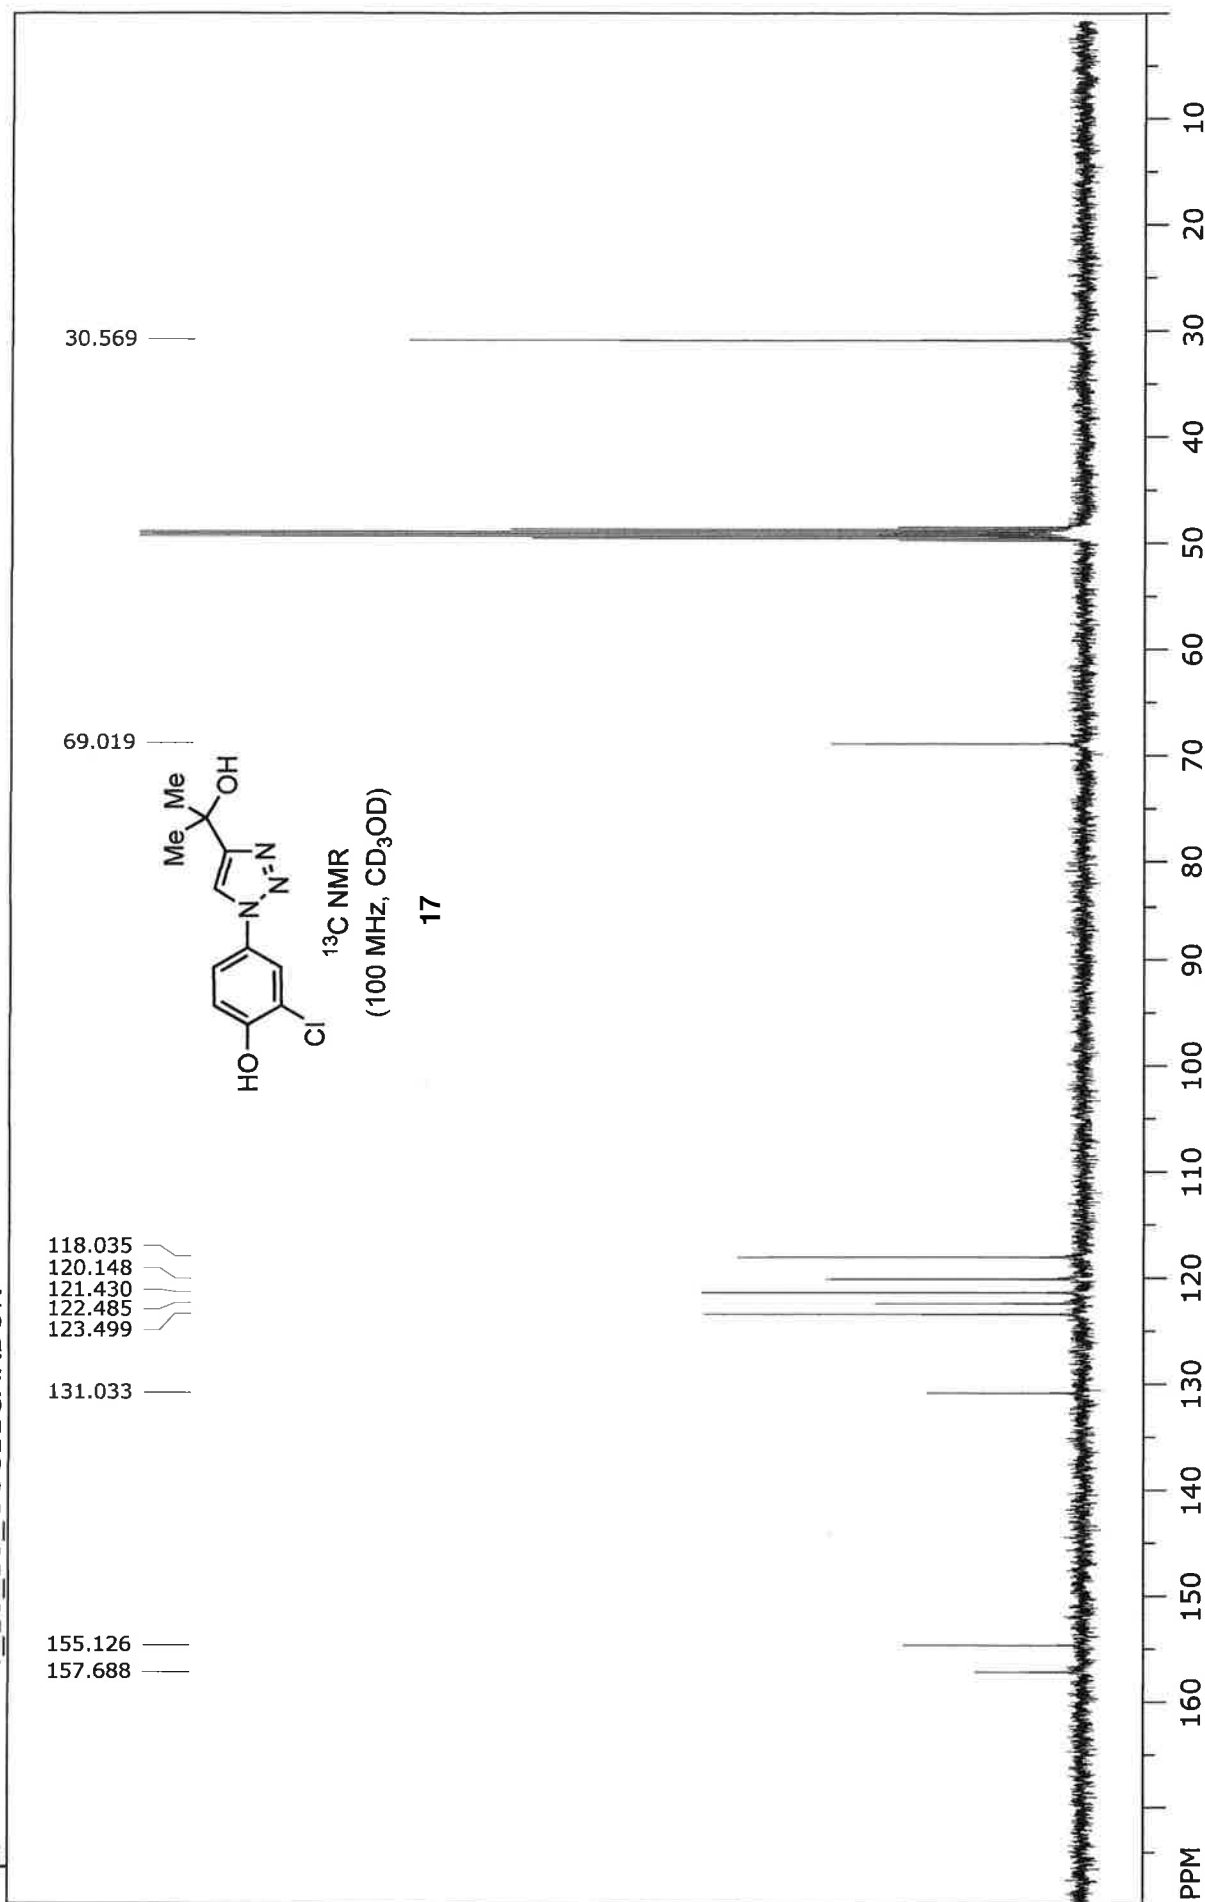

file: ...pounds\4\_16\_18\_GCC11CARBON.fid\fid block# 1 expt: "s2pul"  
 transmitter freq.: 100.524081 MHz  
 time domain size: 65536 points  
 width: 25000.00 Hz = 248.6966 ppm = 0.381470 Hz/pt  
 number of scans: 256

freq. of 0 ppm: 100.512883 MHz  
 processed size: 65536 complex points  
 LB: 1.500 GF: 0.0000  
 Hz/cm: 723.889 ppm/cm: 7.20115

# SpinWorks 4: STANDARD 1H OBSERVE

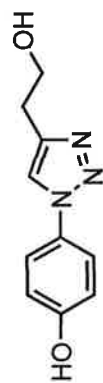

<sup>1</sup>H NMR  
(300 MHz, CD<sub>3</sub>OD)

18

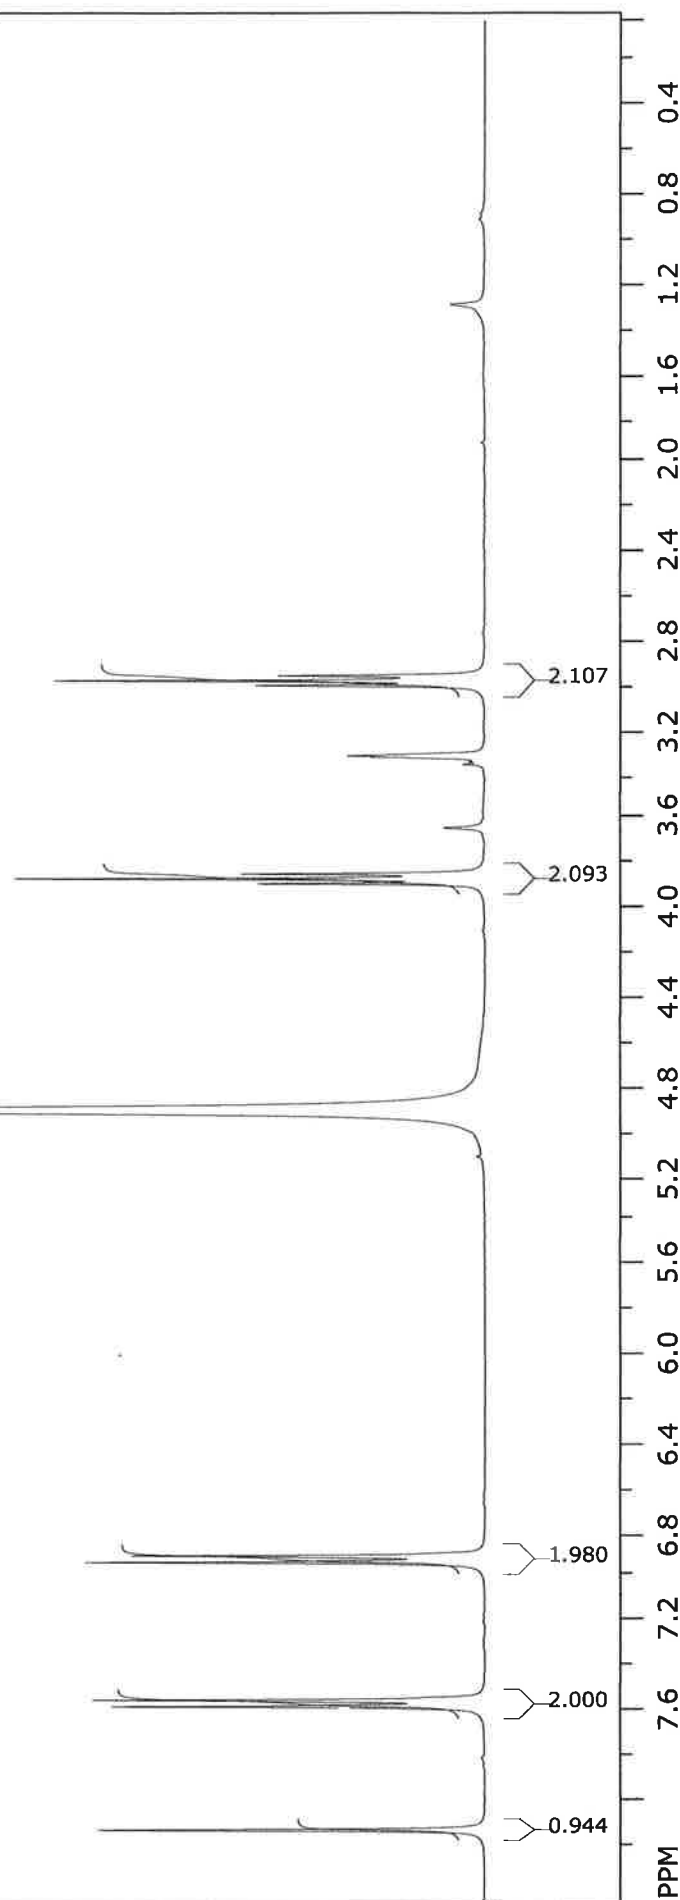

file: ...riazole Compounds\EAW152-H.fid\fid block# 1 expt: "s2pul"  
transmitter freq.: 300.134191 MHz  
time domain size: 19192 points  
width: 4803.07 Hz = 16.0031 ppm = 0.250264 Hz/pt  
number of scans: 8

## SpinWorks 4: 13C OBSERVE

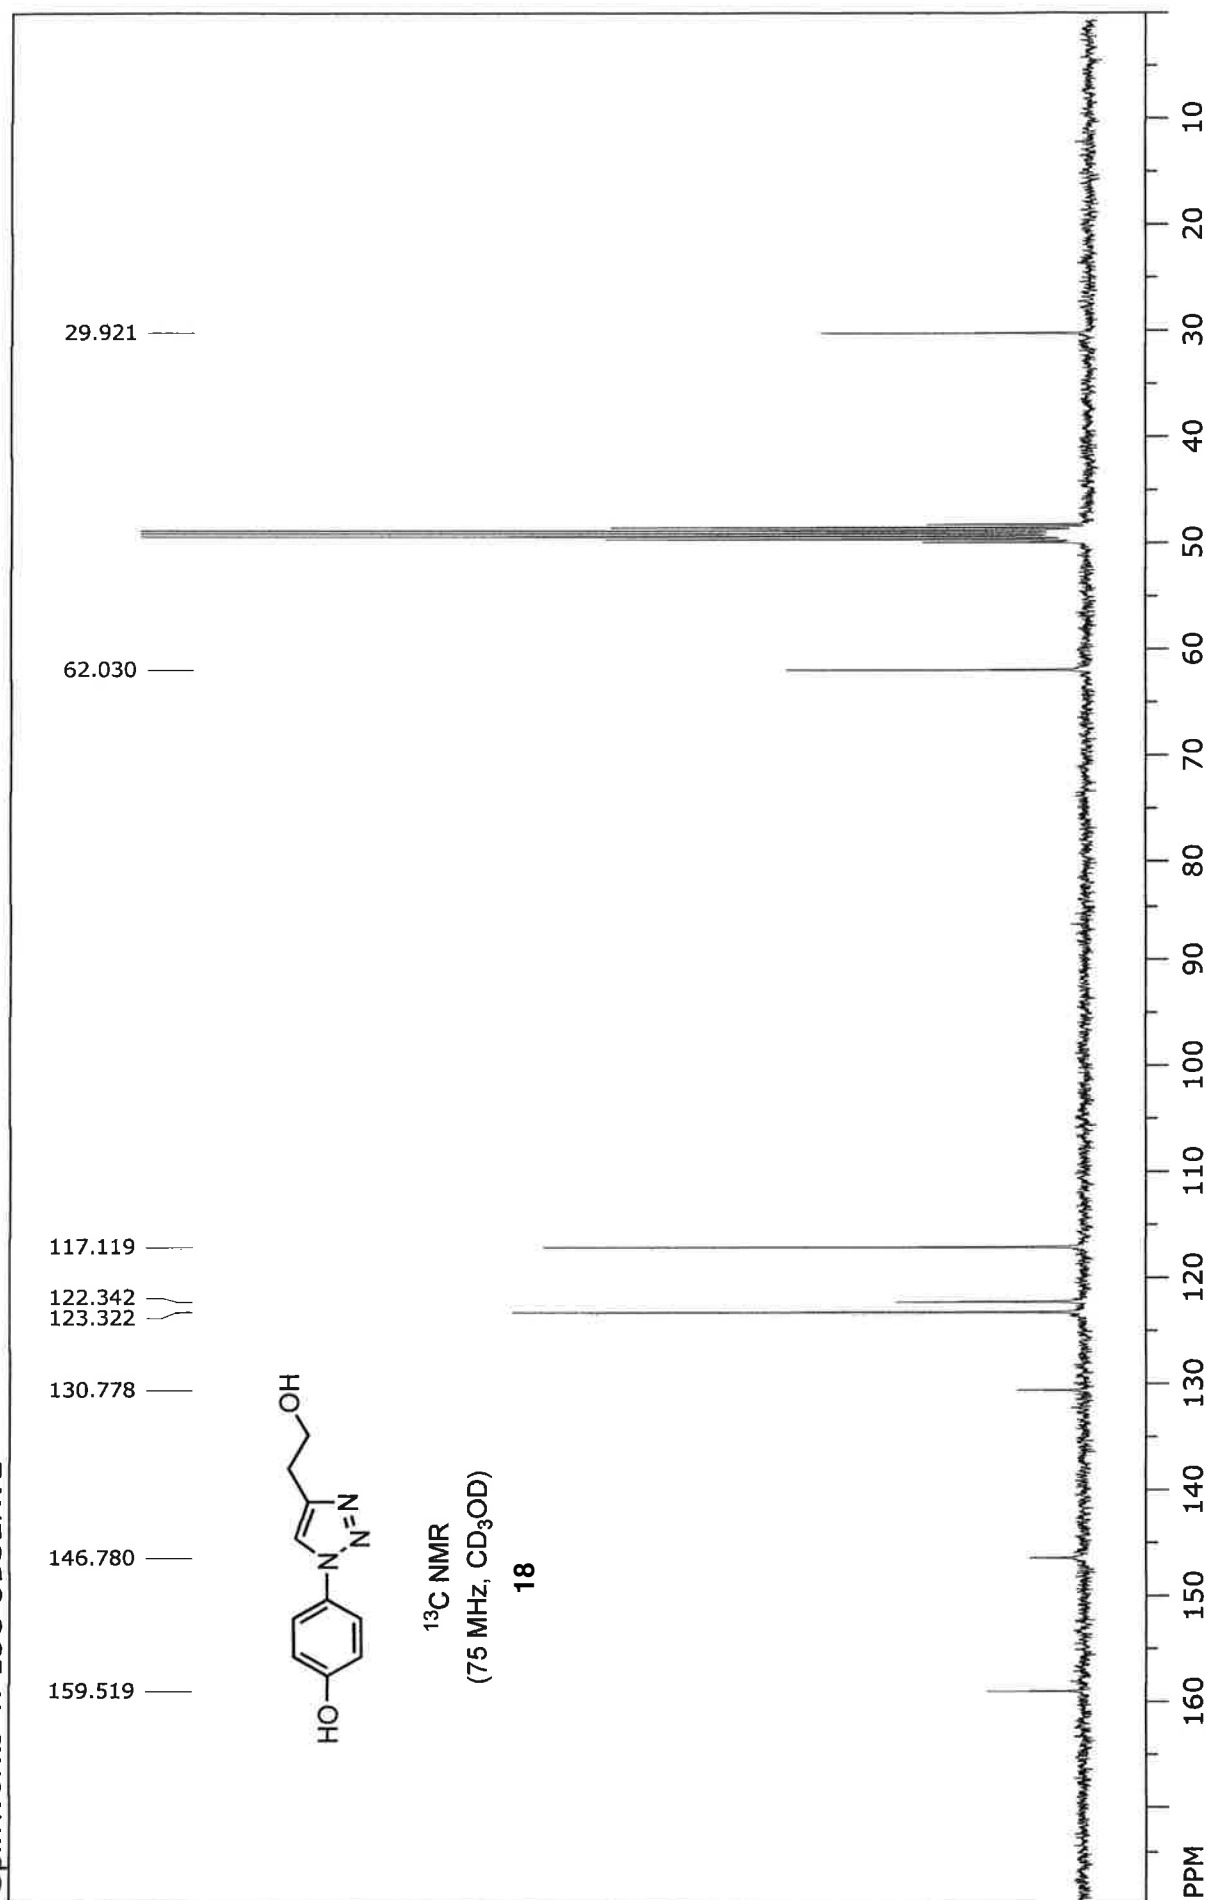

file: ...riazole Compounds\EAW152-C.fid\fid block# 1 expt: "s2pul"

transmitter freq.: 75.476633 MHz

time domain size: 68492 points

width: 18867.92 Hz = 249.9837 ppm = 0.275476 Hz/pt

number of scans: 1024

freq. of 0 ppm: 75.468242 MHz

processed size: 131072 complex points

LB: 2.000 GF: 0.0000

Hz/cm: 543.396 ppm/cm: 7.19953

# SpinWorks 4: STANDARD 1H OBSERVE

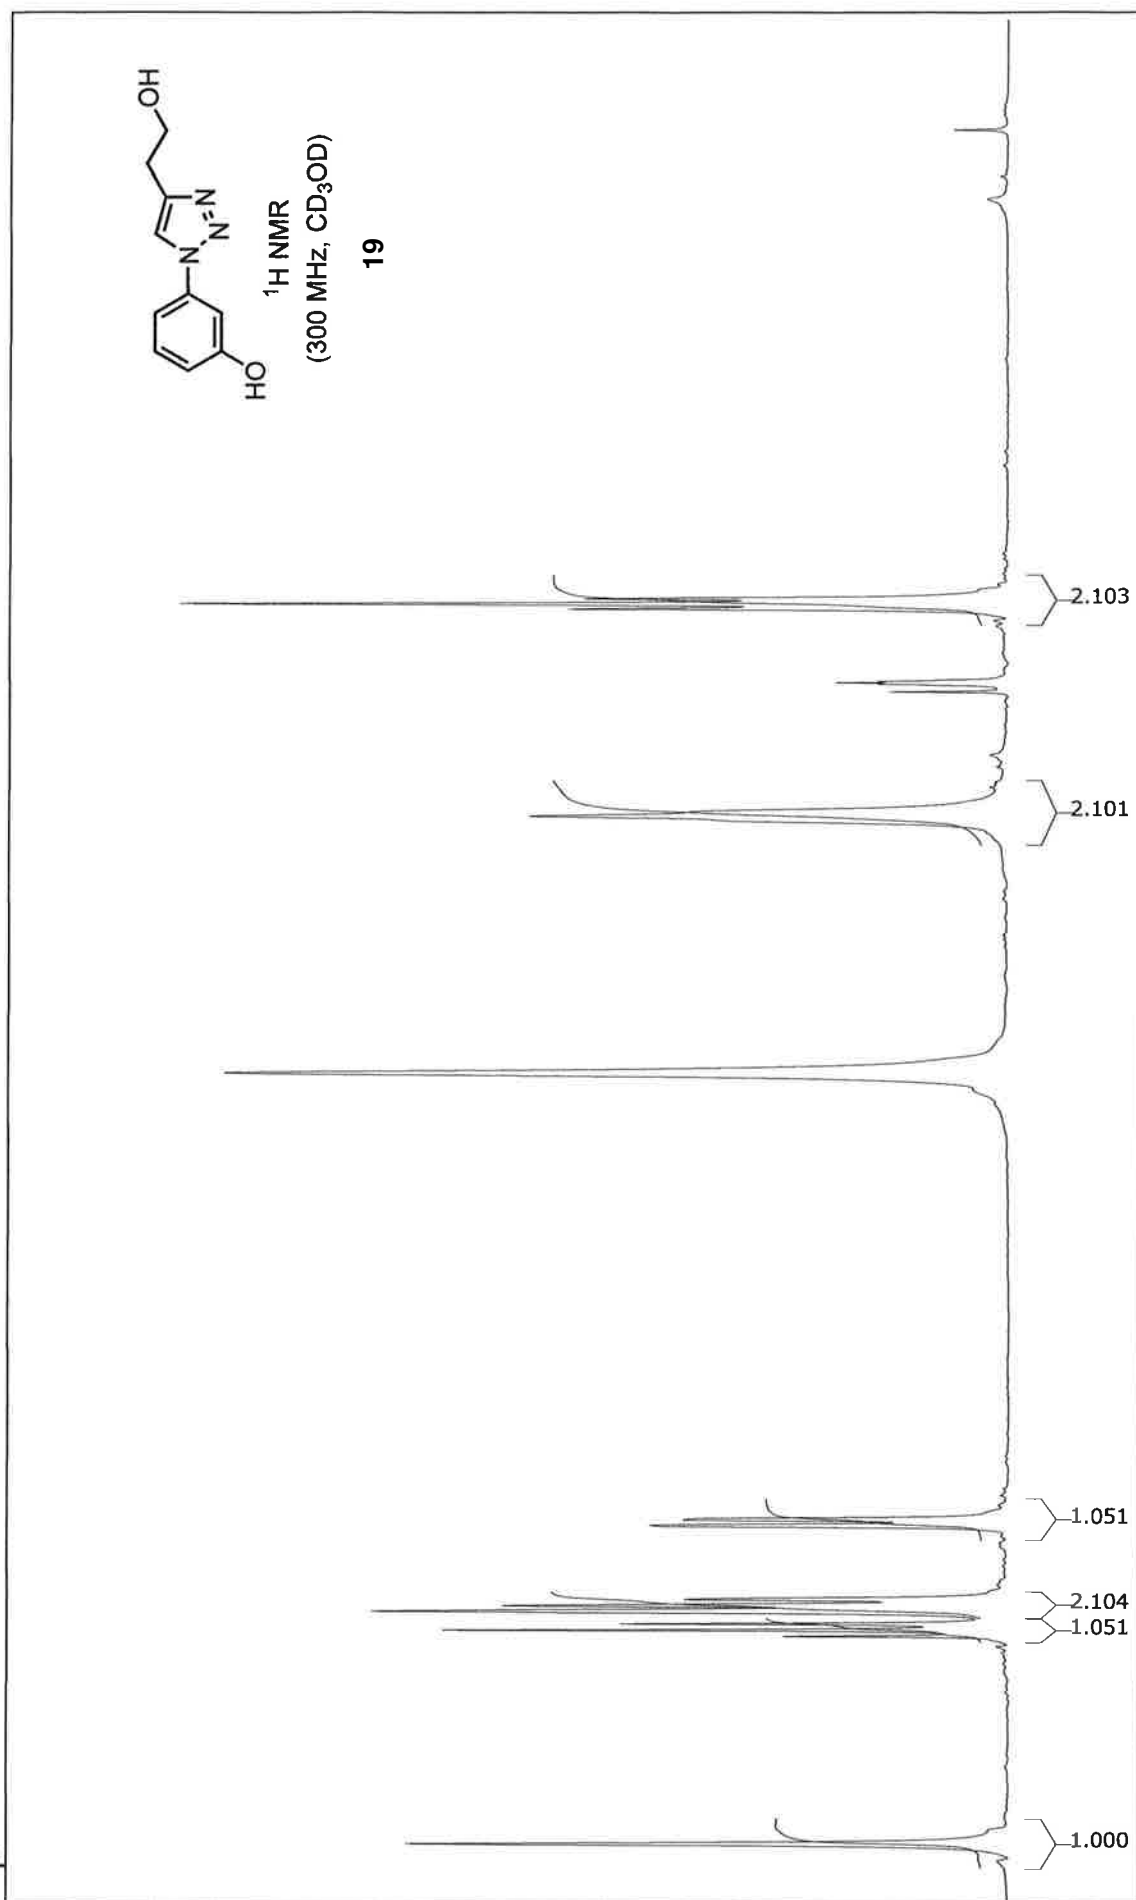

file: ... Compounds\12\_10\_17\_REDCAP.fid\fid block# 1 expt: "s2pul"

transmitter freq.: 300.134191 MHz

time domain size: 19192 points

width: 4803.07 Hz = 16.0031 ppm = 0.250264 Hz/pt

number of scans: 8

freq. of 0 ppm: 300.132385 MHz  
 processed size: 32768 complex points  
 LB: 0.500 GF: 0.0000  
 Hz/cm: 96.061 ppm/cm: 0.32006

## SpinWorks 4: 13C OBSERVE

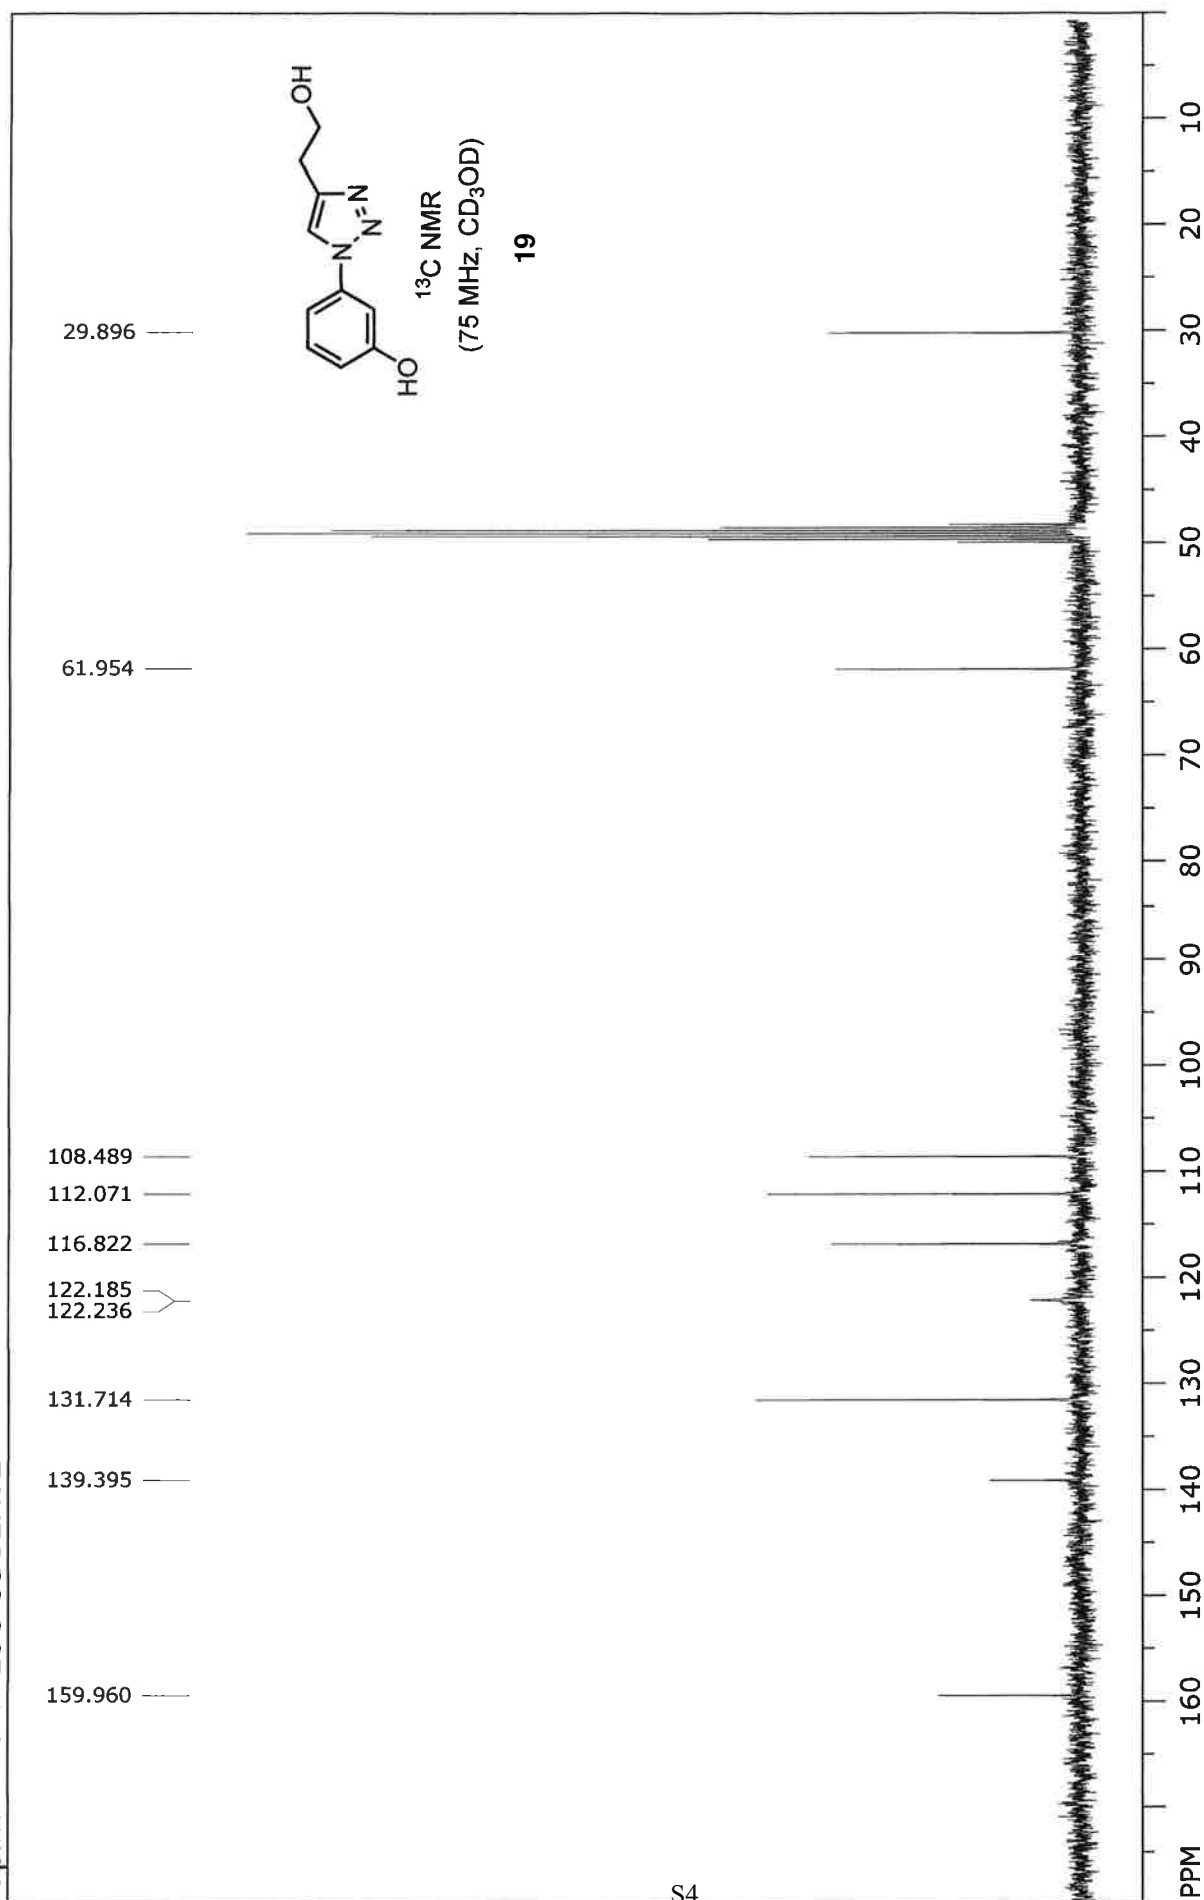

file: ...unds\12\_10\_17\_REDAPCARBON.fid\fid block# 1 expt: "s2pul"

transmitter freq.: 75.476633 MHz

time domain size: 68492 points

width: 18867.92 Hz = 249.9837 ppm = 0.275476 Hz/pt

number of scans: 64

freq. of 0 ppm: 75.468243 MHz

processed size: 131072 complex points

LB: 1.500 GF: 0.0000

Hz/cm: 543.396 ppm/cm: 7.19953

# SpinWorks 4: STANDARD 1H OBSERVE

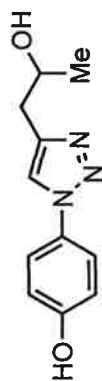

<sup>1</sup>H NMR  
(300 MHz, CD<sub>3</sub>OD)

20

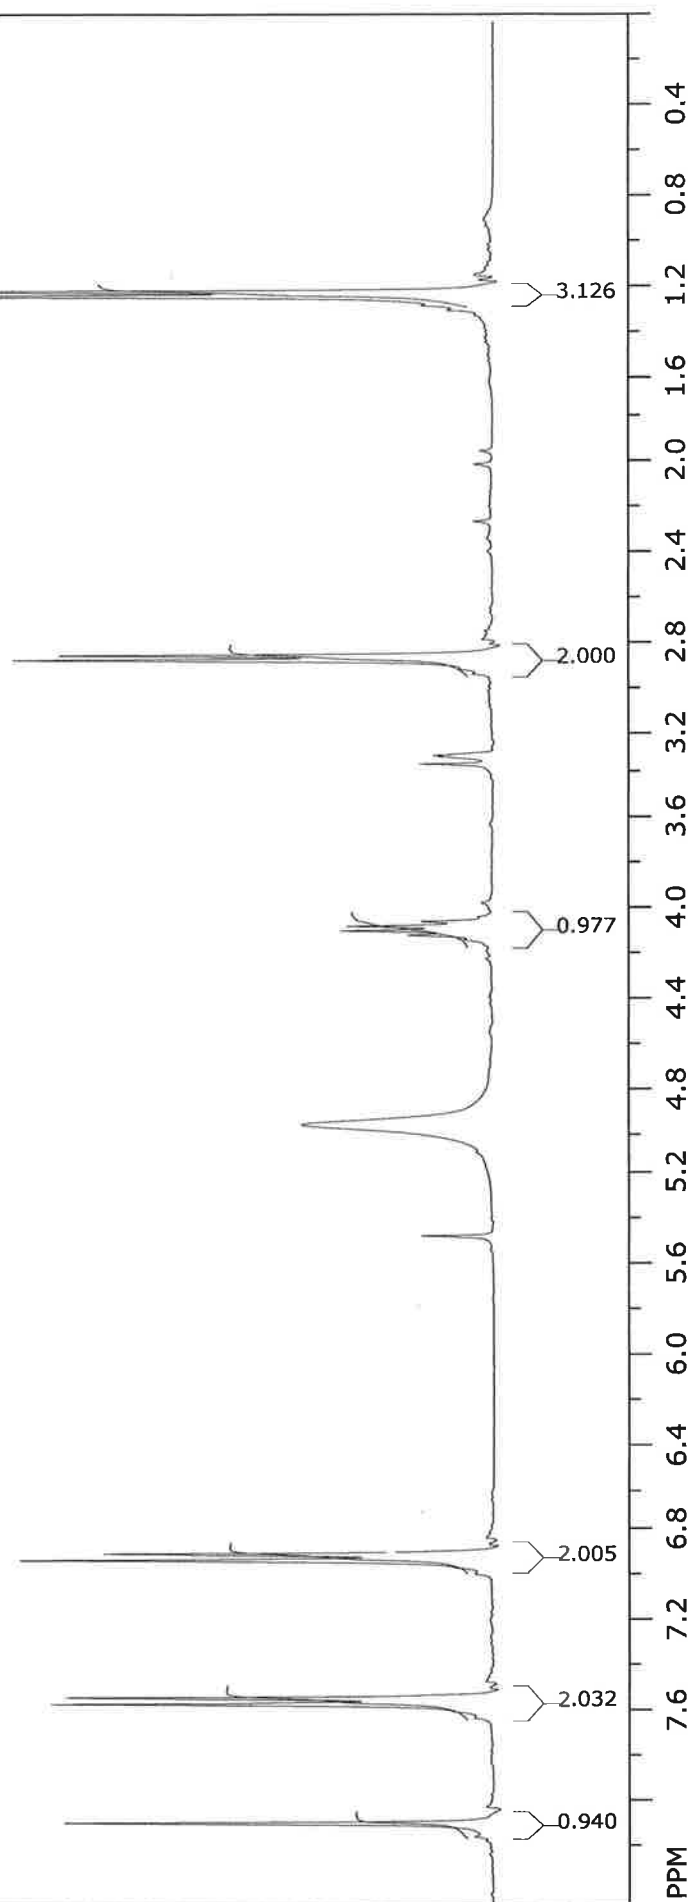

file: ...\_azidophenol\_4\_propyn\_2\_ol.fid\fid block# 1 expt: "s2pul"

transmitter freq.: 300.134191 MHz

time domain size: 19192 points

width: 4803.07 Hz = 16.0031 ppm = 0.250264 Hz/pt

number of scans: 8

freq. of 0 ppm: 300.132382 MHz  
processed size: 32768 complex points  
LB: 0.500 GF: 0.0000  
Hz/cm: 102.039 ppm/cm: 0.33998

## SpinWorks 4: 13C OBSERVE

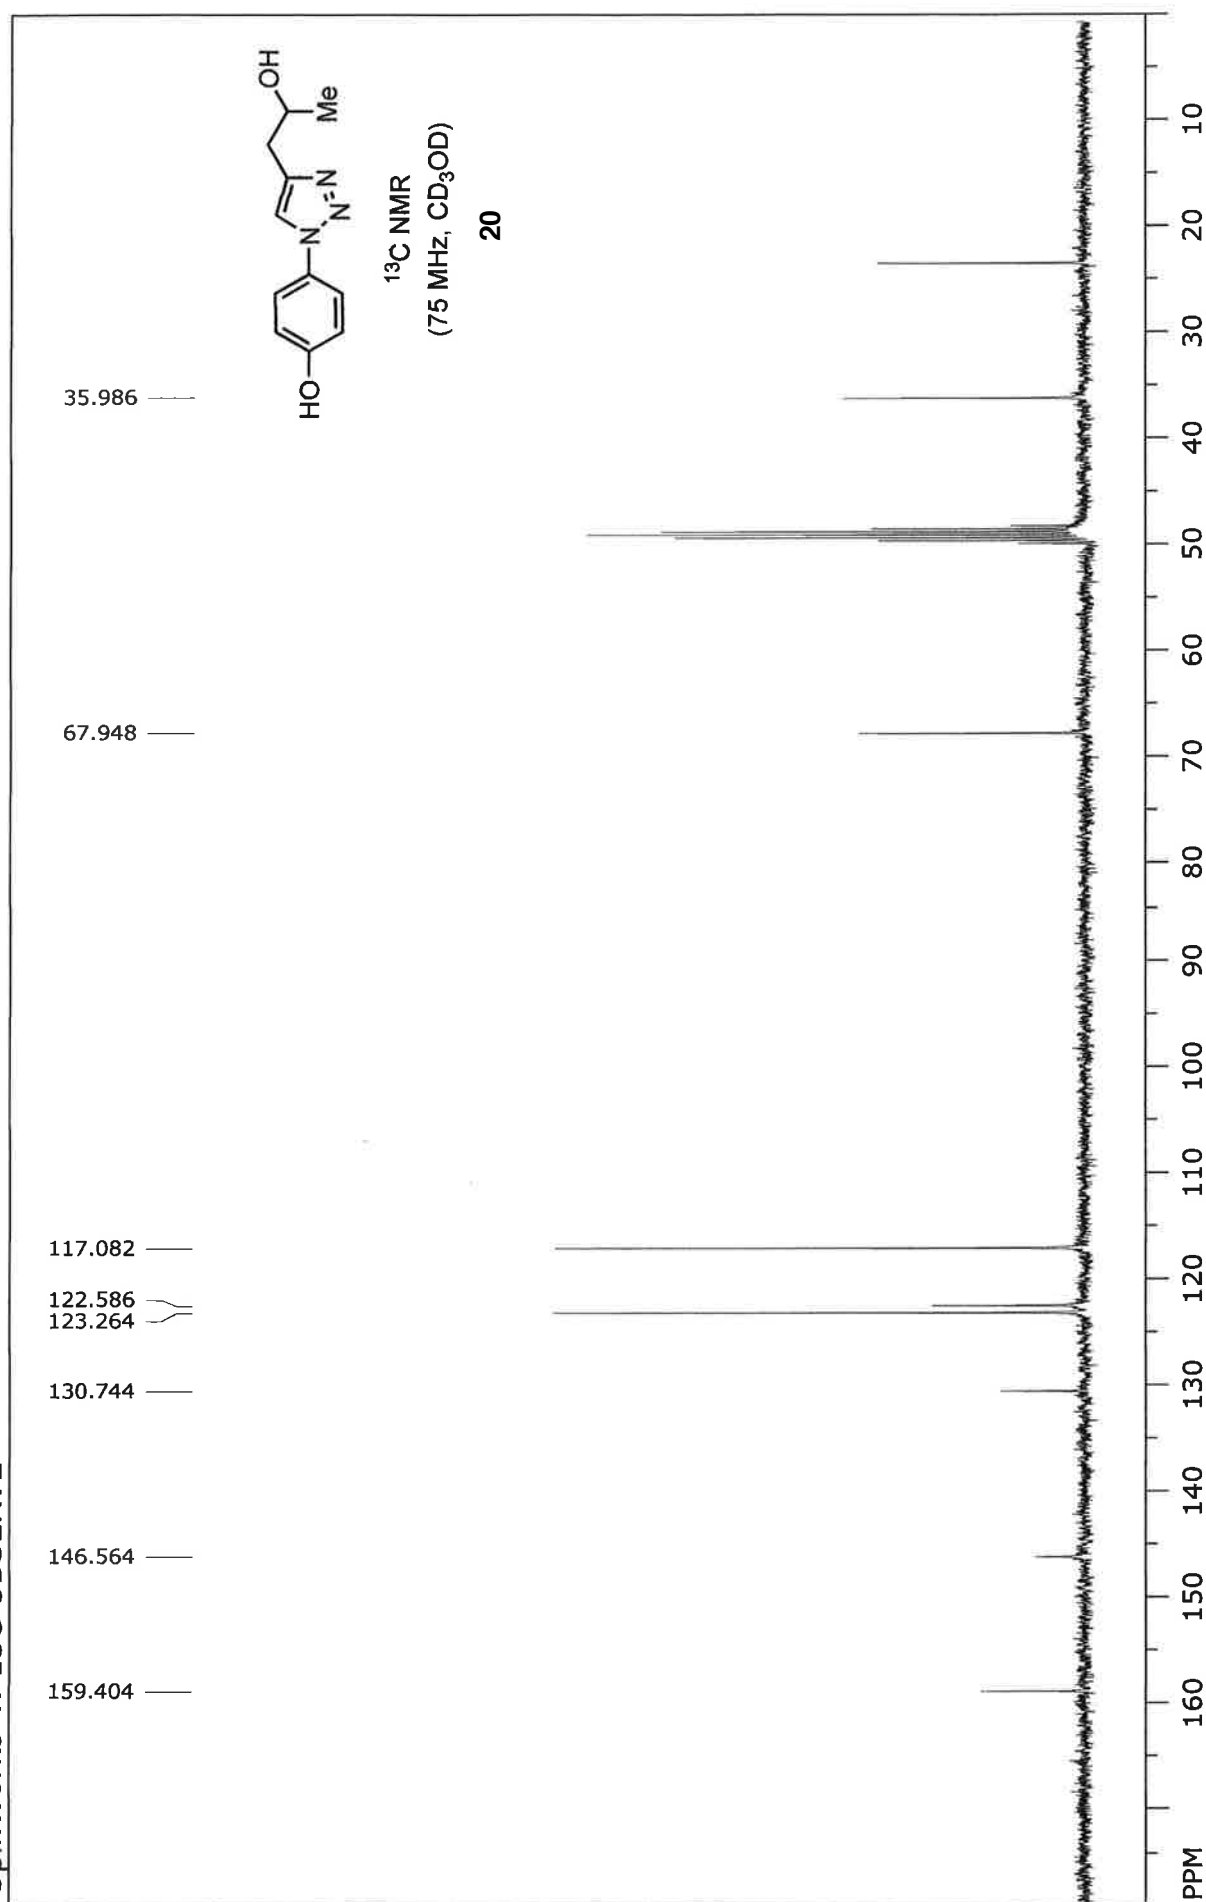

file: ...phenol\_4\_propyn\_2\_olCARBON.fid\fid block# 1 expt: "s2pul"  
 transmitter freq.: 75.476633 MHz  
 time domain size: 68492 points  
 width: 18867.92 Hz = 249.9837 ppm = 0.275476 Hz/pt  
 number of scans: 64

freq. of 0 ppm: 75.468243 MHz  
 processed size: 131072 complex points  
 LB: 1.500 GF: 0.0000  
 Hz/cm: 543.396 ppm/cm: 7.19953



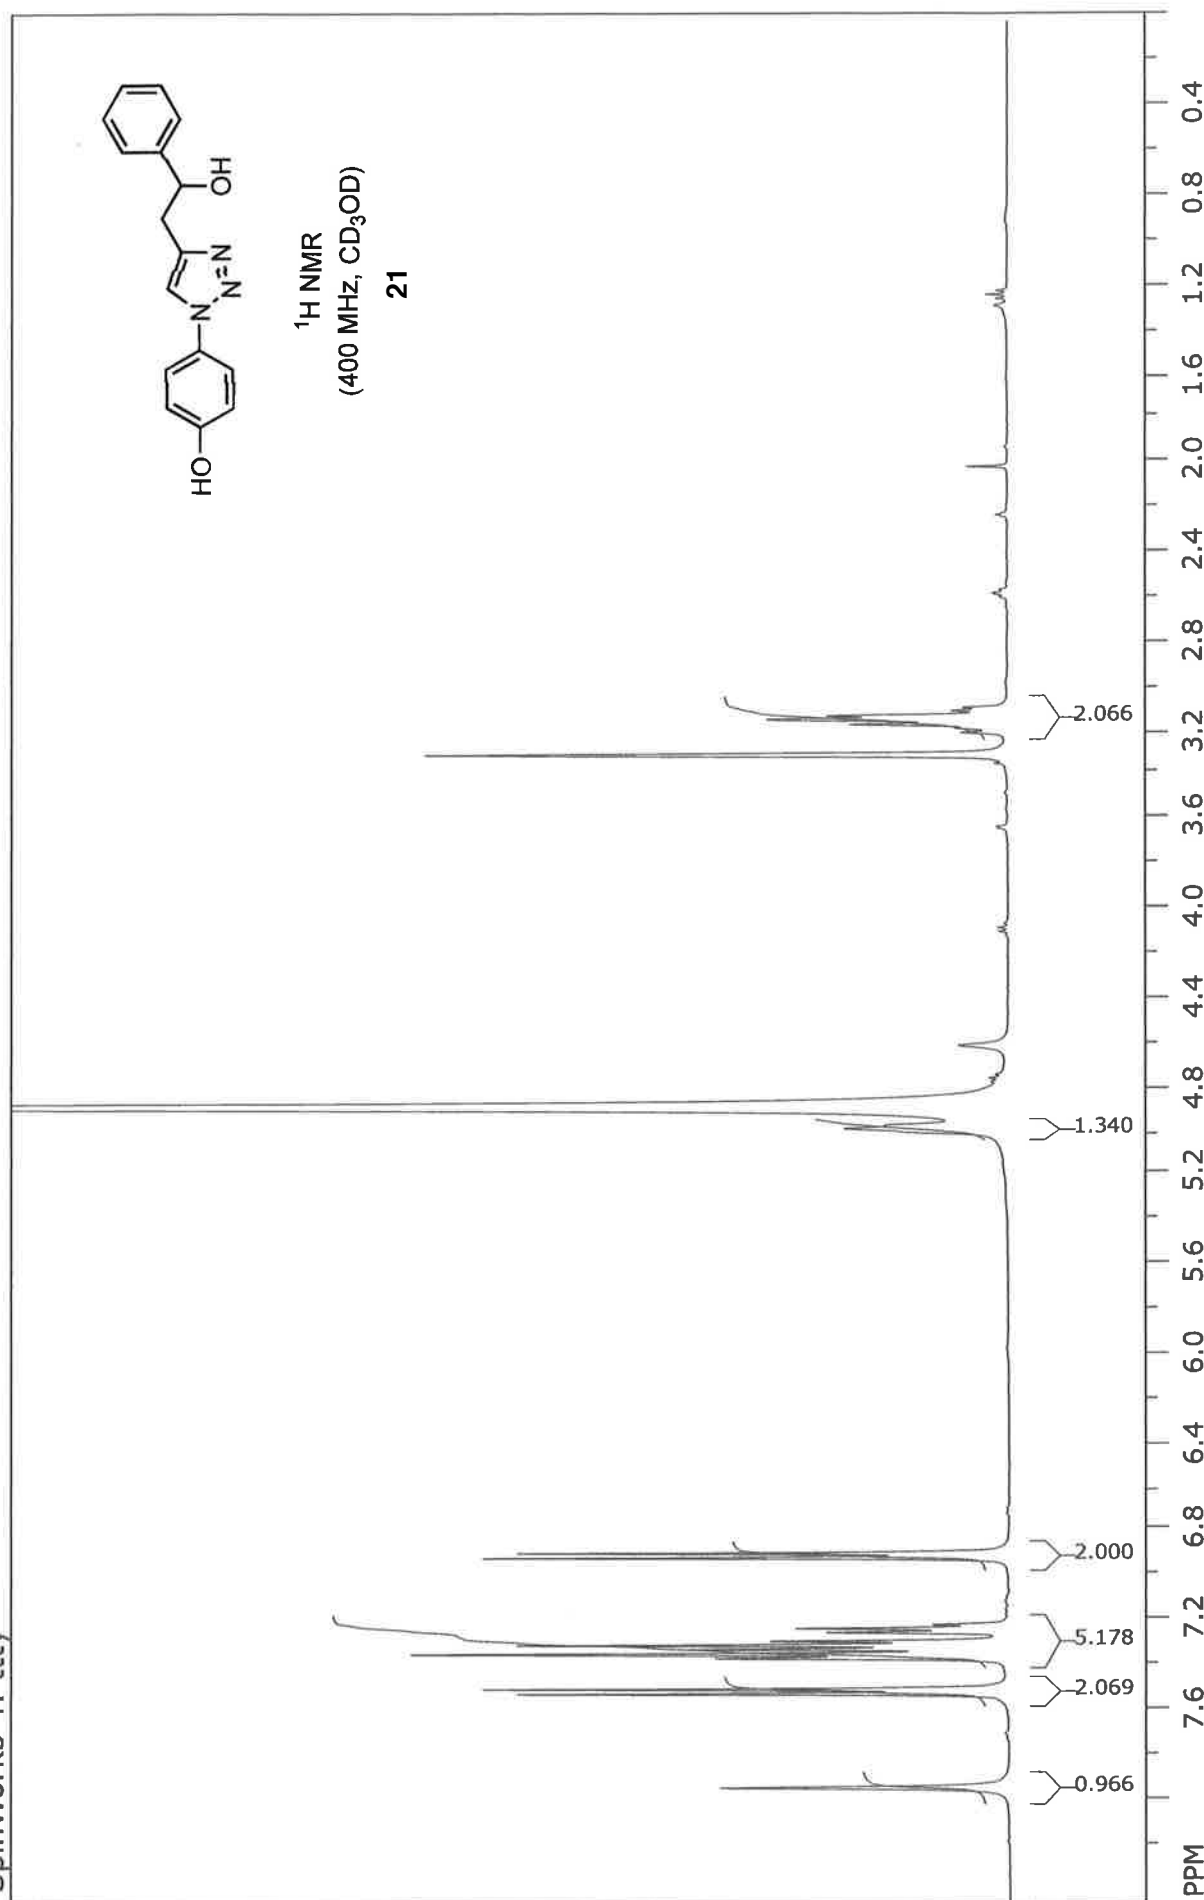

file: ...sonw\Desktop\WD358f1proton.fid\fid block# 1 expt: "s2pul"

transmitter freq.: 399.731816 MHz

time domain size: 32768 points

width: 6410.26 Hz = 16.0364 ppm = 0.195626 Hz/pt

number of scans: 8

freq. of 0 ppm: 399.729415 MHz

processed size: 32768 complex points

LB: 0.610 GF: 0.0000

Hz/cm: 135.897 ppm/cm: 0.33997

SpinWorks 4: tttty

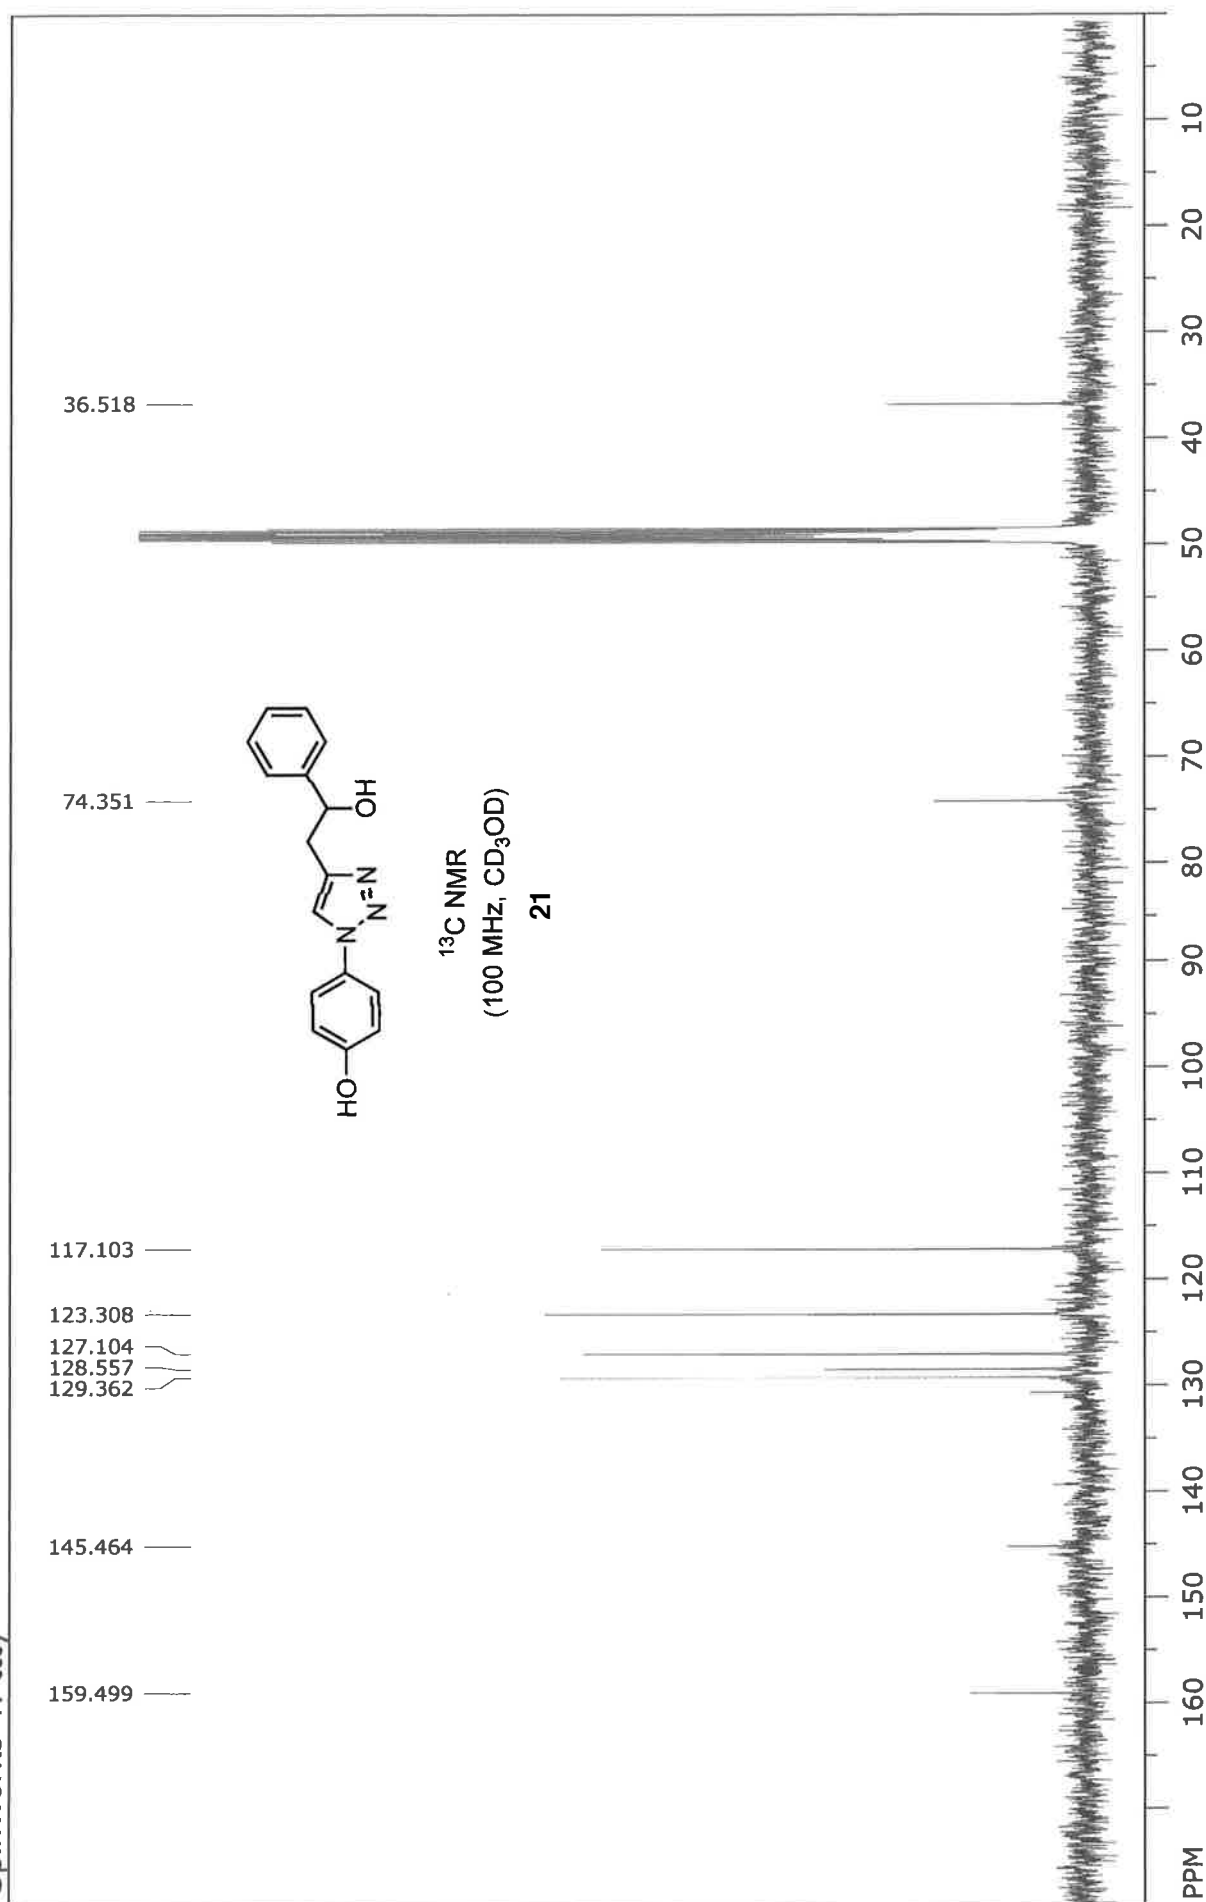

file: ...sonw\Desktop\WD358f1carbon.fid\fid block# 1 expt: "s2pul"

transmitter freq.: 100.523098 MHz

time domain size: 65536 points

width: 25000.00 Hz = 248.6991 ppm = 0.381470 Hz/pt

number of scans: 1024

freq. of 0 ppm: 100.511897 MHz

processed size: 65536 complex points

LB: 2.500 GF: 0.0000

Hz/cm: 723.333 ppm/cm: 7.19569
